# THE AMERICAN JOURNAL OF PSYCHIATRY

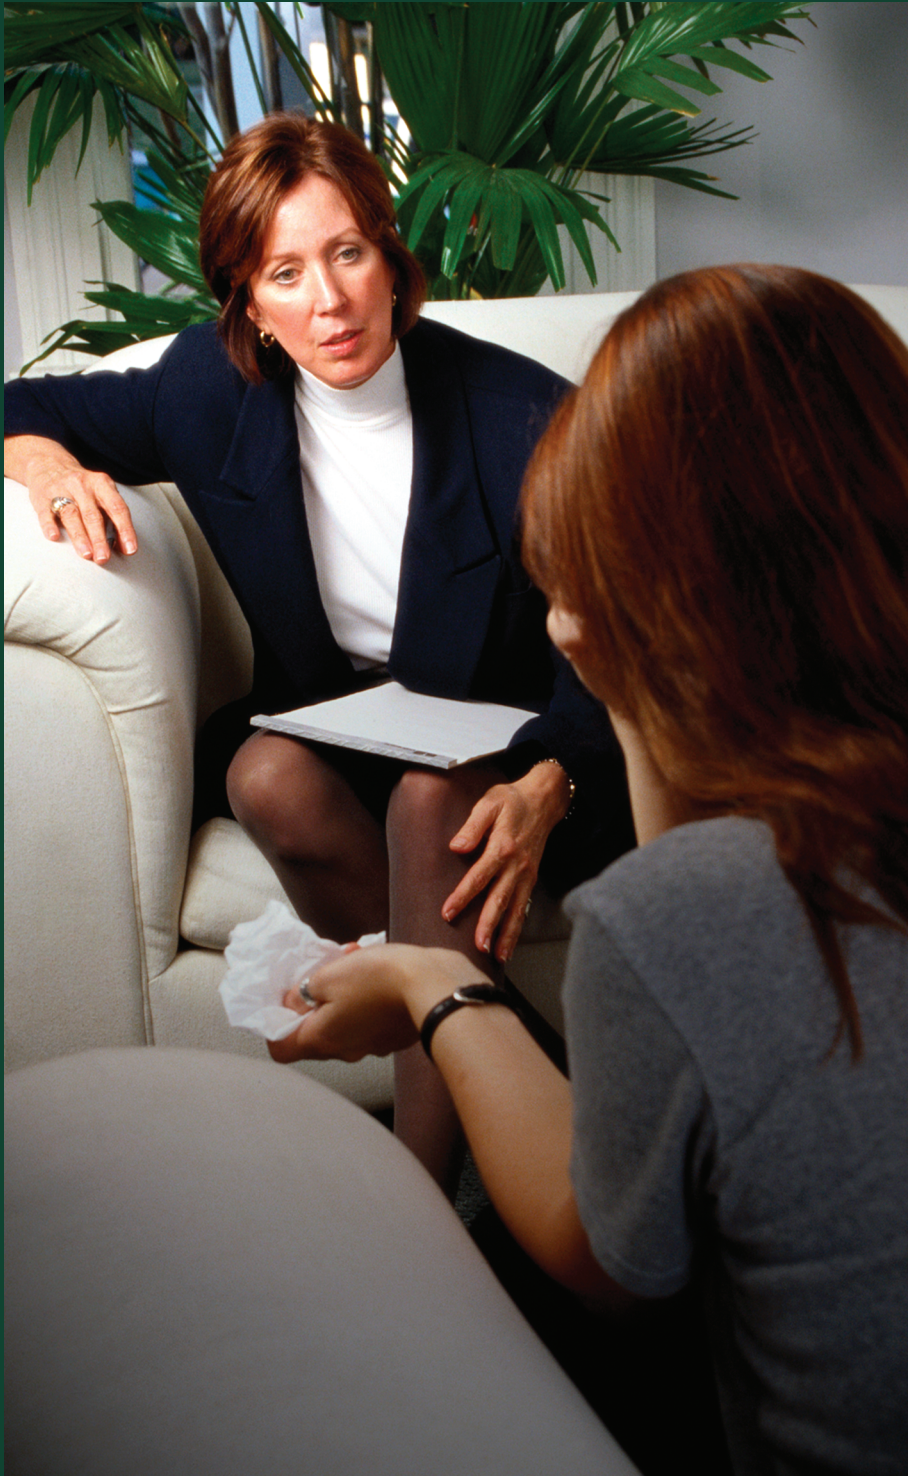

**Cognitive Therapy Versus Medication  
in Augmentation and Switch Strategies  
as Second-Step Treatments:  
A STAR\*D Report**

Michael E. Thase et al. 739

**Acceptability of Second-Step  
Treatments to Depressed Outpatients:  
A STAR\*D Report**

Stephen R. Wisniewski et al. 753

**Randomized Trial of Weekly,  
Twice-Monthly, and Monthly  
Interpersonal Psychotherapy as  
Maintenance Treatment for Women  
With Recurrent Depression**

Ellen Frank et al. 761

**Medication Access and Continuity:  
The Experiences of Dual-Eligible  
Psychiatric Patients During the First  
4 Months of the Medicare Prescription  
Drug Benefit**

Joyce C. West et al. 789

**Continuing Medical Education** 840

**May 2007**

**Volume 164 • Number 5**

---

Official Journal of the  
AMERICAN PSYCHIATRIC ASSOCIATION

---

[ajp.psychiatryonline.org](http://ajp.psychiatryonline.org)
