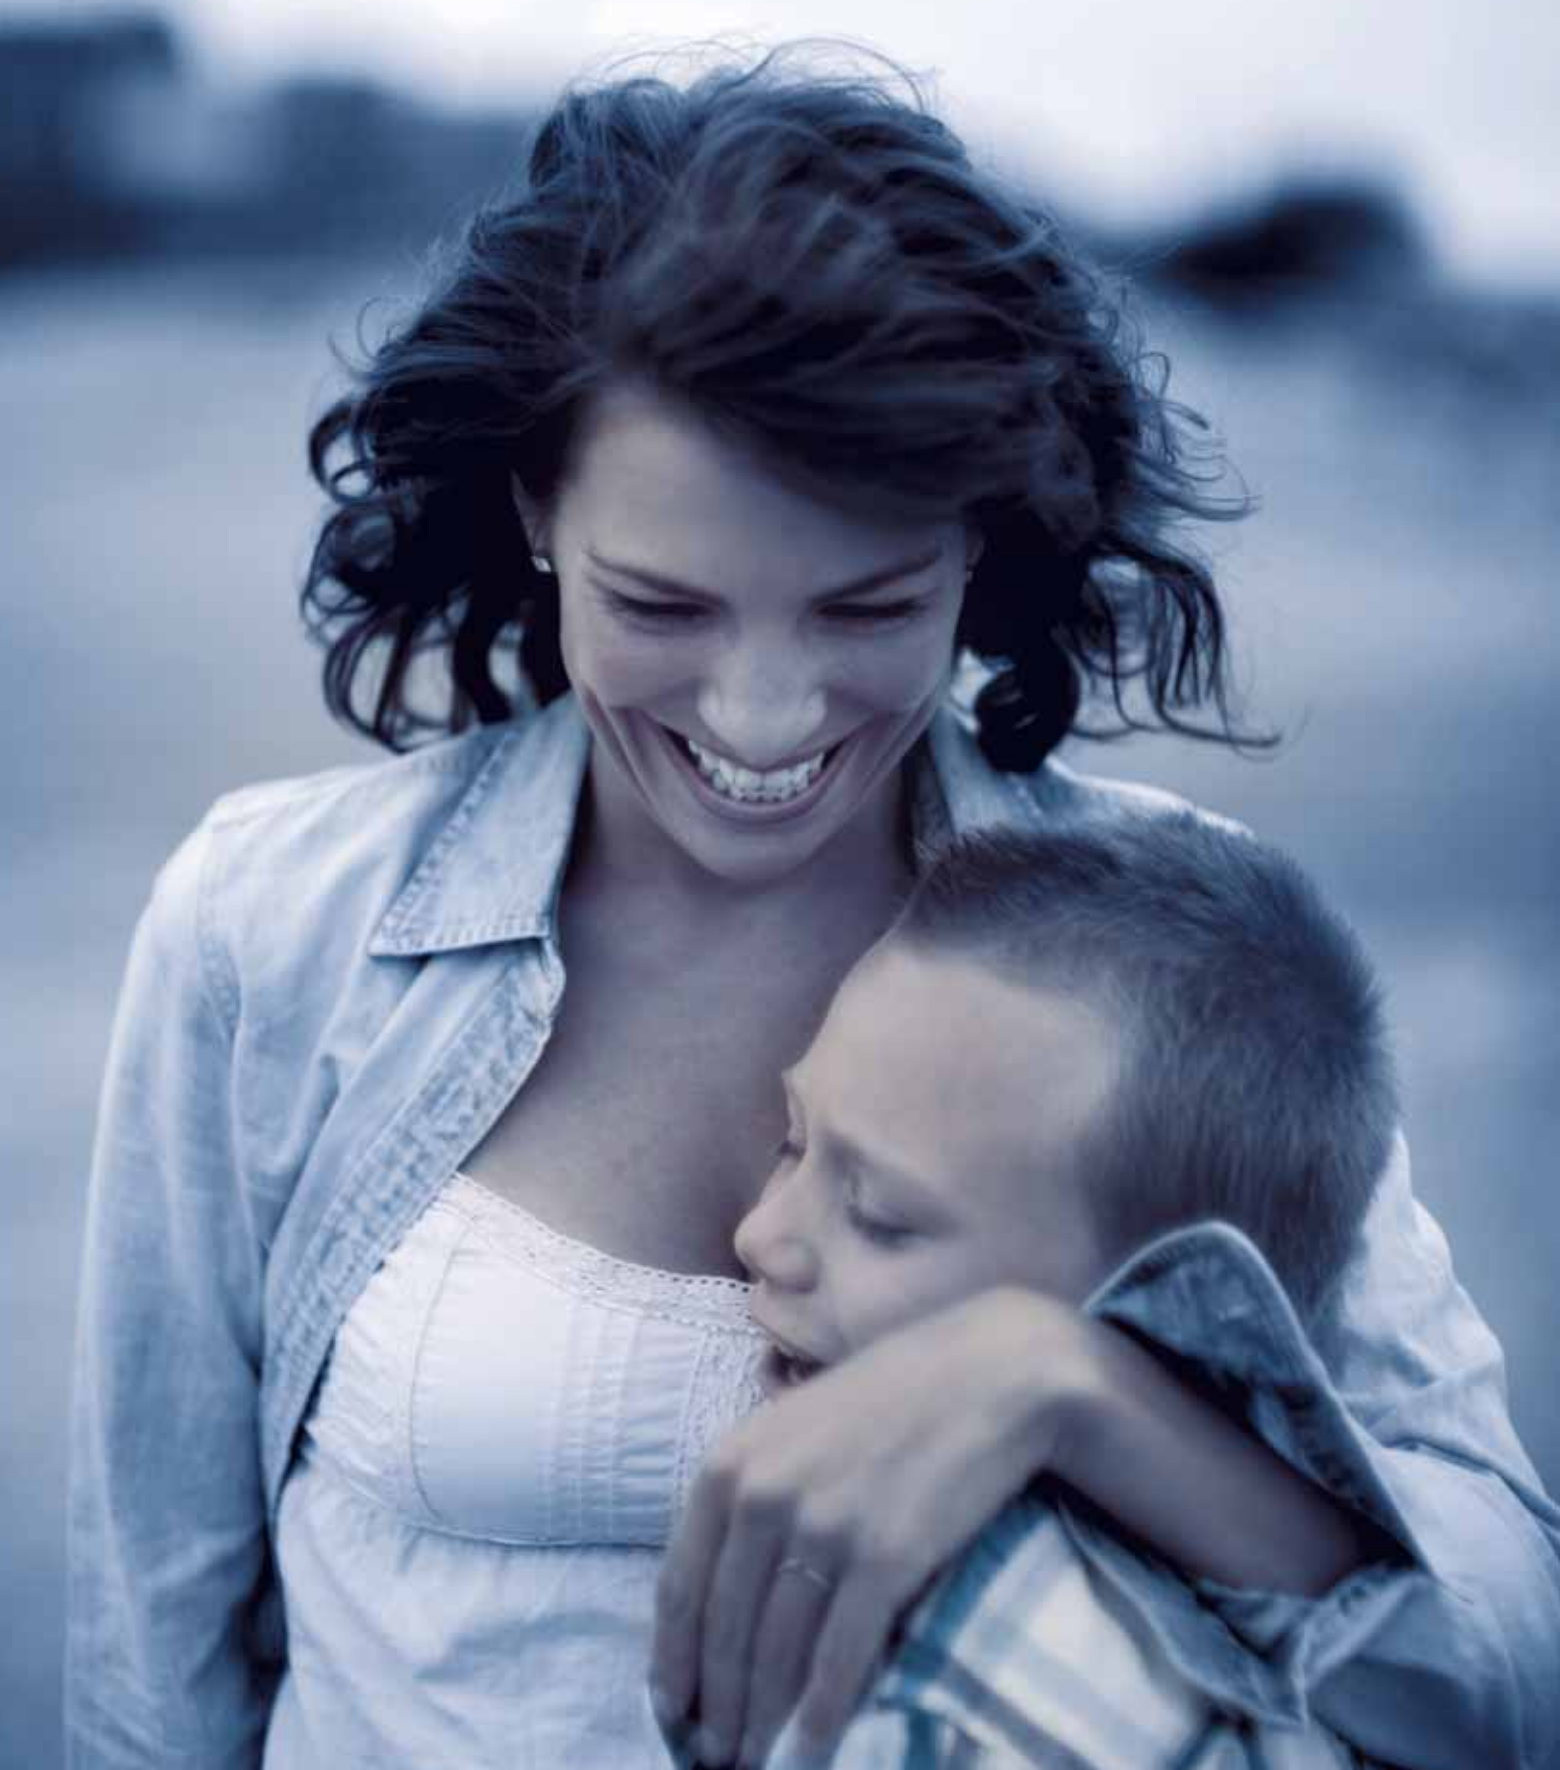

Neuropharmacology & Neurophysiology | Neurodegeneration

Wyeth® © 2007, Wyeth Pharmaceuticals Inc., Philadelphia, PA 19101 200918-01 March 2007

She couldn't imagine  
her future without depression.  
But we can.

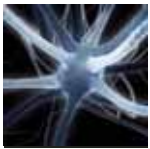

**Wyeth Neuroscience** believes that everyone deserves a healthier tomorrow. That's why Wyeth is building one of the world's leading pipelines focused on such challenging disease areas as depression, schizophrenia, bipolar disorder, Alzheimer's disease, stroke, and pain. Our passion for research and development has produced innovative therapies that make a real difference for millions of patients. Already recognized as having a top 10 pipeline, Wyeth continues to develop new drugs that we hope will change the future of health care. Because every discovery brings new hope for patients everywhere.

In addition to Wyeth.com, please visit a site dedicated entirely to neuroscience—[WyethNeuroscience.com](http://WyethNeuroscience.com).

**Wyeth**  
Neuroscience | *Research. Education. Innovation.*<sup>™</sup>

Pain | Schizophrenia & Bipolar Disorder | Depression & Anxiety

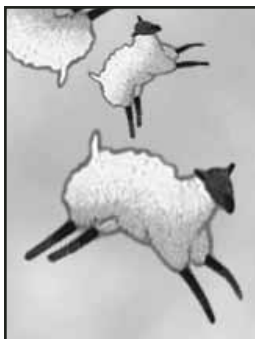

APA 2007 Annual Meeting sponsored by the American Psychiatric Association

# Making Every Sheep Count:

## Evidence-Based Approaches to Treating Insomnia

**Sunday, May 20, 2007**

1:00 – 1:30 PM Lunch

1:30 – 4:30 PM Symposium

Marriott San Diego Hotel & Marina

Marina Ballroom, South Tower, Level 3

333 West Harbor Drive

San Diego, California

### Educational Objectives

At the end of this educational activity participants should be able to

1. Summarize the neural circuitry and physiological regulation of sleep, wakefulness, and circadian rhythms in humans. Relate the neurobiology of sleep to insomnia and its daytime consequences
2. Describe the emerging evidence regarding interactions between sleep, circadian rhythms, and psychiatric disorders
3. Explain the biological basis for nonpharmacologic treatments of insomnia and nightmare disorders, and apply the basic elements of these treatments in clinical practice
4. Discuss new developments and new treatment targets for pharmacologic management of insomnia

### Accreditation

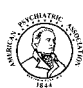

The American Psychiatric Association (APA) is accredited by the Accreditation Council for Continuing Medical Education to provide continuing medical education for physicians.

The APA designates this educational activity of a maximum of 3 AMA PRA category 1 Credits<sup>SM</sup>. Physicians should only claim credit commensurate with the extent of their participation in the activity.

Attendees must be registered for the APA Annual Meeting to attend this symposium. Seating is limited and will be based on first-come, first-served. For more information about the meeting, please visit the APA web site at [www.psych.org](http://www.psych.org) or contact the APA toll free at 1-888-357-7924 (within the US or Canada) or 703-907-7300.

Registered conference participants and registered guests may attend an industry supported symposium at the APA meeting.

Sponsored by the American Psychiatric Association

Supported by an educational grant from Takeda Pharmaceuticals North America.

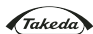

### Agenda

1:30-1:40 PM **Opening Remarks**

*Daniel J. Buysse, MD—Chairman*

*University of Pittsburgh School of Medicine*

1:40-2:10 PM **The Clinical Neuroscience of Sleep and Insomnia**

*Daniel J. Buysse, MD*

2:10-2:40 PM **Comorbidity Between Insomnia and Psychiatric Illness**

*Meera Narasimhan, MD*

*University of South Carolina School of Medicine*

2:40-3:10 PM **Novel Pharmacological Targets for the Management of Insomnia**

*Ruth M. Benca, MD, PhD*

*University of Wisconsin-Madison*

3:10-3:40 PM **Innovative Behavioral Approaches for Treating Insomnia and Comorbid Psychiatric Illness**

*Karl Doghranji, MD*

*Thomas Jefferson University*

3:40-4:25 PM **Panel Discussion**

*Faculty Panel*

APA 2007 Annual Meeting Sponsored by the American Psychiatric Association

# WEIGHING THE RISKS AND BENEFITS OF ATYPICAL ANTIPSYCHOTICS:

## CAN WE HAVE OUR CAKE AND EAT IT TOO?

**SUNDAY, MAY 20, 2007**

**Dinner: 6:30-7:00 PM**

**Symposium: 7:00-10:00 PM**

**Manchester Grand Hyatt San Diego**

**Douglas Pavilion C/D**

**One Market Place**

**San Diego, California**

### Agenda

7:00 PM **Opening Remarks**

*Henry A. Nasrallah, MD – Chairman • University of Cincinnati College of Medicine*

7:05 **High Morbidity and Mortality in Schizophrenia and Bipolar Disorder: What, Why, and How?\***

*Quinton E. Moss, MD • University of Cincinnati College of Medicine*

7:35 **Metabolic Complications in the Context of Antipsychotic Effectiveness:**

**Lessons from the CATIE Schizophrenia Trial\***

*Donald C. Goff, MD • Harvard Medical School*

8:05 **The Dual Health Jeopardy in Schizophrenia: Highly Prevalent Metabolic Disorders and Low Access to Medical Treatment\***

*Henry A. Nasrallah, MD*

8:35 **Lessons From ATP III, the ADA, and the APA Workgroup on Antipsychotics and Metabolic Risk\***

*John W. Newcomer, MD • Washington University School of Medicine*

9:05 **Patient, Provider, and System Approaches to Reducing Risk of Poor Health in Patients Receiving Antipsychotics\***

*Lisa B. Dixon, MD, MPH • University of Maryland School of Medicine, VA Capitol Health Care Network MIRECC*

9:35 **Question and Answer**

10:00 **Closing Remarks**

### Educational Objectives

At the end of this educational activity participants should be able to

1. Review the epidemiological studies demonstrating high rates of morbidity and mortality in schizophrenia and bipolar disorder patients.
2. Discuss the high prevalence of the metabolic syndrome in the Clinical Antipsychotic Trials of Intervention Effectiveness (CATIE) sample and the low rates of treatment for it.
3. Compare and contrast the metabolic profiles of antipsychotics in the CATIE study.
4. Identify potential patient, provider and system level interventions to improve metabolic outcomes among patients treated with antipsychotic medications.

### Accreditation/Support

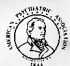

The American Psychiatric Association (APA) is accredited by the Accreditation Council for Continuing Medical Education to provide continuing medical education for physicians.

The APA designates this educational activity of a maximum of 3 AMA PRA Category 1 Credits<sup>SM</sup>. Physicians should only claim credit commensurate with the extent of their participation in the activity.

Attendees must be registered for the APA Annual Meeting to attend this symposium. Seating is limited and will be on a first-come, first-served basis. For more information about the meeting, please visit the APA web site at [www.psych.org](http://www.psych.org) or contact the APA toll free at 1-888-357-7924 (within the US or Canada) or 703-907-7300.

Registered conference participants and registered guests may attend an industry supported symposium at the APA meeting.

Co-supported by an educational grant from

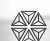

**Bristol-Myers Squibb**

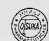

**OTSUKA AMERICA PHARMACEUTICAL, INC.**

\*Each presentation will include 5 minutes for audience questions.

# Dark Horizons: Depression and Cognitive Impairment

Sunday, May 20, 2007  
Breakfast: 7:30 - 8:00 AM  
Scientific Program: 8:00 - 11:00 AM

*Held at the APA 2007 Annual Meeting*  
Manchester Grand Hyatt  
Manchester Ballroom, Second Level  
San Diego, California

## Agenda

### 7:30 AM Breakfast

#### 8:00 Welcome and Introduction

Steven P. Roose, MD – Chairman  
Columbia University, College of Physicians and Surgeons  
New York State Psychiatric Institute

#### 8:10 The Epidemiology and Genetic Studies of Depression and Memory\*

Richard Mayeux, MD, MSc  
Columbia University, College of Physicians and Surgeons  
New York State Psychiatric Institute

#### 8:40 The Biology of Depression and Dementia\*

Gary W. Small, MD  
David Geffen School of Medicine at UCLA

#### 9:10 Vascular Depression and Vascular Dementia\*

K. Ranga R. Krishnan, MB, ChB  
Duke University Medical Center

#### 9:40 The Course of Treatment for Patients With Questionable Dementia\*

D.P. Devanand, MD  
Columbia University, College of Physicians and Surgeons  
New York State Psychiatric Institute

#### 10:10 The Course of Treatment for Patients With Depression and Mild Cognitive Impairment\*

Roy Hamilton, MD, MS  
University of Pennsylvania

#### 10:40 Panel Discussion and Q & A Session

#### 11:00 Conclusion

\*Each presentation will include 5 minutes for audience questions.

The American Psychiatric Association (APA) is accredited by the Accreditation Council for Continuing Medical Education to provide continuing medical education for physicians.

The APA designates this educational activity for a maximum of 3 *AMA PRA Category 1 Credits™*. Physicians should only claim credit commensurate with the extent of their participation in the activity.

Attendees must be registered for the APA Annual Meeting to attend this symposium. Seating is limited and will be based on a first-come, first-served basis. For more information about the meeting, please visit the APA Web site at [www.psych.org](http://www.psych.org) or contact the APA toll free at 1-888-357-7924 (within the US or Canada) or (703) 907-7300.

## Educational Objectives:

- Evaluate the data that older adults with depressive symptoms are at a higher risk for the development of dementia.
- Identify the neurochemical and neurobiologic changes that occur in patients with recurrent depression and how these changes may influence the development of dementia.
- Review the concept of vascular depression and poststroke depression and discuss whether patients with these disorders progress to vascular dementia.
- Understand the phenomenology and course of treatment for patients with mild cognitive impairment with no depressive symptoms to determine the phenomenologic fate of this group.
- Identify treatment options available to patients with combined mood and memory disorders, particularly to review whether effective treatments can forestall the devastating impact of these illnesses in a late-life population.

Sponsored by the American Psychiatric Association

Supported by an educational grant from Forest Pharmaceuticals, Inc.

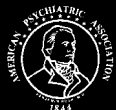

 **Forest Pharmaceuticals, Inc.**  
Pharmaceuticals • Therapeutics • Healthcare • Ethicare • Managed Care • Specialty Sales



**FIGHT  
BECAUSE THE STAKES  
ARE HIGH**

Too many times I've seen how quickly the devastating effects of bipolar disorder can impact my patients' lives—and the damage that each episode can cause.

Families torn apart.  
Careers ravaged.  
Relationships destroyed.

The stakes are high.

As a doctor, I fight every day to make sure that bipolar disorder will not win out.

OL36807A 0206 ©2006, ELI LILLY AND COMPANY.  
ALL RIGHTS RESERVED.

*Lilly*

PRESENTED AT THE APA  
2007 ANNUAL MEETING  
IN SAN DIEGO, CA

Tuesday, May 22, 2007 ♦ 7:00–10:00 pm  
San Diego Convention Center Ballroom 20, Upper Level

# Cigarette Smoking, Smoking Cessation, AND Psychiatric Illness

## PROGRAM AGENDA

6:30–7:00 pm

### Dinner

7:00–7:10 pm

### Introduction

*Alexander H. Glassman, MD  
(Chair)*

Columbia University College  
of Physicians and Surgeons  
New York State Psychiatric  
Institute

7:10–7:35 pm

### Reward Systems Underlying Motivation and Addiction

*Peter W. Kalivas, PhD*  
Medical University of  
South Carolina

7:35–8:00 pm

### Animal Modeling and Integrative Neurocircuitry of Addiction Vulnerability in Mental Illness

*R. Andrew Chambers, MD*  
Indiana University School  
of Medicine

8:00–8:25 pm

### Pharmacotherapies for Smoking Cessation

*Cheryl Oncken, MD, MPH*  
University of Connecticut  
Health Center

8:25–8:50 pm

### What Makes Smoking Cessation Unique in Patients with a History of Depression?

*Alexander H. Glassman, MD*  
Columbia University College  
of Physicians and Surgeons  
New York State Psychiatric  
Institute

8:50–9:15 pm

### Pharmacological Treatment of Nicotine Dependence in Schizophrenia: The Devil Is in the Details

*Tony P. George, MD, FRCPC*  
University of Toronto  
Centre for Addiction  
and Mental Health

9:15–10:00 pm

### Panel Discussion/Q&A

## LEARNING OBJECTIVES

At the conclusion of this symposium, the participant should be able to:

- Recognize the unique risks of cigarette smoking for patients with psychiatric illness.
- Discuss common neurobiology underlying all addictions.
- Compare and contrast smoking addiction in patients with depression and schizophrenia.
- Outline tools and treatments for smoking cessation in patients with and without psychiatric illness.

Supported by an educational  
grant from

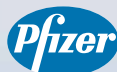

Sponsored by the American  
Psychiatric Association

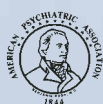

## REGISTRATION

Attendees must be registered for the APA Annual Meeting to attend this symposium. Seating is limited and will be based on first-come, first-served. For more information about the meeting, please visit the APA website at [www.psych.org](http://www.psych.org) or contact the APA toll-free at 1-888-357-7924 (within the U.S. or Canada) or 703-907-7300.

## CREDIT DESIGNATION

The APA designates this educational activity for a maximum of 3 *AMA PRA Category 1 Credits*<sup>™</sup>. Physicians should only claim credit commensurate with the extent of their participation in the activity.

## ACCREDITATION STATEMENT

The American Psychiatric Association (APA) is accredited by the Accreditation Council for Continuing Medical Education to provide continuing medical education for physicians.

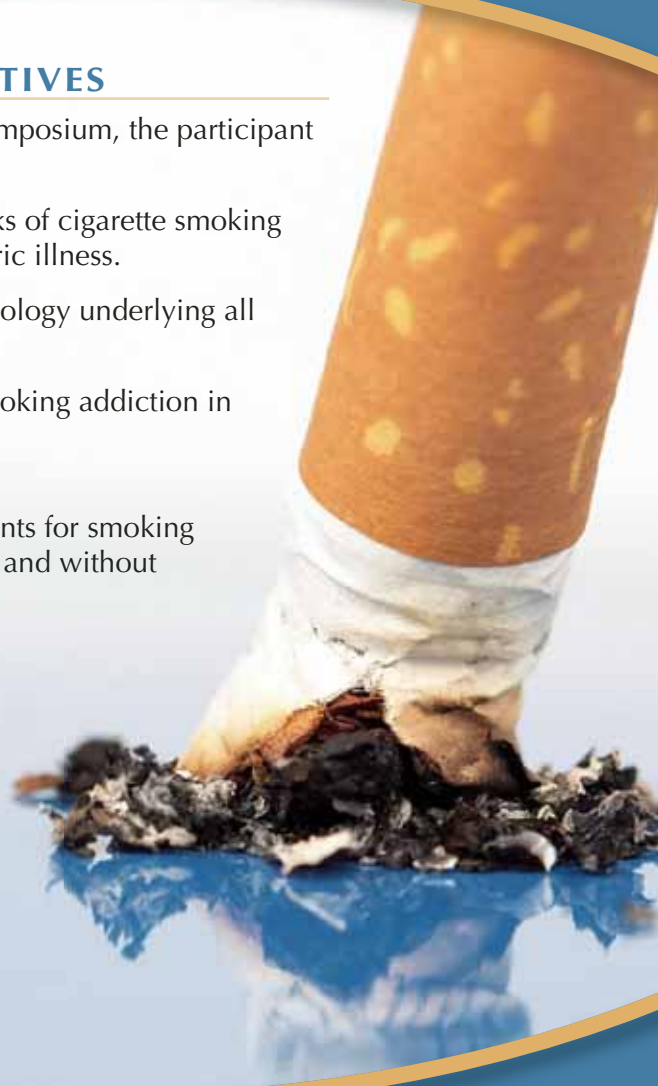

# A POWERFUL SSRI that's well tolerated

#1  
PRESCRIBED  
SRI  
BY PSYCHIATRISTS\*

For **DEPRESSION**  
and **ANXIETY**

**UP TO 90%** of depressed patients  
present with symptoms of anxiety<sup>2</sup>

**PROVEN EFFICACY** for Major Depressive Disorder  
and Generalized Anxiety Disorder<sup>3</sup>

**Lexapro**  
escitalopram oxalate   
**POWER TO ENJOY LIFE™**

**IMPORTANT SAFETY INFORMATION** – Depression is a serious condition that can lead to suicidal thoughts and behavior. Antidepressants increased the risk of suicidal thinking and behavior (2% to 4%) in short-term studies of 9 antidepressant drugs in children and adolescents with major depressive disorder (MDD) and other psychiatric disorders. Patients started on therapy should be observed closely for clinical worsening, suicidality, or unusual changes in behavior, especially at the beginning of therapy or at the time of dose changes. This risk may persist until significant remission occurs. Families and caregivers should be advised of the need for close observation and communication with the prescriber. **Lexapro is not approved for use in pediatric patients.**

Lexapro is contraindicated in patients taking monoamine oxidase inhibitors (MAOIs), pimozone (see DRUG INTERACTIONS – Pimozone and Celexa), or in patients with hypersensitivity to escitalopram oxalate. As with other SSRIs, caution is indicated in the coadministration of tricyclic antidepressants (TCAs) with Lexapro. As with other psychotropic drugs that interfere with serotonin reuptake, patients should be cautioned regarding the risk of bleeding associated with the concomitant use of Lexapro with NSAIDs, aspirin, or other drugs that affect coagulation. The most common adverse events with Lexapro versus placebo (approximately 5% or greater and approximately 2x placebo) were nausea, insomnia, ejaculation disorder, somnolence, increased sweating, fatigue, decreased libido, and anorgasmia.

**References:** 1. IMS National Prescription Audit. Twelve-month rolling average. November 2006. 2. Sadock BJ, Sadock VA. *Kaplan and Sadock's Synopsis of Psychiatry: Behavioral Sciences/Clinical Psychiatry*. 9th ed. Philadelphia, Pa: Lippincott Williams & Wilkins; 2003:552. 3. LEXAPRO [package insert]. St Louis, Mo: Forest Pharmaceuticals, Inc.; 2006.

Please see brief summary of prescribing information for LEXAPRO on following page.

©2005 Forest Laboratories, Inc. 41-1006637R1 4/07

Visit the LEXAPRO website at [www.lexapro.com](http://www.lexapro.com)





# KNOW THE FACTS

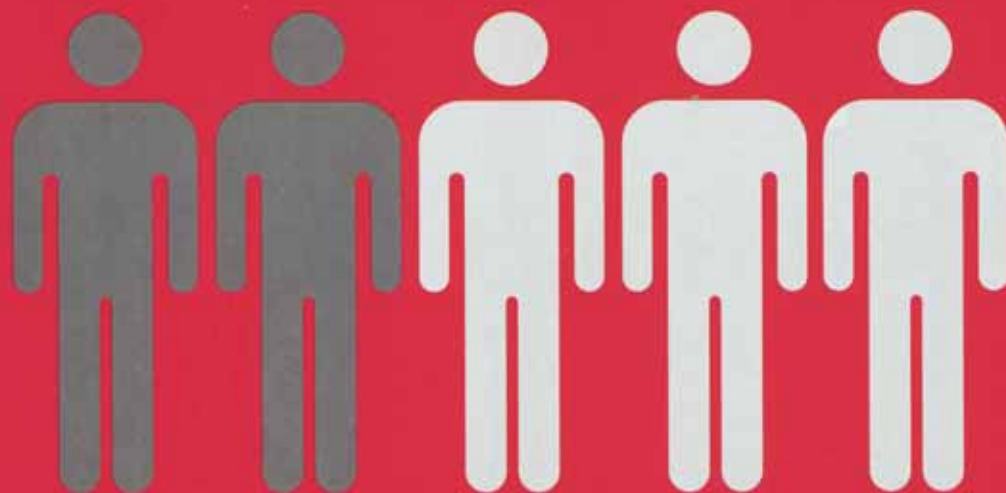

**41% of all patients had the metabolic syndrome at baseline in the landmark CATIE schizophrenia study.<sup>2</sup>**

Be aware.  
Screen and monitor your patients.  
Make a difference.

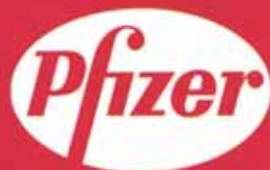

For more information, please visit [www.MDLinx.com/metabolicmatters](http://www.MDLinx.com/metabolicmatters)

**References:** 1. Goff DC, Sullivan LM, McEvoy JP, et al. A comparison of ten-year cardiac risk estimates in schizophrenia patients from the CATIE study and matched controls. *Schizophr Res.* 2005;80:45-53. 2. McEvoy JP, Meyer JM, Goff DC, et al. Prevalence of the metabolic syndrome in patients with schizophrenia: baseline results from the Clinical Antipsychotic Trials of Intervention Effectiveness (CATIE) schizophrenia trial and comparison with national estimates from NHANES III. *Schizophr Res.* 2005;80:19-32.

# KNOW THE FACTS

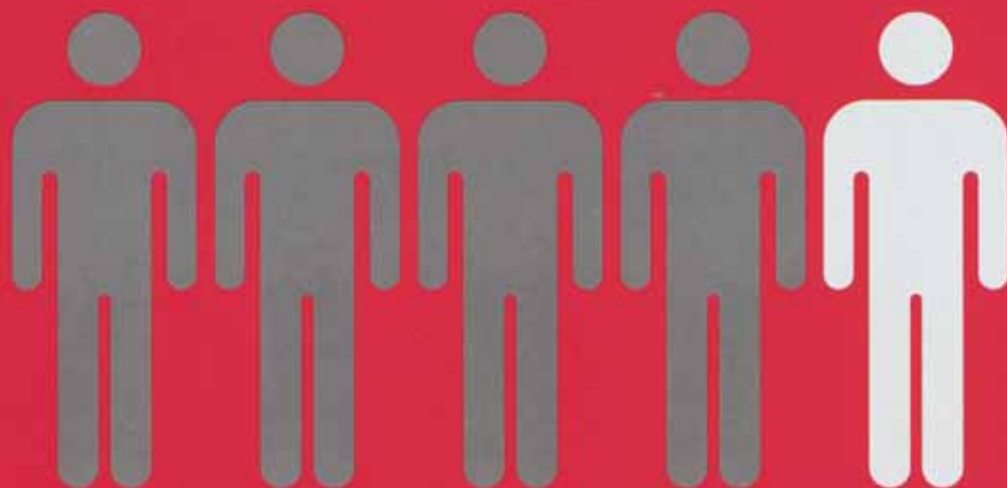

**13% of patients had diabetes in the landmark CATIE schizophrenia study at baseline—4 times more common than in the general population.<sup>1</sup>**

Be aware.  
Screen and monitor your patients.  
Make a difference.

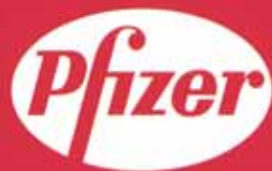

For more information, please visit [www.MDLinx.com/metabolicmatters](http://www.MDLinx.com/metabolicmatters)

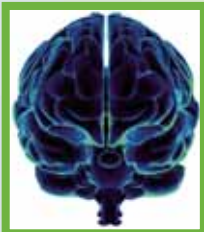

# CARING for OUR MOST CHALLENGING PATIENTS with DEPRESSION: *An Interactive Forum on Novel Treatments*

PRESENTED AT THE APA 2007 ANNUAL MEETING IN SAN DIEGO, CA

Sunday, May 20, 2007 • 1:30 p.m.– 4:30 pm  
Manchester Grand Hyatt, Manchester Ballroom, Second Level

## CREDIT DESIGNATION

The APA designates this educational activity for a maximum of 3 *AMA PRA Category 1 Credits™*. Physicians should only claim credit commensurate with the extent of their participation in the activity.

## ACCREDITATION STATEMENT

The American Psychiatric Association (APA) is accredited by the Accreditation Council for Continuing Medical Education to provide continuing medical education for physicians.

## REGISTRATION

Attendees must be registered for the APA Annual Meeting to attend this symposium. Seating is limited and will be based on first-come, first-served. For more information about the meeting, please visit the APA website at [www.psych.org](http://www.psych.org) or contact the APA toll-free at 1-888-357-7924 (within the U.S. or Canada) or 703-907-7300.

## PROGRAM AGENDA

- 1:00 p.m. **Lunch**
- 1:30 p.m. **Introduction**  
Charles B. Nemeroff, MD, PhD (Chair)  
*Emory University School of Medicine*
- 1:45 p.m. **Mechanism of Action of Vagus Nerve Stimulation (VNS)**  
Charles B. Nemeroff, MD, PhD  
*Emory University School of Medicine*
- 2:15 p.m. **Assessing the Efficacy of VNS in Patients with TRD**  
Paul Holtzheimer, MD  
*Emory University School of Medicine*
- 2:45 p.m. **Efficacy of Repetitive Transcranial Magnetic Stimulation (rTMS) and Magnetic Seizure Therapy (MST)**  
Thomas E. Schlaepfer, MD  
*University Hospital Bonn  
The Johns Hopkins University School of Medicine*
- 3:15 p.m. **Mechanism of Action and Efficacy of Deep Brain Stimulation**  
Helen Mayberg, MD  
*Emory University School of Medicine*
- 3:45 p.m. **Panel Discussion/Q&A**
- 4:30 p.m. **Conclusion**

## LEARNING OBJECTIVES

At the conclusion of this symposium, the participant should be able to:

1. Identify criteria used to recognize patients with treatment-resistant depression (TRD).
2. Compare and contrast somatic interventions for TRD.
3. Recognize the neurobiological substrates of investigational treatments for refractory depression.

Supported by an educational grant from

**Cyberonics®**

Sponsored by the American Psychiatric Association

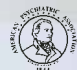

For the treatment of attention deficit hyperactivity disorder (ADHD)

# CONCERTA® CAN MAKE A DIFFERENCE

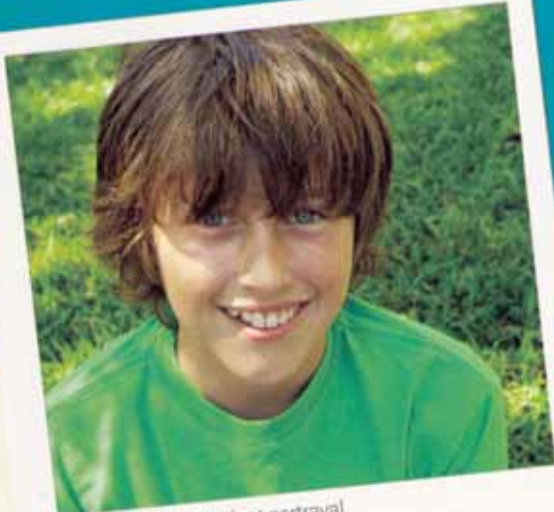

Representative patient portrayal

Meet Matthew, age 12, who has ADHD Combined Type with comorbid ODD\*

- Doesn't finish tests or schoolwork
- Forgets to do homework and chores
- Argues with teachers and parents

\*ODD=Oppositional Defiant Disorder; CD=Conduct Disorder.

## Consider CONCERTA® to give Matthew the help he needs

- Reduces ADHD symptoms in children with ADHD and ODD/CD\* as well as in patients with ADHD alone<sup>1</sup>
- Improves academic performance and classroom behavior in children with ADHD<sup>2</sup>
- Significantly reduces ADHD symptoms and conflict with family members in adolescents with ADHD<sup>3</sup>

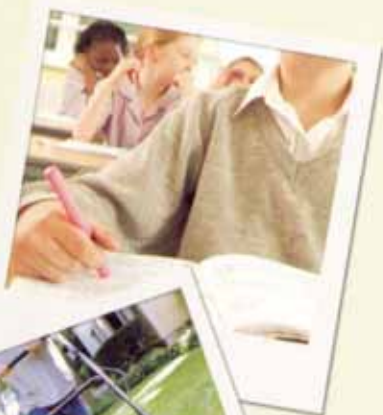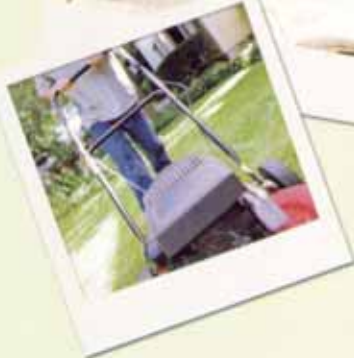

### Important Safety Information

CONCERTA® is indicated for the treatment of ADHD in children and adolescents. CONCERTA® should not be taken by patients with: significant anxiety, tension, or agitation; allergies to methylphenidate or other ingredients in CONCERTA®; glaucoma; Tourette's syndrome, tics, or family history of Tourette's syndrome; current/recent use of monoamine oxidase inhibitors (MAOIs). Children under 6 years of age should not take CONCERTA®. Abuse of methylphenidate may lead to dependence.

Use with caution in patients with psychosis, bipolar disorder, history of seizures/EEG abnormalities, and hypertension. CONCERTA® should not be used in patients with pre-existing severe gastrointestinal narrowing, known structural cardiac abnormalities, or other serious heart problems. Stimulants may cause new psychotic or manic symptoms; discontinuation of treatment may be appropriate. Aggressive behavior or hostility should be monitored in patients beginning treatment. Methylphenidate may produce difficulties with accommodation and blurring of vision. Hematologic monitoring is advised during prolonged therapy.

The most common adverse events reported in children aged 6 to 12 years receiving up to 54 mg were headache (14%), upper respiratory tract infection (8%), and abdominal pain (7%). The most common adverse events reported in adolescents receiving up to 72 mg were headache (9%), accidental injury (6%), and insomnia (5%).

Please see brief summary of full prescribing information and references on next page.

For more information, call 1-888-440-7903  
or visit [www.concerta.net](http://www.concerta.net)

ONCE-DAILY

**CONCERTA®**  
methylphenidate HCl

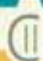

Extended-release tablets: 18 mg, 27 mg, 36 mg, 54 mg

*Delivering results that matter*

CON07-034

CONCERTA® and DRDS® are registered trademarks of ALZA Corporation.

© McNeil Pediatrics, Division of McNeil-PPC, Inc., 2007

Expires 6/08



FOR THE TREATMENT OF SCHIZOPHRENIA

NEW

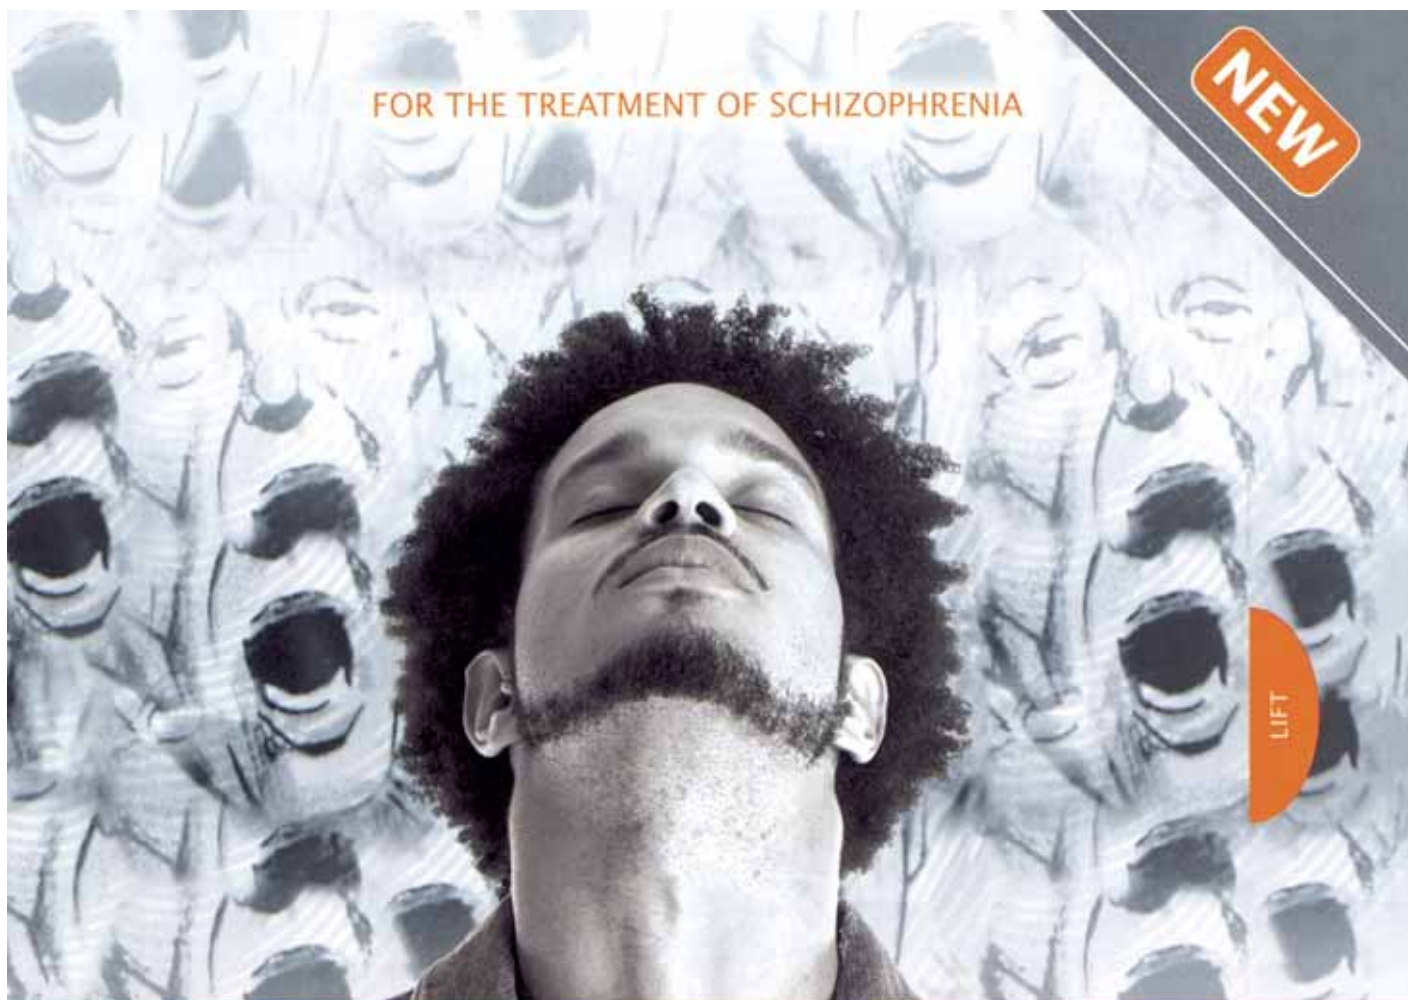

LIFT

He Needs a Powerful Antipsychotic for His Mind

But What Will It Do to His Body?

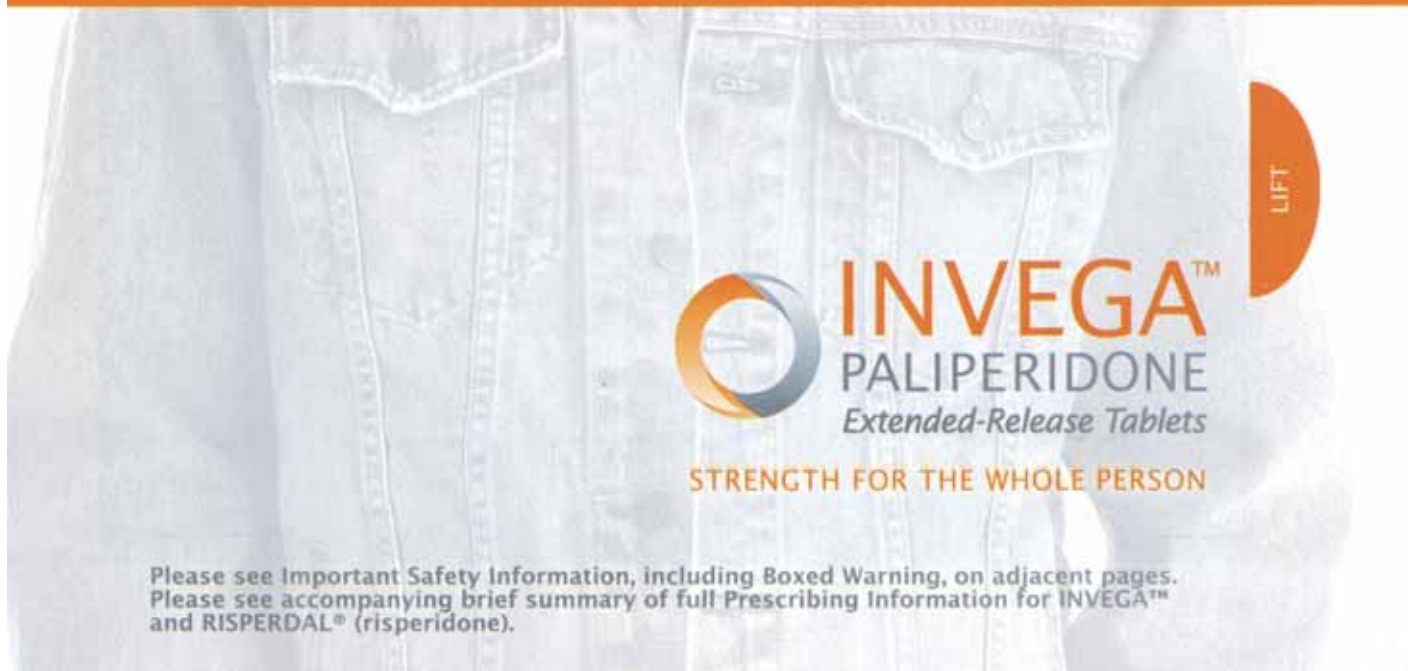

LIFT

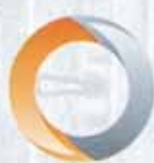

**INVEGA™**  
PALIPERIDONE  
*Extended-Release Tablets*

STRENGTH FOR THE WHOLE PERSON

Please see Important Safety Information, including Boxed Warning, on adjacent pages. Please see accompanying brief summary of full Prescribing Information for INVEGA™ and RISPERDAL® (risperidone).

# A NEW ORAL ATYPICAL ANTIPSYCHOTIC FOR THE TREATMENT OF SCHIZOPHRENIA

INTRODUCING

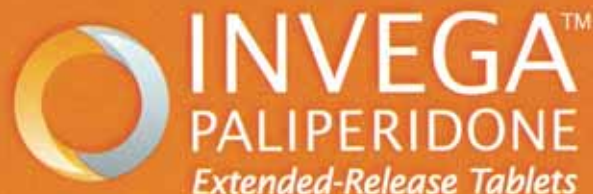

STRENGTH FOR THE WHOLE PERSON

## IMPORTANT SAFETY INFORMATION FOR INVEGA™ AND RISPERDAL®

### Increased Mortality in Elderly Patients with Dementia-Related Psychosis

Elderly patients with dementia-related psychosis treated with atypical antipsychotic drugs are at an increased risk of death compared to placebo. Analyses of 17 placebo-controlled trials (modal duration of 10 weeks) in these patients revealed a risk of death in the drug-treated patients of between 1.6 to 1.7 times that seen in placebo-treated patients. Over the course of a typical 10-week controlled trial, the rate of death in drug-treated patients was about 4.5%, compared to a rate of about 2.6% in the placebo group. Although the causes of death were varied, most of the deaths appeared to be either cardiovascular (e.g., heart failure, sudden death) or infectious (e.g., pneumonia) in nature. Neither INVEGA™ (paliperidone) nor RISPERDAL® (risperidone) are approved for the treatment of patients with Dementia-Related Psychosis.

INVEGA and RISPERDAL are indicated for the treatment of schizophrenia.

**Commonly observed adverse events:** The most commonly observed adverse events, occurring at an incidence of  $\geq 5\%$  and at least 2 times placebo, were **INVEGA:** akathisia and extrapyramidal disorder; **RISPERDAL:** anxiety, somnolence, extrapyramidal symptoms, dizziness, constipation, nausea, dyspepsia, rhinitis, rash, and tachycardia.

**QT Prolongation:** INVEGA causes a modest increase in the corrected QT (QTc) interval. INVEGA should be avoided in combination with other drugs that are known to prolong the QTc interval, in patients with congenital long QT syndrome or a history of cardiac arrhythmias. Certain circumstances may increase the risk of torsades de pointes and/or sudden death in association with the use of drugs that prolong the QTc interval.

**Neuroleptic Malignant Syndrome (NMS):** NMS, a potentially fatal symptom complex, has been reported with the use of antipsychotic medications, including INVEGA and RISPERDAL. Clinical manifestations include muscle rigidity, fever, altered mental status and evidence of autonomic instability (see full Prescribing Information). Management should include immediate discontinuation of antipsychotic drugs and other drugs not essential to concurrent therapy, intensive symptomatic treatment and medical monitoring, and treatment of any concomitant serious medical problems.

**Tardive Dyskinesia (TD):** TD is a syndrome of potentially irreversible, involuntary, dyskinetic movements that may develop in patients treated with antipsychotic medications. The risk of developing TD and the likelihood that dyskinetic movements will become irreversible are believed to increase with duration of treatment and total cumulative dose. Elderly patients appeared to be at increased risk for TD. Prescribing should be consistent with the need to minimize the risk of TD. The syndrome may remit, partially or completely, if antipsychotic treatment is withdrawn.

**Hyperglycemia and Diabetes:** Hyperglycemia, some cases extreme and associated with ketoacidosis or hyperosmolar coma or death, has been reported in patients treated with atypical antipsychotics (APS). Patients starting treatment with APS who have or are at risk for diabetes should undergo fasting blood glucose testing at the beginning of and during treatment. Patients who develop symptoms of hyperglycemia should also undergo fasting blood glucose testing.

Please see accompanying brief summary of full Prescribing Information for INVEGA and RISPERDAL.

NEW

## Powerful Efficacy for the Mind With Safety and Tolerability for the Body

### INVEGA combines:

- The active metabolite of RISPERDAL® (risperidone)
- Innovative OROS® extended-release technology

### INVEGA demonstrated:

- Significant efficacy in the positive and negative symptoms of schizophrenia<sup>1</sup>
- Low weight gain and EPS rates comparable with placebo in 6-week trials with the recommended 6-mg dose<sup>1\*</sup>

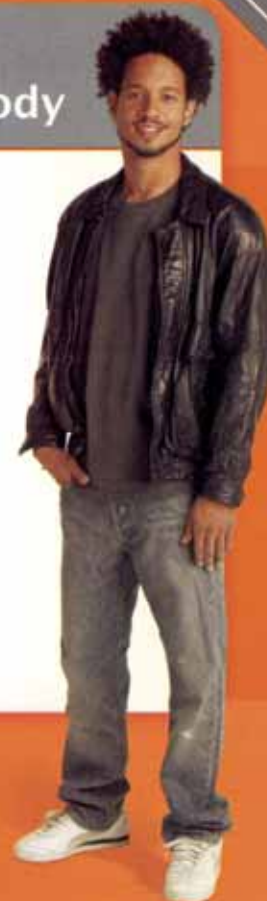

Please visit [www.invega.com](http://www.invega.com).

**Gastrointestinal:** INVEGA should ordinarily not be administered to patients with pre-existing severe gastrointestinal narrowing. Rare instances of obstructive symptoms have been reported in patients with known strictures taking nondeformable formulations. INVEGA should only be used in patients who are able to swallow the tablet whole.

**Cerebrovascular Adverse Events (CAEs):** CAEs, including fatalities, have been reported in elderly patients with dementia-related psychosis taking atypical antipsychotics in clinical trials. Neither INVEGA nor RISPERDAL are approved for treating these patients.

**Seizures:** INVEGA and RISPERDAL should be used cautiously in patients with a history of seizures.

**Hyperprolactinemia:** As with other drugs that antagonize dopamine D<sub>2</sub> receptors, INVEGA and RISPERDAL elevate prolactin levels and the elevation persists during chronic administration.

**Suicide:** The possibility of suicide attempt is inherent in psychotic illnesses and close supervision of high-risk patients should accompany drug therapy.

**Orthostatic Hypotension:** INVEGA and RISPERDAL may induce orthostatic hypotension associated with dizziness, tachycardia, and in some patients, syncope, especially during the initial dose-titration period. Monitoring should be considered in patients for whom this may be of concern. INVEGA and RISPERDAL should be used with caution in patients with known cardiovascular disease, and conditions that would predispose patients to hypotension.

**Potential for Cognitive and Motor Impairment:** INVEGA and RISPERDAL have the potential to impair judgment, thinking, or motor skills. Caregivers and patients should use caution until they are reasonably certain that INVEGA and RISPERDAL do not affect them adversely.

**Maintenance Treatment:** Physicians who elect to use INVEGA and RISPERDAL for extended periods should periodically re-evaluate the long-term risks and benefits of the drug for the individual patient.

**Weight Gain:** The proportion of subjects having a weight gain of  $\geq 7\%$  body weight were comparable to placebo (5%) for 3 mg (7%) and 6 mg (6%). A higher incidence was seen for 9 mg (9%) and 12 mg (9%).

**\*Extrapyramidal Symptoms (EPS):** Total EPS-related adverse events in the higher 9-mg and 12-mg treatment groups were 25% and 26%, respectively, versus 11% for the placebo group.

OROS is a registered trademark of ALZA Corporation.  
RISPERDAL is a registered trademark of Janssen, L.P.

Reference: 1. Data on file. Janssen LP, Titusville, NJ.

© Janssen, L.P. 2007. May 2007. 01JN169R1

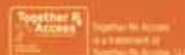

  
Janssen









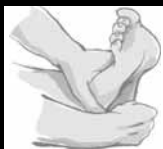

# PSYCHIATRY

## BOARD REVIEW SERIES

### THE KAUFMAN COURSES

SPONSORED BY MONTEFIORE MEDICAL CENTER CREDIT DESIGNATED BY ALBERT EINSTEIN COLLEGE OF MEDICINE  
 Accreditation Statement: Albert Einstein College of Medicine is accredited by the  
 Accreditation Council for Continuing Medical Education (ACCME) to provide continuing medical education for physicians.

#### CLINICAL NEUROLOGY FOR PSYCHIATRISTS

**David Myland Kaufman, MD**

This intensive three-day weekend course, offered for the 35th year, is designed for psychiatrists in practice and in residency as an update or board preparation. Focusing on essential topics, the course will use lectures, extensive syllabus, and the new edition of Clinical Neurology for Psychiatrists, David M. Kaufman (6th edition, Elsevier).

AMA Statement: Albert Einstein College of Medicine designates this educational activity for a maximum of 25 AMA PRA Category 1 Credit(s).™ Physicians should only claim credit commensurate with the extent of their participation in the activity.

#### LOS ANGELES

The Westin Hotel at the Los Angeles Airport  
 5400 West Century Boulevard, Los Angeles, CA 90045  
 Friday, September 7 to Sunday, September 9, 2007  
 7:45 AM – 5:00 PM

#### NEW YORK

The Graduate Center, Concourse Level  
 City University of New York (CUNY)  
 Friday, October 5 to Sunday, October 7, 2007  
 8:15 AM – 5:15 PM

#### PSYCHIATRY FOR PSYCHIATRISTS

**Andrea J. Weiss, MD and David Myland Kaufman, MD**

This two-day course will be a pre-test that will complement standard psychiatry review courses and complete the review in Clinical Neurology for Psychiatrists. In this course, an expert group of faculty who are experienced and well-informed about modern psychiatry and test-taking strategies will present essential information through a series of test-type questions utilizing audience response system keypads and using answers for discussions and explanations.

AMA Statement: Albert Einstein College of Medicine designates this educational activity for a maximum of 14 AMA PRA Category 1 Credit(s).™ Physicians should only claim credit commensurate with the extent of their participation in the activity.

#### LOS ANGELES

The Westin Hotel at the Los Angeles Airport  
 5400 West Century Boulevard, Los Angeles, CA 90045  
 Monday, September 10 to Tuesday, September 11, 2007  
 7:45 AM – 5:00 PM

#### NEW YORK

The Graduate Center, Concourse Level  
 City University of New York (CUNY)  
 Monday, October 8 to Tuesday, October 9, 2007  
 8:15 AM – 5:15 PM

#### MAINTENANCE OF CERTIFICATION (THE RECERT COURSE)

**Dan Smuckler, MD, Andrea J. Weiss, MD and David Myland Kaufman, MD**

This intensive two-day course designed for psychiatrists will review the psychiatric information likely to appear on the recertification examination. It will cover current evidence-based treatments for psychiatric disorders, emphasizing clinical matters and advances in diagnosis and treatment. Presentation of the material will be in a mixed format, with both lecture and question and answer utilizing audience response system keypads.

AMA Statement: Albert Einstein College of Medicine designates this educational activity for a maximum of 14.5 AMA PRA Category 1 Credit(s).™ Physicians should only claim credit commensurate with the extent of their participation in the activity.

#### NEW YORK

The Graduate Center, Main Level  
 City University of New York (CUNY)  
 365 Fifth Avenue (Between 34th and 35th Streets),  
 New York, NY 10016  
 Friday, February 1 to Saturday, February 2, 2008  
 8:15 AM – 5:15 PM

#### FOR MORE INFORMATION

- Web site Course Information or To Register: [www.cnfp.org](http://www.cnfp.org)
- E-mail: [cme@montefiore.org](mailto:cme@montefiore.org)
- Write: CCME, 3301 Bainbridge Avenue, Bronx, NY 10467
- Call: 718-920-6674 • Fax: 718-798-2336

#### FAST TRACK REGISTRATION FORM... OR YOU CAN REGISTER ON-LINE AT [www.cnfp.org](http://www.cnfp.org)

|                                  |                                                                    |                                                                         |                                                                                         |
|----------------------------------|--------------------------------------------------------------------|-------------------------------------------------------------------------|-----------------------------------------------------------------------------------------|
| I Will Attend/Check One:         |                                                                    | Make checks payable to <u>Montefiore Medical Center</u> or charge my    |                                                                                         |
| Clinical Neurology Psychiatrists | <input type="checkbox"/> <b>Los Angeles</b><br>Sept. 7-9 (Fri-Sun) | <input type="checkbox"/> <b>New York City</b><br>Oct. 5-7 for (Fri-Sun) | Visa <input type="checkbox"/> MC <input type="checkbox"/> AMEX <input type="checkbox"/> |
| Psychiatry: Pre-Test             | <input type="checkbox"/> Sept. 10-11 (Mon-Tues)                    | <input type="checkbox"/> Oct. 8-9 (Mon-Tues)                            | _____                                                                                   |
| Maintenance of Certification     | <input type="checkbox"/> Not Available                             | <input type="checkbox"/> Feb. 1-2 (Fri-Sat)                             | Exp: ____ / ____                                                                        |
|                                  | Check One:                                                         |                                                                         | Signature _____                                                                         |
|                                  | <input type="checkbox"/> <b>Practicing Physicians</b>              | <input type="checkbox"/> <b>Residents &amp; Fellows</b>                 | Name _____ Degree _____                                                                 |
| Clinical Neurology (Course)      | <input type="checkbox"/> \$975.00                                  | <input type="checkbox"/> \$850.00                                       | Address _____                                                                           |
| Psychiatry: Pre-Test (Course)    | <input type="checkbox"/> \$600.00                                  | <input type="checkbox"/> \$500.00                                       | City _____ State _____ Zip _____                                                        |
| Both courses                     | <input type="checkbox"/> \$1,300.00                                | <input type="checkbox"/> \$1,100.00                                     | Office Phone (____) _____                                                               |
| Text book only                   | <input type="checkbox"/> \$110.00                                  | <input type="checkbox"/> \$110.00                                       | Affiliation _____                                                                       |
| Maintenance of Certification     | <input type="checkbox"/> \$495.00                                  |                                                                         | e mail _____                                                                            |

Cancellation Policy: On written request, the registration fee is refundable, less \$95 administration fee, until three weeks prior to each course. No refunds will be made thereafter.

**For Additional Course Information And Sample Test Questions, Please Visit Our Web Site: [www.cnfp.org](http://www.cnfp.org)**

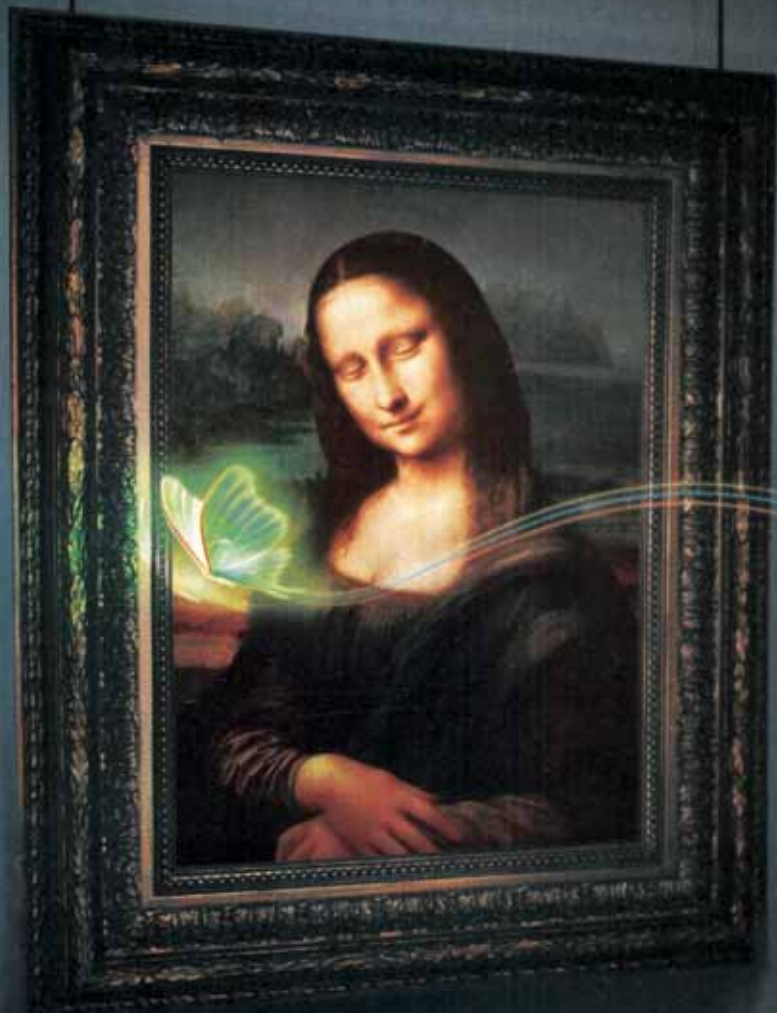

# MASTER THE FINE ART OF SLEEP

PRESCRIBE **LUNESTA**  
FIRST-LINE—FOR A FULL  
7 TO 8 HOURS OF SLEEP

LUNESTA has been studied in large, well-controlled clinical trials in **all** of the following patient types:

- ✓ Patients With Insomnia Comorbid With Major Depressive Disorder
- ✓ Patients With Insomnia Comorbid With Generalized Anxiety Disorder
- ✓ Patients With Insomnia Comorbid With Rheumatoid Arthritis
- ✓ Patients With Insomnia Comorbid With Menopause

The failure of insomnia to remit after 7 to 10 days of treatment should be medically evaluated.

LUNESTA is indicated for the treatment of insomnia. In controlled outpatient and sleep laboratory studies, LUNESTA administered at bedtime decreased sleep latency and improved sleep maintenance. LUNESTA is not indicated for the treatment of depression, generalized anxiety disorder, rheumatoid arthritis, or menopause.

#### Important Safety Information

LUNESTA, like other hypnotics, has CNS-depressant effects. Because of the rapid onset of action, LUNESTA should only be ingested immediately prior to going to bed or after the patient has gone to bed and has experienced difficulty falling asleep. Patients should not take LUNESTA unless they are prepared to get a full night's sleep. As with other hypnotics, patients receiving LUNESTA should be cautioned against engaging in hazardous occupations requiring complete mental alertness or motor coordination (eg, operating machinery or driving a motor vehicle) after ingesting the drug, including potential impairment of the performance of such activities that may occur the day following ingestion of LUNESTA. In clinical trials, the most common adverse events associated with LUNESTA were unpleasant taste, headache, somnolence, dizziness, dry mouth, infection, and pain.

LUNESTA has been classified as a Schedule IV controlled substance. Sedative hypnotics have produced withdrawal signs and symptoms following abrupt discontinuation. The risk of abuse and dependence increases with the dose and duration of treatment and concomitant use of other psychoactive drugs. The risk is also greater for patients who have a history of alcohol or drug abuse or history of psychiatric disorders. These patients should be under careful surveillance when receiving LUNESTA or any other hypnotic. Sedative/hypnotic drugs should be administered with caution to patients exhibiting signs and symptoms of depression. Suicidal tendencies may be present in such patients, and protective measures may be required. Intentional overdose is more common in this group of patients; therefore, the least amount of drug that is feasible should be prescribed for the patient at any one time.

LUNESTA, like other hypnotics, may produce additive CNS-depressant effects when coadministered with other psychotropic medications, anticonvulsants, antihistamines, ethanol, and other drugs that themselves produce CNS depression. LUNESTA should not be taken with alcohol. Dosage adjustment may be necessary when LUNESTA is administered with other CNS-depressant agents because of the potentially additive effects.

Impaired motor and/or cognitive performance after repeated exposure or unusual sensitivity to sedative/hypnotic drugs is a concern in the treatment of elderly and/or debilitated patients. See dosage and administration in complete prescribing information.

Please see brief summary of complete prescribing information.

Any night or every night

Leave the rest to...

**Lunesta**  
(eszopiclone)  
1, 2 AND 3 MG TABLETS

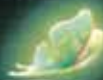



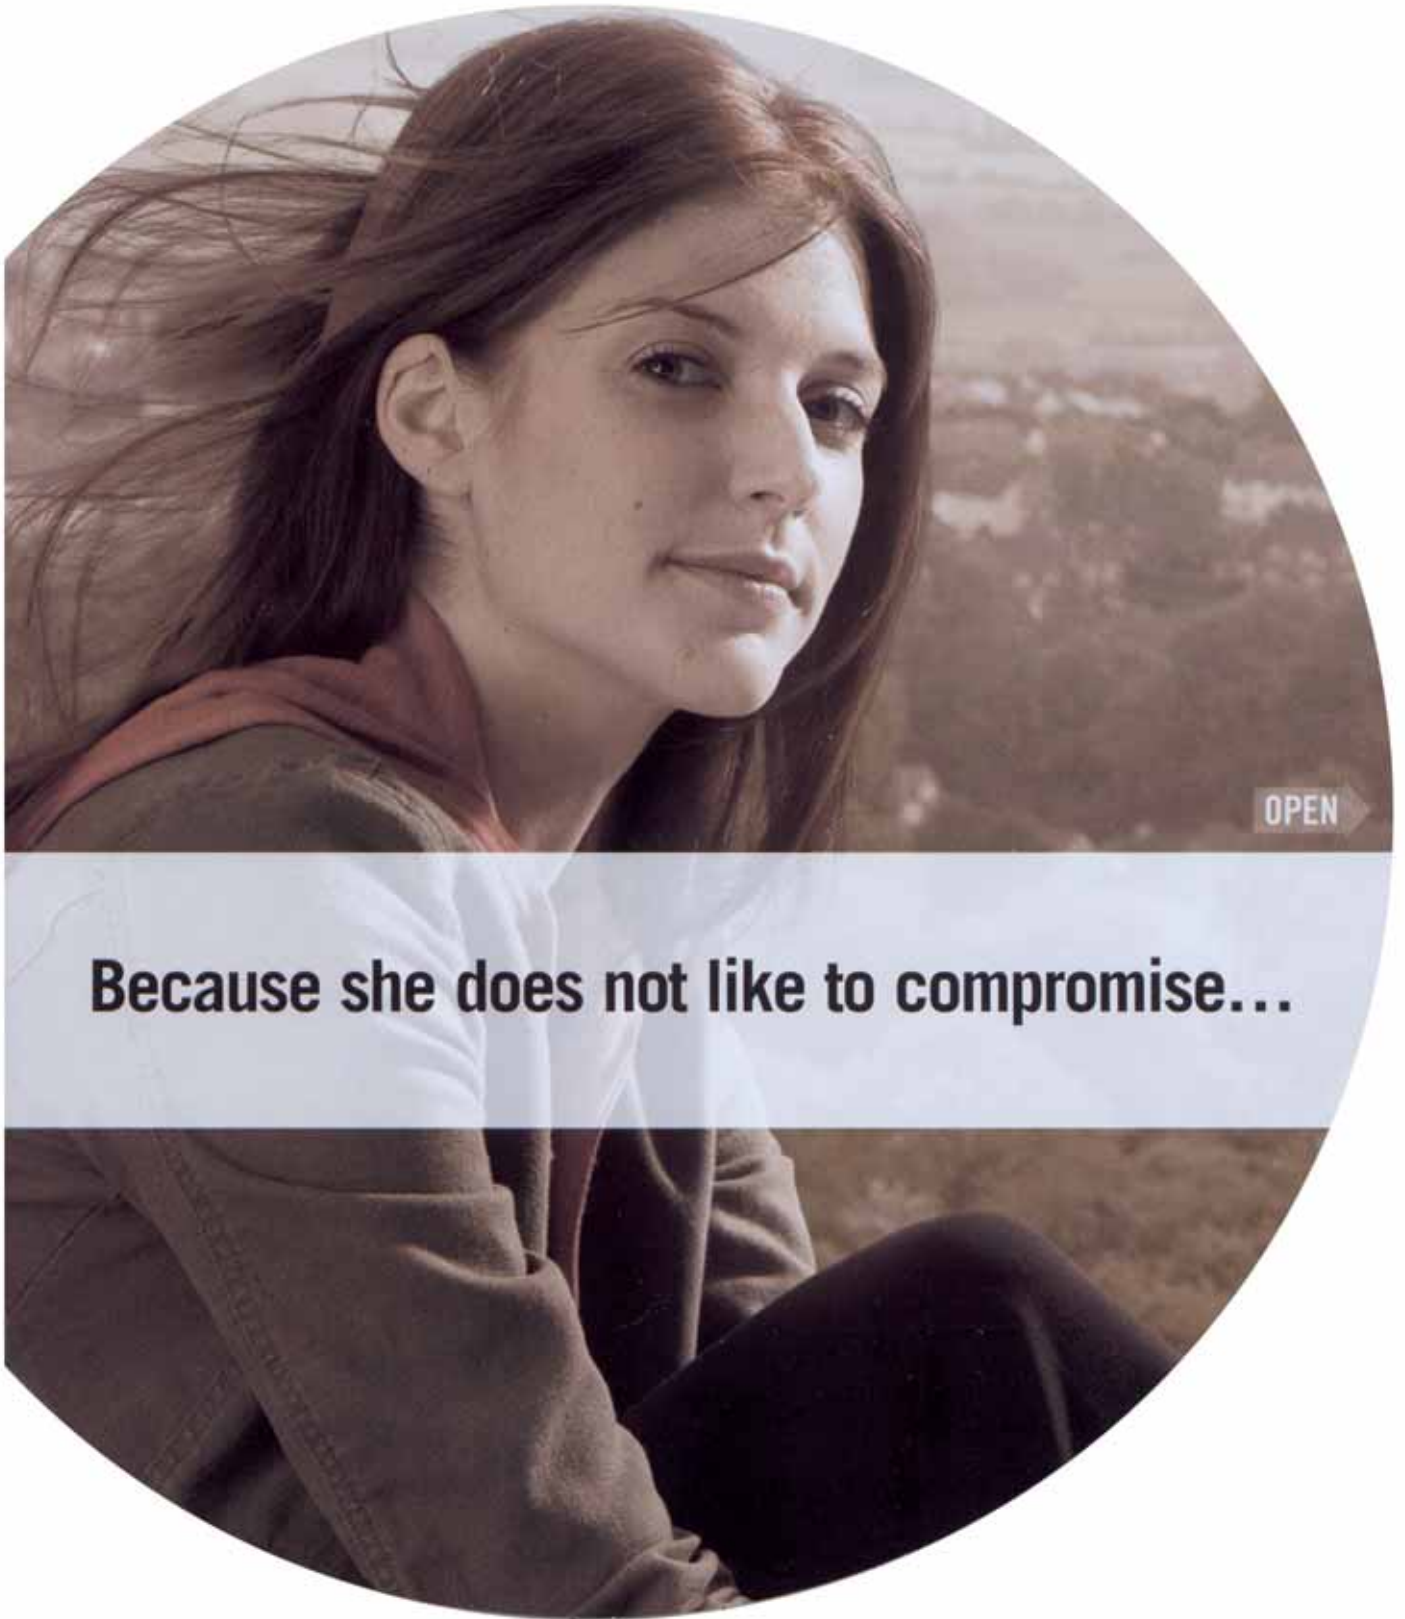

OPEN

**Because she does not like to compromise...**

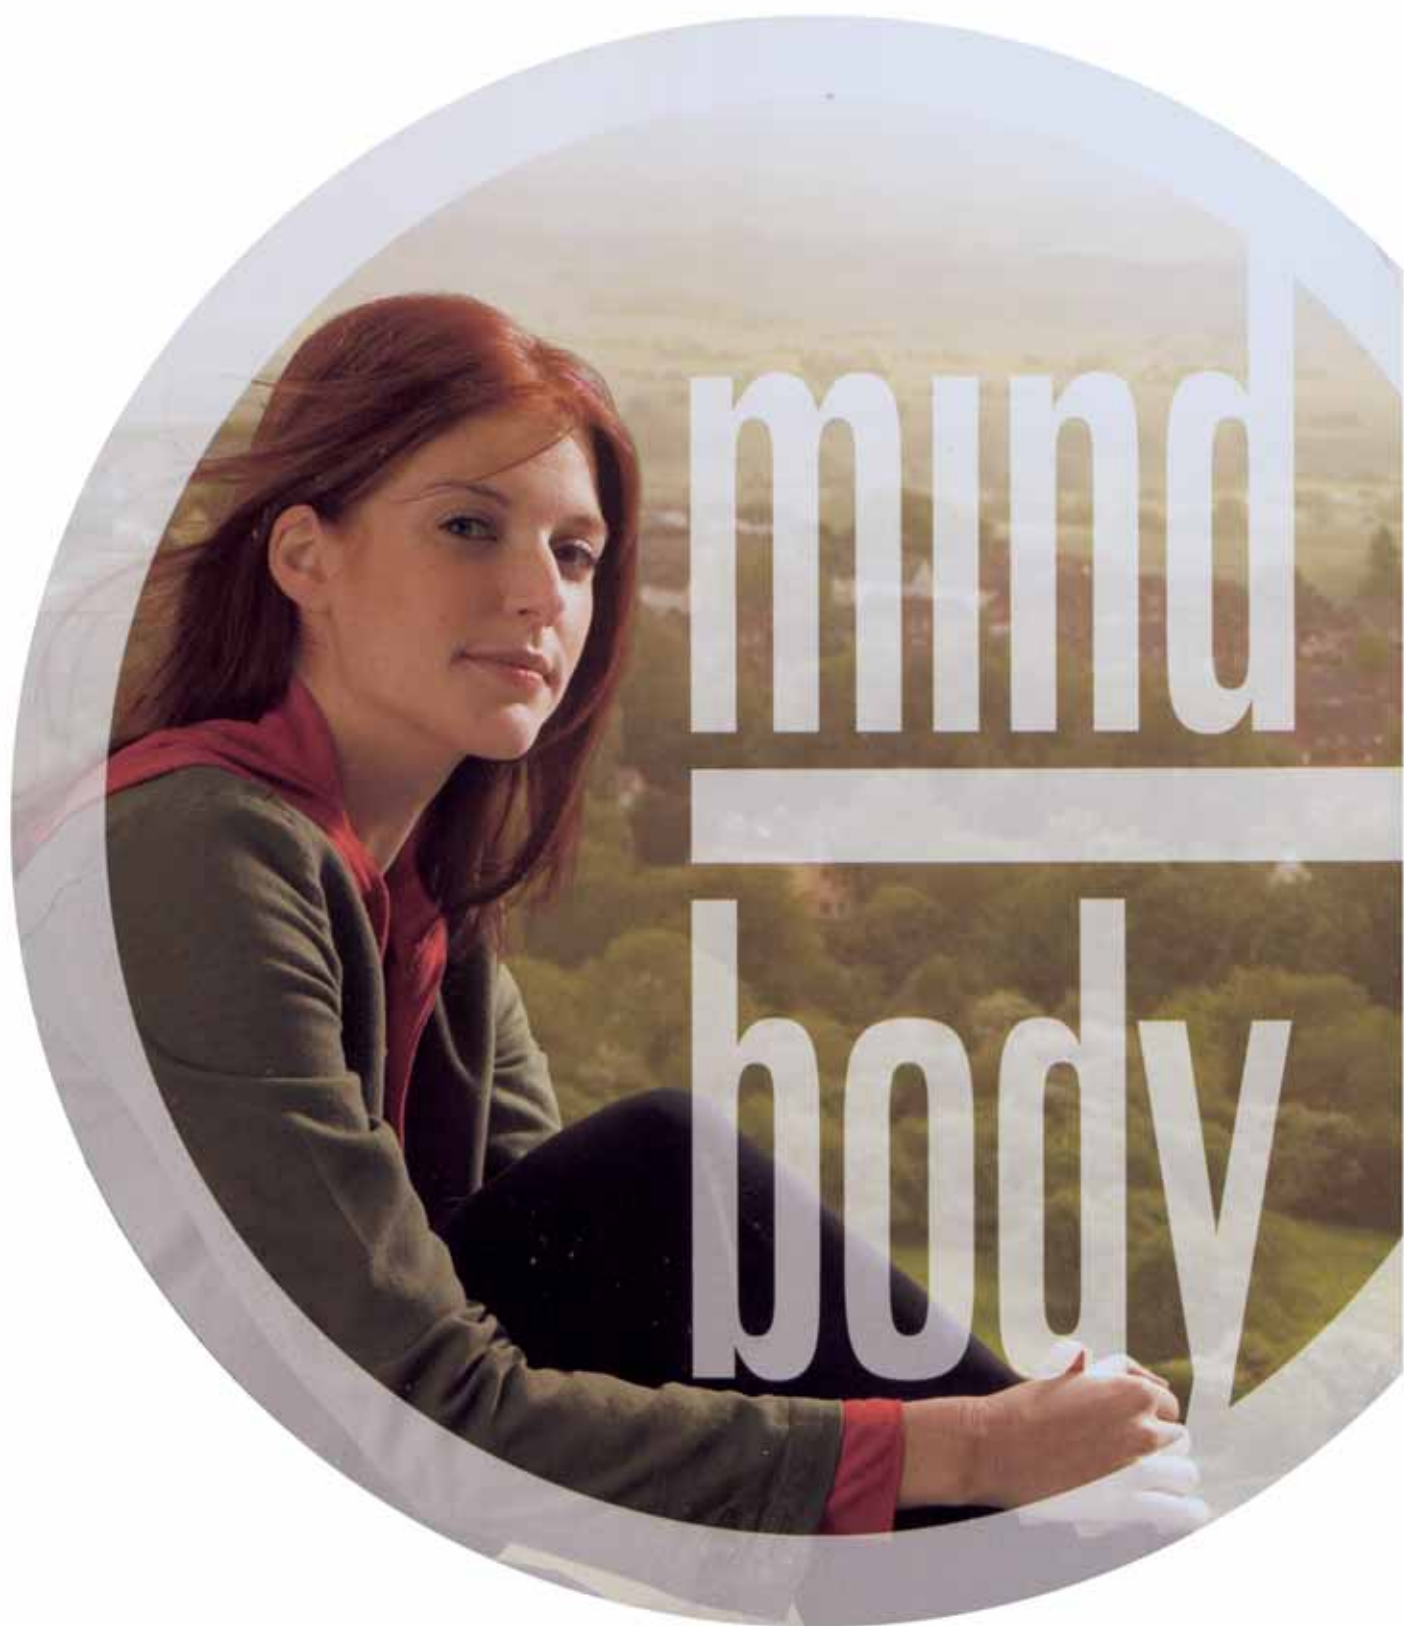

mind

body



IN SCHIZOPHRENIA

# Treat With the Body in Mind

CHOOSE COMPARABLE POWER...

Consistent results in acute head-to-head studies<sup>1-3</sup>

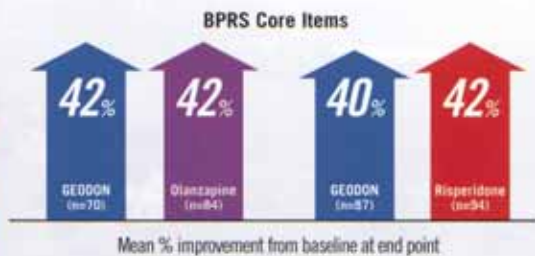

A 6-week, double-blind, randomized study of GEODON vs. olanzapine and an 8-week, double-blind, randomized study of GEODON vs. risperidone.

- BPRS core items include hallucinatory behavior, unusual thought content, conceptual disorganization, and suspiciousness
- Comparable efficacy was maintained in double-blind extension studies
  - up to 1 year vs risperidone<sup>1</sup>
  - up to 6 months vs olanzapine<sup>4</sup>

...WITHOUT COMPROMISING METABOLIC PARAMETERS

Significant results in switch studies after 1 year<sup>1,3</sup>

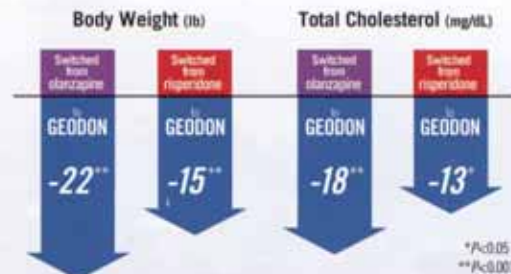

Two 1-year open-label extensions of 6-week, open-label switch studies in patients suboptimally controlled due to partial response or poor tolerability.

- Patients switching to GEODON from olanzapine and risperidone also experienced reductions in triglycerides<sup>5</sup>

In the acute head-to-head studies...

- In the GEODON vs olanzapine study, olanzapine significantly increased body weight (8 lb vs 2 lb for GEODON,  $P<0.0001$ )<sup>1,2</sup>
- In the GEODON vs risperidone study, risperidone increased body weight (2 lb vs 0 lb for GEODON,  $P<0.01$ )<sup>1,3</sup>

GEODON is indicated for the treatment of schizophrenia.

Elderly patients with dementia-related psychosis treated with atypical antipsychotic drugs are at an increased risk of death compared to placebo. GEODON is not approved for the treatment of patients with dementia-related psychosis.

GEODON is contraindicated in patients with a known history of QT prolongation, recent acute myocardial infarction, or uncompensated heart failure, and should not be used with other QT-prolonging drugs. GEODON has a greater capacity to prolong the QT<sub>c</sub> interval than several antipsychotics. In some drugs, QT prolongation has been associated with torsade de pointes, a potentially fatal arrhythmia. In many cases this would lead to the conclusion that other drugs should be tried first.

Hyperglycemia-related adverse events, sometimes serious, have been reported in patients treated with atypical antipsychotics. There have been few reports of hyperglycemia or diabetes in patients treated with GEODON, and it is not known if GEODON is associated with these events. Patients treated with an atypical antipsychotic should be monitored for symptoms of hyperglycemia.

In short-term schizophrenia trials, 10% of GEODON-treated patients experienced a weight gain of  $\geq 7\%$  of body weight vs 4% for placebo. In the same short-term trials, the most common adverse events were somnolence (14%) and respiratory tract infection (8%).

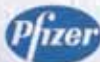

CHOOSE  
**GEODON**<sup>®</sup>  
(ziprasidone HCl) Oral Capsules

Please see brief summary of prescribing information, including boxed warning, on adjacent page.



JERALD KAY • ALLAN TASMAN • AARON T. BECK • JAMES F.T. BUGENTAL • GLEN O. GABBARD • JAY HALEY • OTTO KERNBERG • PETER D. KRAMER • TRACEY EELLS • ROBERT D. STOLOROW • GEORGE E. VAILLANT • IRVIN YALOM • E. JAMES ANTHONY • RICHARD D. CHESSICK • ROBERT COLES • HOWARD C. CUTLER • HABIB DAVANLOO • PAUL A. DEWALD • JOHN MARKOWITZ • WILLIAM N. GOLDSMID • PAUL CRITS-CHRISTOPH • ROBERT LANGS • ROBERT LANG • JAY HALEY • ALAN TASMAN • ARNOLD M. LUDWIG • JOEL YAGER • JOHN NORCROSS • JOHN MENNINGER • JOHN SPECTOR PERSON • T. BECK • JAMES F.T. BUGENTAL • JAY HALEY • ROBERT MOORE • IRVIN YALOM • RICHARD D. CHESSICK • DAVANLOO • N. GOLDSMID • LAZARUS • IRVIN YALOM • ANNA • FRED PINE • F.T. BUGENTAL • KERNBERG • STOLOROW • ANTHONY • HOWARD C. CUTLER • ROBERT LANGS •

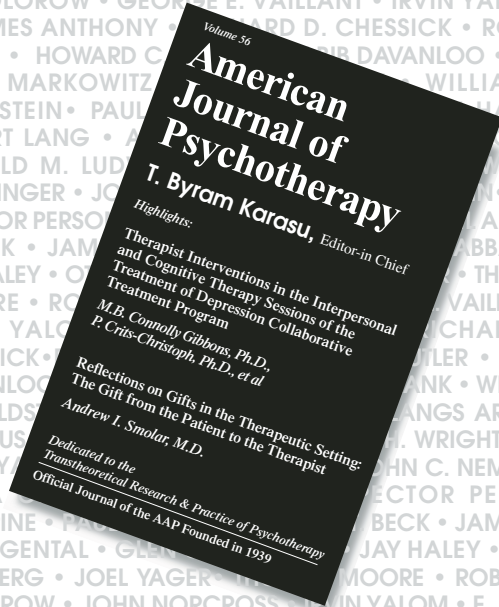

Incorporating the *Journal of Psychotherapy Practice and Research*  
 Published four times per annum: *American Journal of Psychotherapy*  
 Belfer Center, Room 405 • 1300 Morris Park Avenue • Bronx, NY 10461  
 Telephone: (718) 430-3503, FAX: (718) 430-8907  
 E-mail: info@ajp.org; Web site: www.ajp.org

# Psych Oral Board Tutorials

## Now, 3-day practice orals course limited to 20 students

- ◆ Opening sessions will teach oral exam skills
- ◆ Fees include doing two practice oral exams
- ◆ One live-patient and one video taped interview
- ◆ Each exam is 1¼ hours – time enough for hour interview and exam as well as faculty evaluation
- ◆ Senior faculty include former board examiners
- ◆ Weekend 4 to 10 weeks before your oral boards

**July 7-9, 2007 – Chicago**  
**December 2007 – TBA**

- ◆ In board exam city just before your oral boards

**June 5-7 – Indianapolis**  
**September 6-8 – Milwaukee**

- ◆ You may buy extra private and public practice exams based on patient interview or videotape

[www.psychtutor.net/m75a](http://www.psychtutor.net/m75a) 800-285-3283

**When you positively must pass**

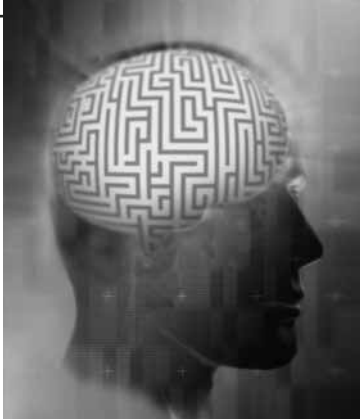

APA 2007 ANNUAL MEETING SPONSORED BY THE AMERICAN PSYCHIATRIC ASSOCIATION

## NAVIGATING THE COMPLEX MAZE OF BIPOLAR DISORDER

**Monday, May 21, 2007**

6:30 – 7:00 PM Dinner  
 7:00 – 10:00 PM Symposium  
 Manchester Grand Hyatt San Diego  
 Douglas Pavillion C/D  
 One Market Place  
 San Diego, California

### AGENDA

- 7:00–7:10 PM  
**Opening Remarks**  
*Prakash Masand, MD—Chairman*  
*Duke University Medical Center*
- 7:10–7:40 PM  
**Diagnostic Pitfalls in Patients with Bipolar Disorder**  
*Prakash Masand, MD*
- 7:40–8:10 PM  
**Managing the Bipolar Patient with Medical Comorbidities**  
*Andrea Fagiolini, MD*  
*University of Pittsburgh School of Medicine*
- 8:10–8:40 PM  
**Tailoring Antipsychotic Treatment to the Complex Patient with Bipolar Disorder**  
*Paul E. Keck, Jr., MD*  
*University of Cincinnati College of Medicine*
- 8:40–9:10 PM  
**Bringing Research to the Clinician: Lessons from STEP-BD**  
*Gary Sachs, MD*  
*Massachusetts General Hospital*
- 9:10–9:55 PM  
**Panel Discussion**  
*Faculty Panel*

### EDUCATIONAL OBJECTIVES

- At the end of this educational activity participants should be able to
- 1) List major obstacles to the diagnosis of bipolar disorder and describe strategies for distinguishing bipolar disorder from depression and agitated depression.
  - 2) Describe common psychiatric and medical comorbidities in bipolar patients, and their implications for treatment.
  - 3) Outline major findings from STEP-BD and their implications for clinical practice

### ACCREDITATION

The American Psychiatric Association (APA) is accredited by the Accreditation Council for Continuing Medical Education to provide continuing medical education for physicians.  
 The APA designates this educational activity of a maximum of 3 AMA PRA category 1 Credits™. Physicians should only claim credit commensurate with the extent of their participation in the activity.

Attendees must be registered for the 2007 APA Annual Meeting to attend this symposium. Seating is limited and will be on a first-come, first-served basis. For more information about the meeting, please visit the APA web site at [www.psych.org](http://www.psych.org) or contact the APA toll free at 1-888-357-7924 (within the US or Canada) or 703-907-7300.

Registered conference participants and registered guests may attend an industry-supported symposium at the APA meeting.

Sponsored by the American Psychiatric Association.

Supported by an educational grant from Pfizer, Inc.

# You Treat Depression...

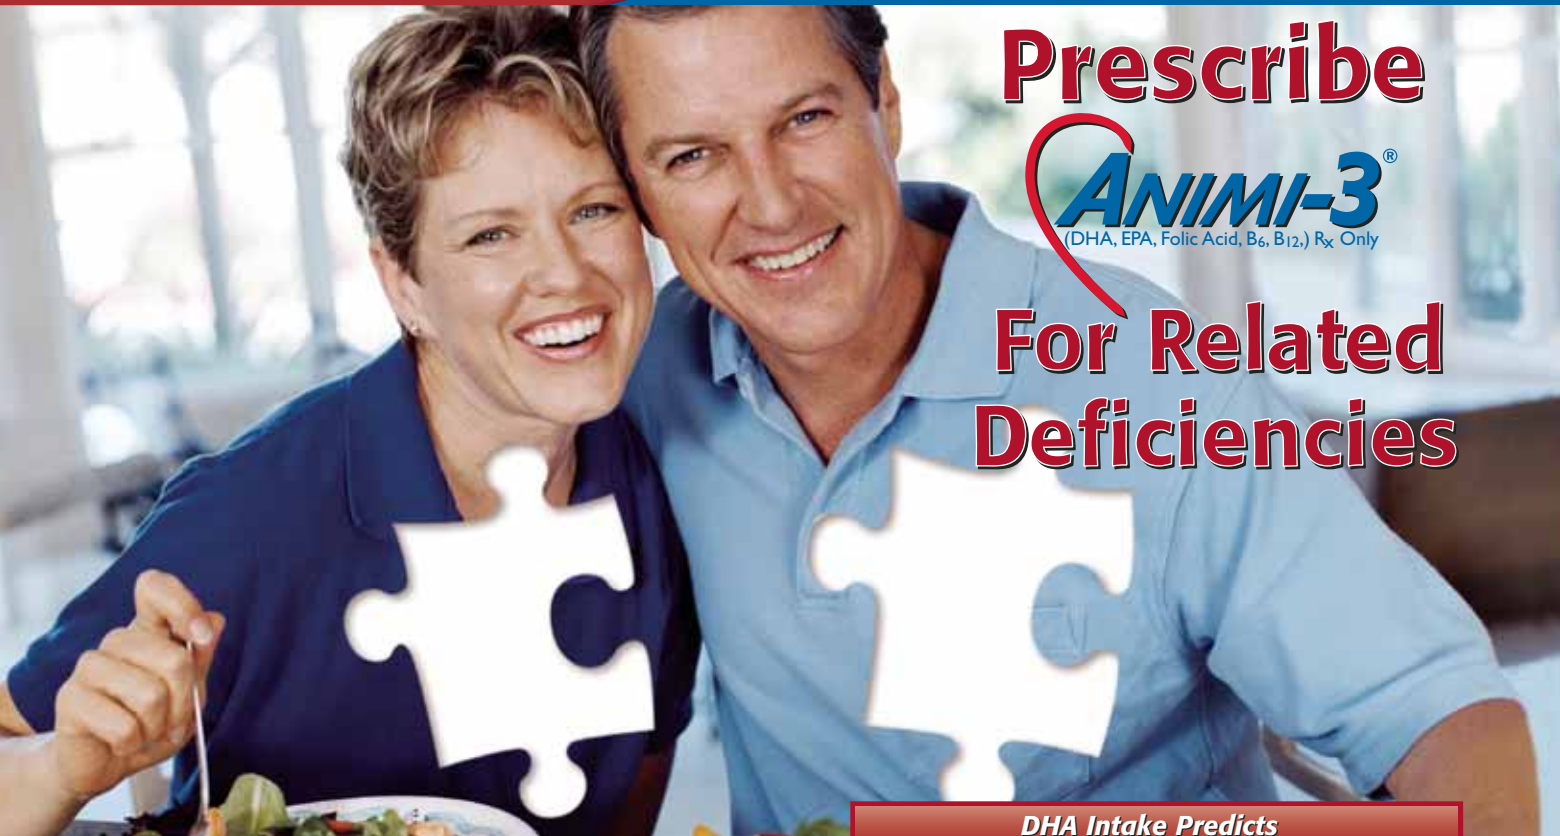

Prescribe

**ANIMI-3**<sup>®</sup>  
(DHA, EPA, Folic Acid, B<sub>6</sub>, B<sub>12</sub>) Rx Only

For Related  
Deficiencies

## Peer Reviewed Journals:

"...reduced membrane DHA emerged as a significant predictor of depression..."

Edwards, R., et al. *J Affect Disord* 1998;48:149-155.

| Depleted Levels:    |         |            |
|---------------------|---------|------------|
|                     | Omega-3 | B-Vitamins |
| <b>Depression</b>   | ✓       | ✓          |
| Arthritis           | ✓       | ✓          |
| Cardiovascular      | ✓       | ✓          |
| Diabetes            | ✓       | ✓          |
| Pregnancy           | ✓       | ✓          |
| Alcohol Consumption | ✓       | ✓          |

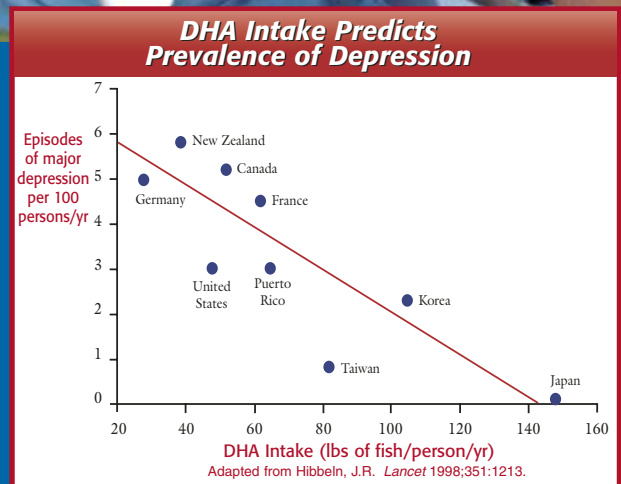

"There is good evidence that psychiatric illness is associated with depletion of [Omega-3] and, crucially, that supplementation can result in clinical amelioration."

Hallahan, B., & Garland, M.R. *British J Psych* 2005;186:275-277.

**Postpartum**—"...lower DHA content in mothers' milk...[was] associated with higher rates of postpartum depression."

Hibbeln, J.R. *J Affect Disord* 2002;69:15-29.

"Trials have shown that folate supplementation hastens recovery from depressive episodes and enhances the effect of antidepressants."

Morris, M.S., et al. *Psychother and Psychosom* 2003;72(2):80-7.

[www.animi-3.com](http://www.animi-3.com)

For Samples Call: 1-800-485-9828

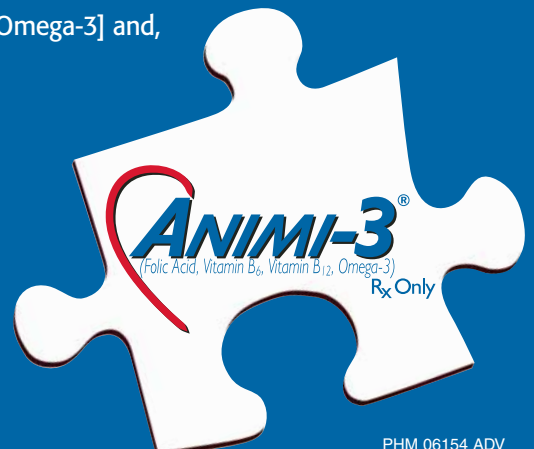

## Animi-3<sup>®</sup>

Each Capsule contains:

|                              |         |
|------------------------------|---------|
| Folic Acid                   | 1 mg    |
| Vitamin B <sub>6</sub>       | 12.5 mg |
| Vitamin B <sub>12</sub>      | 500 mcg |
| Omega-3 Acids                | 500 mg  |
| -Docosahexaenoic Acid (DHA)  | 350 mg  |
| -Eicosapentaenoic Acid (EPA) | 35 mg   |

Patent Pending

### Rx Only

#### Description

Animi-3<sup>®</sup> Capsules are intended for oral administration.

Each Capsule Contains: 1 mg Folic Acid USP, 12.5 mg Vitamin B<sub>6</sub> (Pyridoxine Hydrochloride, USP), 500 mcg Vitamin B<sub>12</sub> (Cyanocobalamin, USP) and Pharmaceutical Grade Omega-3 Fish Oil providing 500 mg Omega-3 Acids; including 350 mg Docosahexaenoic Acid (DHA) and 35 mg Eicosapentaenoic Acid (EPA). Also Contains: Yellow Beeswax NF, Sunflower Oil FCC, Bleached Lecithin NF, Ascorbic Acid USP, Mixed Tocopherols NF, Ascorbyl Palmitate NF and a soft shell capsule (which contains: Gelatin USP, Glycerin NF, Titanium Dioxide USP, FD&C Red 40 and USP Purified Water).

#### Indication

Animi-3<sup>®</sup> Capsules are indicated for improving nutritional status before, during and after pregnancy and in conditions requiring Essential Fatty Acid, Vitamin B<sub>12</sub>, B<sub>6</sub> and Folic Acid supplementation.

#### Contraindications

This product is contraindicated in patients with a known hypersensitivity to any of the ingredients.

#### Precautions

Folic Acid in doses above 0.1 mg daily may obscure pernicious anemia in that hematological remission can occur while neurological manifestations remain progressive.

#### Pediatric Use

Safety and effectiveness in pediatric patients have not been established.

#### Adverse Reactions

Allergic sensitization has been reported following oral, enteral and parenteral administration of folic acid.

#### Dosage and Administration

Adults — One capsule daily or one capsule twice daily, or as directed by a physician.

#### How Supplied

Animi-3<sup>®</sup> supplied as red opaque oblong Capsules. Each Capsule is imprinted with "PBM 540" in black opacode.

Animi-3<sup>®</sup> Capsules are available in bottles of 60 capsules (NDC 66213-540-60).

#### Keep out of reach of children.

Dispense in a well-closed, tight light-resistant container as defined in the USP using a child-resistant closure.

**Storage Conditions:** Store at 20-25°C (68-77°F). See USP Controlled Room Temperature. Protect from light and moisture.

PBM Pharmaceuticals, Inc.  
Gordonsville, VA 22942

Rev. 0705

© 2004

All Rights Reserved.

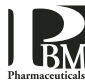

PBM Pharmaceuticals  
800-485-9828

## NEW FROM JOHNS HOPKINS

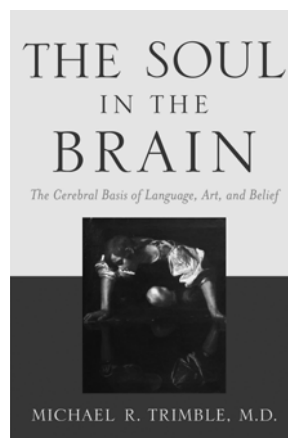

### The Soul in the Brain

The Cerebral Basis of Language, Art, and Belief  
Michael R. Trimble, M.D.

"Everyone interested in the human mind—and who is not?—will find riches here for contemplation."

—Paul McHugh, The Johns Hopkins School of Medicine

"Trimble incorporates his long experience with patients who have brain disorders, his thoughtful approach to neurological diseases, and his philosophical depth to take the reader on an exciting adventure examining the cerebral basis for the cultural beliefs we hold most dear."

—Jeffrey L. Cummings, University of California, Los Angeles

\$35.00 hardcover

### The Mind of the Mathematician

Michael Fitzgerald and Ioan James

Internationally famous mathematician Ioan James and accomplished psychiatrist Michael Fitzgerald explore the behavior and personality traits that tend to fit the profile of a mathematician.

\$30.00 hardcover

### Bipolar Disorder in Later Life

edited by Martha Sajatovic, M.D., and Frederic C. Blow, Ph.D.

"A valuable reference for psychiatrists and other mental health professionals who have older individuals under their care."

—Francis Mark Mondimore, M.D., author of *Bipolar Disorder: A Guide for Patients and Families*

\$50.00 hardcover

### Working with Families of Psychiatric Inpatients

A Guide for Clinicians  
Alison M. Heru, M.D., and Laura M. Drury, M.S.W., L.I.C.S.W.

Keyed to the requirements articulated by the American College of Graduate Medical Education, this handbook is a tool no psychiatric resident can do without. It offers a step-by-step guide to developing the skills needed to work successfully with patients' families.

\$20.00 paperback

### The Concepts of Psychiatry

A Pluralistic Approach to the Mind and Mental Illness  
S. Nassir Ghaemi, M.D., M.P.H.

foreword by Paul R. McHugh, M.D.

"Ghaemi raises dozens of thought-provoking questions in the midst of his tour through the concepts of psychiatry."

—*Journal of Nervous and Mental Disease*

\$25.00 paperback

The Johns Hopkins University Press  
1-800-537-5487 • www.press.jhu.edu

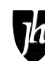

## MEASURE<sup>me</sup>

Modeling Effective Antipsychotic Therapeutic Success by Utilizing Real Evidence

### EVIDENCE BASED BIPOLAR EDUCATION Live and Enduring CME Opportunities

Bipolar experts coming to your area!

**CME Roundtable Dinner Programs**—Evidence-Based Clinical Strategy:  
The Patient with Bipolar Disorder

**Poster Sessions**—Catch up on what you should be reading related to bipolar disorder

**Live Webinars**—Participate in an online interactive CME lecture

Learn more about the various topics, locations, dates and times at:

[www.MEASUREcme.org](http://www.MEASUREcme.org)  
or call us at 1-866-856-1998

### CONTENT DEVELOPED BY EDUCATIONAL REVIEW BOARD MEMBERS

Henry A. Nasrallah, MD  
Board Co-Chair

Peter F. Buckley, MD  
Board Co-Chair

Michael H. Allen, MD

Claudia F. Baldassano, MD

Joseph R. Calabrese, MD  
Andrew J. Cutler, MD

Melissa P. DelBello, MD

Joseph F. Goldberg, MD

Paul E. Keck, Jr, MD

Robert M. Post, MD  
Gary S. Sachs, MD

S. Charles Schulz, MD

Alan C. Swann, MD

Richard M. Trosch, MD

Sponsored by  
The France Foundation  
Continuing Medical Education Center

Sponsored by an  
educational grant from  
AstraZeneca

The effect of  
Agitation...

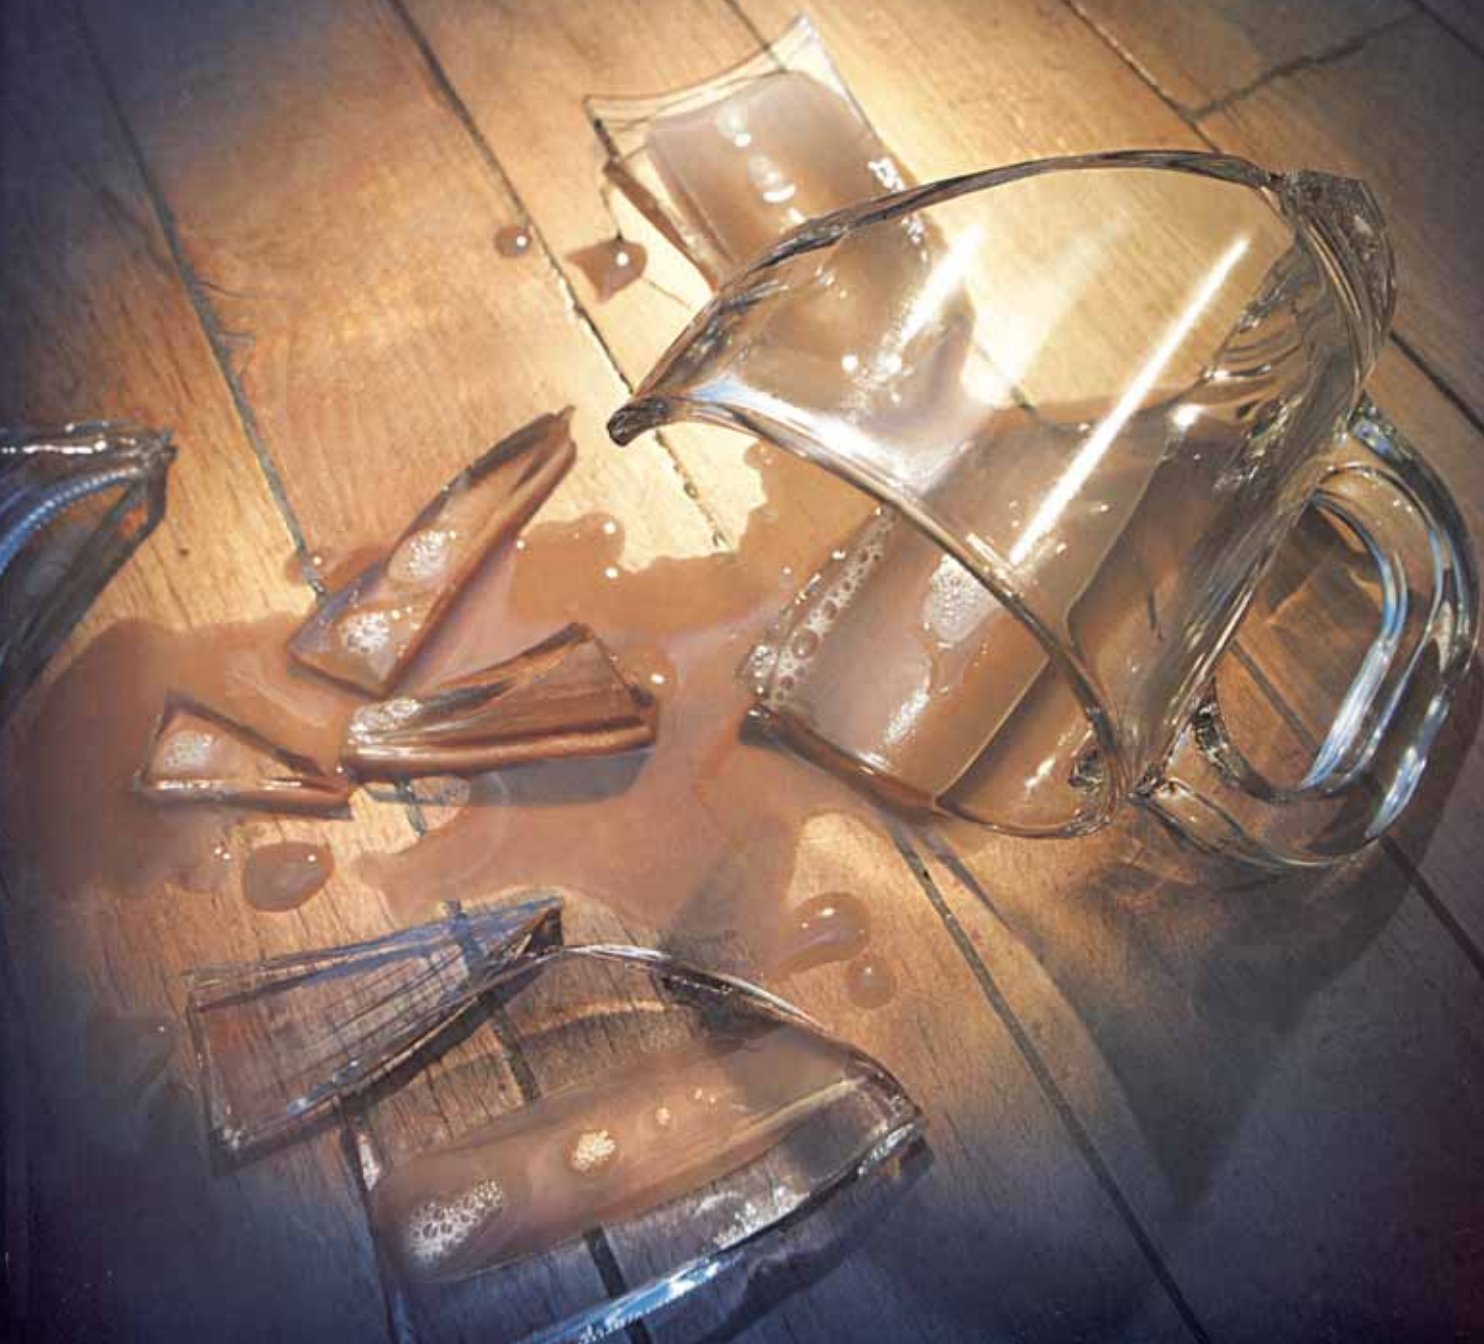

A man and a woman are seated at a dark wooden table, engaged in conversation. The man, on the right, is wearing a dark sweater and looking towards the woman. The woman, on the left, has long dark hair and is wearing a blue top. On the table are several glasses of coffee and a glass of milk. In the background, a large window looks out onto a bright, sunny landscape with green hills, trees, and a blue sky. A large, stylized blue letter 'A' is superimposed on the landscape, with a blue path leading towards it.

# The effect of a start toward long-term symptom control

Physicians who elect to use ABILIFY for extended periods should periodically re-evaluate the long-term usefulness of the drug for the individual patient.

In schizophrenia or bipolar mania

# ABILIFY® (aripiprazole) Injection Rapidly Controls Agitation<sup>1</sup>

Significant reduction in symptoms of agitation in schizophrenia  
as measured by PANSS™-EC score\*

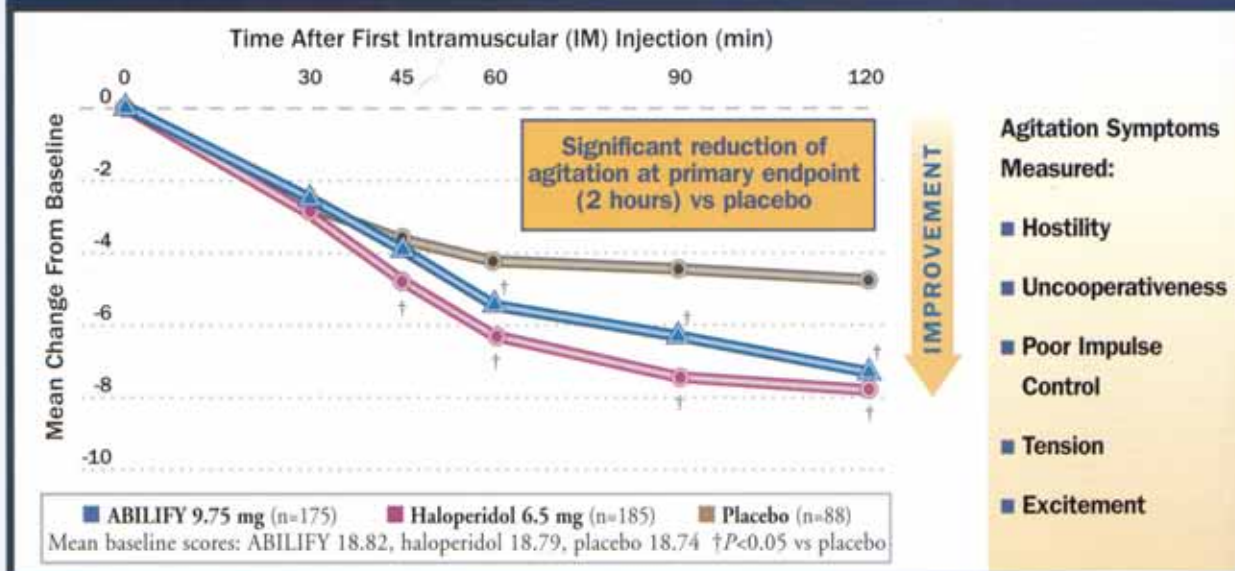

Adapted from Andrezina et al. *Psychopharmacology (Berl)*. 2006.

\*Last observation carried forward.

See study description on next page.

PANSS™-EC=Positive and Negative Syndrome Scale Excited Component.

PANSS™ is a trademark of Multi-Health Systems, Inc.

ABILIFY Injection is indicated for the treatment of agitation associated with schizophrenia or bipolar mania

ABILIFY is also indicated for the treatment of schizophrenia including maintaining stability in patients who had been symptomatically stable on other antipsychotic medications for periods of 3 months or longer and observed for relapse during a period of up to 26 weeks.

Elderly patients with dementia-related psychosis treated with atypical antipsychotic drugs are at an increased risk (1.6 to 1.7 times) of death compared to placebo (4.5% vs 2.6%, respectively). ABILIFY is not approved for the treatment of patients with dementia-related psychosis.

Please see IMPORTANT SAFETY INFORMATION,  
including **Boxed WARNING**, on next page.

  
ABILIFY®  
(aripiprazole)  
INJECTION 9.75 mg/1.3 mL

HELP ILLUMINATE THE PERSON WITHIN



## IMPORTANT SAFETY INFORMATION for ABILIFY® (aripiprazole)

Elderly patients with dementia-related psychosis treated with atypical antipsychotic drugs are at an increased risk (1.6 to 1.7 times) of death compared to placebo (4.5% vs 2.6%, respectively). ABILIFY is not approved for the treatment of patients with dementia-related psychosis (see Boxed WARNING).

- **Neuroleptic malignant syndrome (NMS)**—As with all antipsychotic medications, a rare and potentially fatal condition known as NMS has been reported with ABILIFY. NMS can cause hyperpyrexia, muscle rigidity, diaphoresis, tachycardia, irregular pulse or blood pressure, cardiac dysrhythmia, and altered mental status. If signs and symptoms appear, immediate discontinuation is recommended.
- **Tardive dyskinesia (TD)**—The risk of developing TD and the potential for it to become irreversible may increase as the duration of treatment and the total cumulative dose increase. Prescribing should be consistent with the need to minimize TD. If signs and symptoms appear, discontinuation should be considered since TD may remit, partially or completely.
- **Cerebrovascular adverse events** (eg, stroke, transient ischemic attack), including fatalities, have been reported at an increased incidence in clinical trials of elderly patients with dementia-related psychosis treated with ABILIFY.

- **Hyperglycemia and diabetes mellitus**—Hyperglycemia, in some cases associated with ketoacidosis, coma, or death, has been reported in patients treated with atypical antipsychotics including ABILIFY. Patients with diabetes should be monitored for worsening of glucose control; those with risk factors for diabetes should undergo baseline and periodic fasting blood glucose testing. Patients who develop symptoms of hyperglycemia should also undergo fasting blood glucose testing. There have been few reports of hyperglycemia with ABILIFY.

### Treatment-emergent adverse events reported with: ABILIFY Oral

In short-term trials of patients with schizophrenia (up to 6 weeks) or bipolar disorder (up to 3 weeks), the following were reported at an incidence  $\geq 10\%$  and greater than placebo, respectively: headache (30% vs 25%), anxiety (20% vs 17%), insomnia (19% vs 14%), nausea (16% vs 12%), vomiting (12% vs 6%), dizziness (11% vs 8%), constipation (11% vs 7%), dyspepsia (10% vs 8%), and akathisia (10% vs 4%).

### ABILIFY Injection

In short-term (24 hour) trials, the following were reported at an incidence  $\geq 5\%$  and greater than placebo, respectively: headache (12% vs 7%), nausea (9% vs 3%), dizziness (8% vs 5%), and somnolence (7% vs 4%).

## ABILIFY® (aripiprazole) offers your patients:

- Rapid control of agitation\*<sup>1</sup>
- Early and sustained symptom control
- Low potential of unwanted sedation
- Favorable weight and lipid profile
  - In a 52-week schizophrenia trial, the percentage of patients with  $\geq 7\%$  increase in baseline body weight was 30% for those with BMI  $< 23$ , 19% for those with BMI 23 to 27, and 8% for those with BMI  $> 27$ .

\*With ABILIFY Injection at primary endpoint (2 hours).

Physicians who elect to use ABILIFY for extended periods should periodically re-evaluate the long-term usefulness of the drug for the individual patient.

#### Study Description:

Double-blind, placebo-controlled, randomized, multicenter study conducted with 448 patients. If needed, concomitant benzodiazepine (lorazepam [4 mg/day] or equivalent) could be administered at least 60 minutes after the second injection. After completing the 24-hour IM phase, patients received blinded oral tablet study medication corresponding to their initial treatment arm for 4 days. Patients randomized to aripiprazole or placebo during the 24-hour IM phase received 15-mg aripiprazole oral tablets (with the option of decreasing to 10-mg aripiprazole based on clinical judgment).

#### References:

1. Andreason R, Josiassen RC, Marcus RN, et al. Intramuscular aripiprazole for the treatment of acute schizophrenia or schizoaffective disorder: a double-blind, placebo-controlled comparison with intramuscular haloperidol. *Psychopharmacology (Berl)*. 2006;188:281-292.

Please see accompanying Brief Summary of FULL PRESCRIBING INFORMATION, including Boxed WARNING, for ABILIFY on following pages.

 Bristol-Myers Squibb  Otsuka America Pharmaceutical, Inc.

©2007 Otsuka America Pharmaceutical, Inc., Rockville, MD

570US07AB00102 February 2007 AP444K70/02-07 Printed in USA  Printed on recycled paper.





# New Orleans

OCTOBER 11-14, 2007 ✦ NEW ORLEANS MARRIOTT

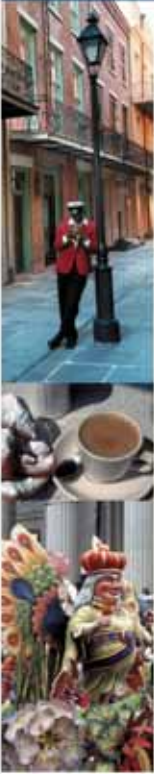

Save the date now to attend the American Psychiatric Association's 59th Institute on Psychiatric Services, APA's leading educational conference on clinical issues and community mental health to meet the service needs of people with severe mental illness. Check out our website at [www.psych.org/IPS2007](http://www.psych.org/IPS2007).

This four-day event will feature more than 100 exhibits that complement the educational program, popular networking events, and over 200 expertly-led educational sessions on topics including: Violence, Trauma, and Victimization; Social and Community Psychiatry; Psychopharmacology; Resident and Medical Student Concerns; Disorders; Cross-Cultural and Minority Issues; Psychiatric Administration and Services; Treatment Techniques and Outcome Studies; Cognitive Disorders; Health Service Research; Mood Disorders; Schizophrenia and Other Psychotic Disorders; and much more...

#### Preliminary Program

The Preliminary Program, which includes registration, housing, and travel information will be available in May at [www.psych.org/IPS2007](http://www.psych.org/IPS2007) or call 1-888-35-PSYCH and request a copy. Online registration will begin on June 1.

For more information, please contact:

American Psychiatric Association  
1000 Wilson Blvd., Suite 1825  
Arlington, VA 22209-3901  
Phone: 1-888-35-PSYCH or  
(703) 907-7300  
Fax: (703) 907-1090  
E-mail: [apa@psych.org](mailto:apa@psych.org)  
Web: [www.psych.org/IPS2007](http://www.psych.org/IPS2007)

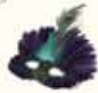

## Osler Institute 119<sup>th</sup> to 125<sup>th</sup> Psychiatry Review Courses

approved for AMA/PRA category 1 credit

### for Written Exams

June 4-8 – Indianapolis

September 5-9 – Milwaukee

### for Oral Boards

Optional didactic day & 3-day mock orals

June 4 & 5-7 – Indianapolis

July 6 & 7-9 – Chicago

September 5 & 6-8 – Milwaukee

January 14 & 15-17 – Portland, OR

### for Child and Adolescent

November 13-15, 2007 – Kansas City

*New – Best of Psych Audio*

**Call Today: (800) 356-7537**

**[www.osler.org/y75a](http://www.osler.org/y75a)**

## CALL FOR POSTERS

### AMERICAN PSYCHIATRIC ASSOCIATION

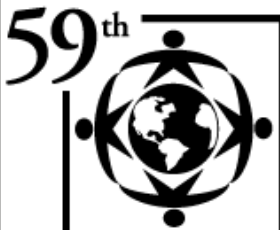

### 59th Institute on Psychiatric Services

October 11-14, 2007  
New Orleans, LA

Institute on  
Psychiatric  
Services

APA's Leading Educational  
Conference on Public and  
Community Psychiatry

Submit your Poster online at [www.psych.org/IPS2007](http://www.psych.org/IPS2007).  
For more information call (703) 907-7377.  
The Poster submission deadline is June 4, 2007.

## Join APA at The Annual Meeting and Qualify for a Rebate

### How Do I Qualify?

You may qualify if you:

1. Are a psychiatrist residing in the U.S. or Canada and,
2. Have paid the full-time registration fee for the Annual Meeting (\$805 advance, \$680 on-site).

### How Do I Apply?

1. Stop by one of the Membership booths either in the Registration area (near the Registrar) or in the APA Member Center (Exhibit Hall B) to fill out an APA Membership Application. The Application must be submitted on-site during the meeting at one of these locations.
2. Additional documentation (proof of ACGME- ADA, or RCPSC)-approved psychiatry residency training and a current, valid medical license) must be received by APA no later than June 30, 2007.

### How Does The Rebate Work?

1. Your local psychiatric district branch must approve the application no later than September 30, 2007.
2. The difference between the member and non-member rate will be applied toward your pre-rated 2007 national and local dues. The remaining balance of the rebate amount will be sent directly to you or if you choose, we can apply the remaining balance to your 2008 dues.\* It's up to you!

### Why Should I Join?

Please stop by one of the Membership booths to learn more about the many benefits and privileges of APA membership.

\*Outstanding dues from previous years may be deducted in some cases.

**SAN DIEGO**

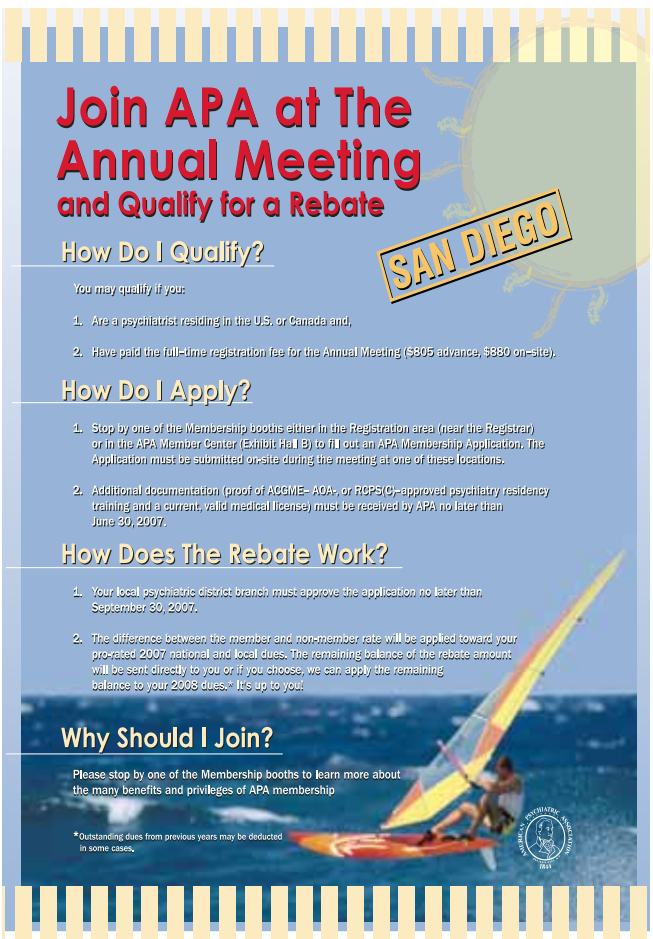

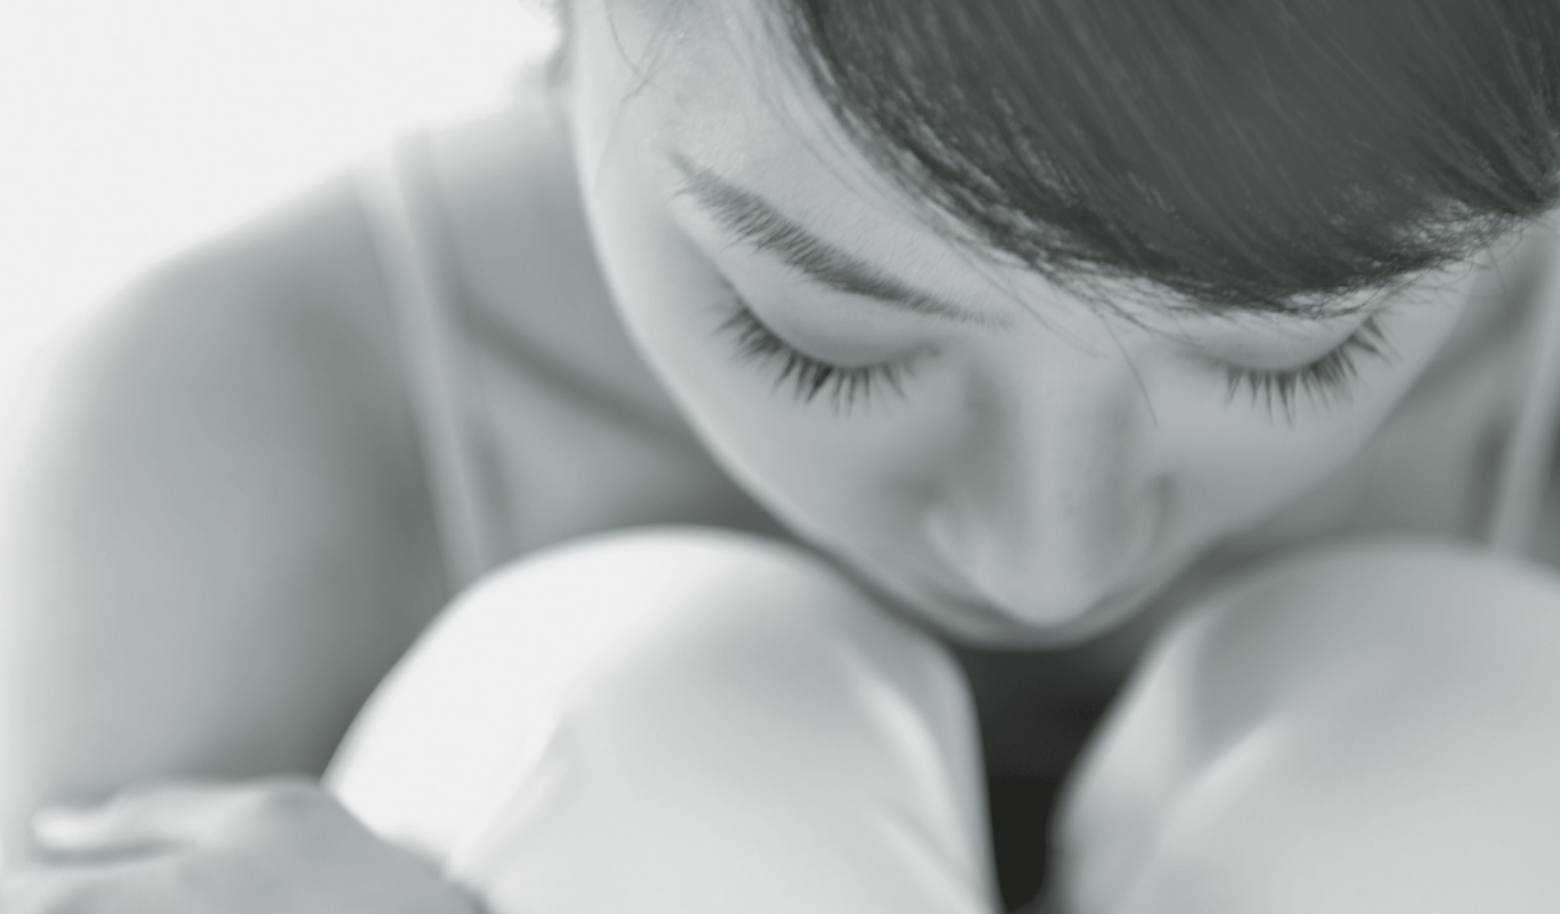

## Our best minds are focused on new treatments in psychiatry.

Knowledge transforms, illuminates, and unlocks the door to the science of mental illness. Over the past 30 years, UPMC's Western Psychiatric Institute and Clinic (WPIC) has set the standard for innovative clinical care including pioneering short- and long-term treatment approaches. We have incorporated both pharmacologic and psychotherapeutic regimens that are standards of care in behavioral health today. As the number one recipient of federal psychiatric research funding and with a history of clinical advances, our psychiatrists' findings have informed their colleagues' practices across the country. WPIC clinicians and researchers have shed light on mental illness across the lifespan and have created new tools for managing pervasive developmental disorders, addictions, mood and anxiety disorders, geriatric psychiatry, and eating disorders. Our specialized clinical programs tackle the most complex cases, with teams who specialize in psychiatry, psychopharmacology, clinical psychology, and neurology assessing and crafting complete, individualized procedure plans. WPIC psychiatrists provide treatment based on current scientific advances so those with mental illness can live healthier and more productive lives.

# UPMC

Affiliated with the **University of Pittsburgh School of Medicine**, UPMC is ranked among the nation's best hospitals by *U.S. News & World Report*.

[www.upmc.com](http://www.upmc.com) | 1-800-533-UPMC

# KNOW THE FACTS

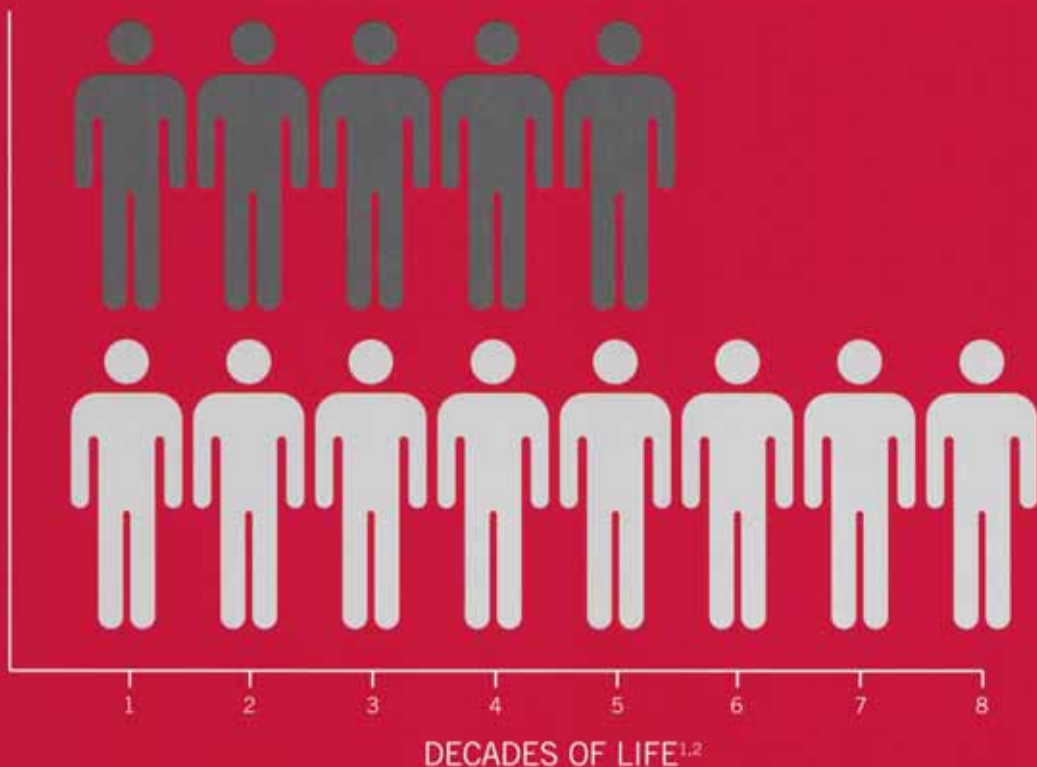

**People with severe mental illness die up to 3 decades earlier, on average, than the general population.<sup>1,2</sup>**

Be aware.  
Screen and monitor your patients.  
Make a difference.

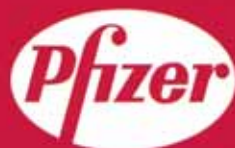

# KNOW THE FACTS

Heart disease is a leading cause of death in patients with severe mental illness.<sup>1,2</sup>

Major risk factors include<sup>3</sup>

- Weight gain
- Diabetes
- High blood pressure
- High cholesterol
- Smoking

Be aware.

Screen and monitor your patients.  
Make a difference.

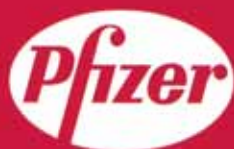

**References:** 1. Colton CW, Manderscheid RW. Congruencies in increased mortality rates, years of potential life lost, and causes of death among public mental health clients in eight states. *Prev Chronic Dis* [serial online]. 2006 April;3(2). Available at: [http://www.cdc.gov/pcd/issues/2006/apr/05\\_0180.htm](http://www.cdc.gov/pcd/issues/2006/apr/05_0180.htm). Accessed December 7, 2006. 2. Miller BJ, Paschall CB III, Svendsen DP. Mortality and medical comorbidity among patients with serious mental illness. *Psychiatr Serv*. 2006;57:1482-1487. 3. *Third Report of the National Cholesterol Education Program (NCEP) Expert Panel on Detection, Evaluation, and Treatment of High Blood Cholesterol in Adults (Adult Treatment Panel III) Executive Summary*. Bethesda, Md: National Institutes of Health, National Heart, Lung, and Blood Institute; 2001. NIH publication 01-3670.



# Still depressed?

- Anxiety, insomnia,  
low energy
- Currently on an SSRI
- Still suffering

It may be time  
to make a change



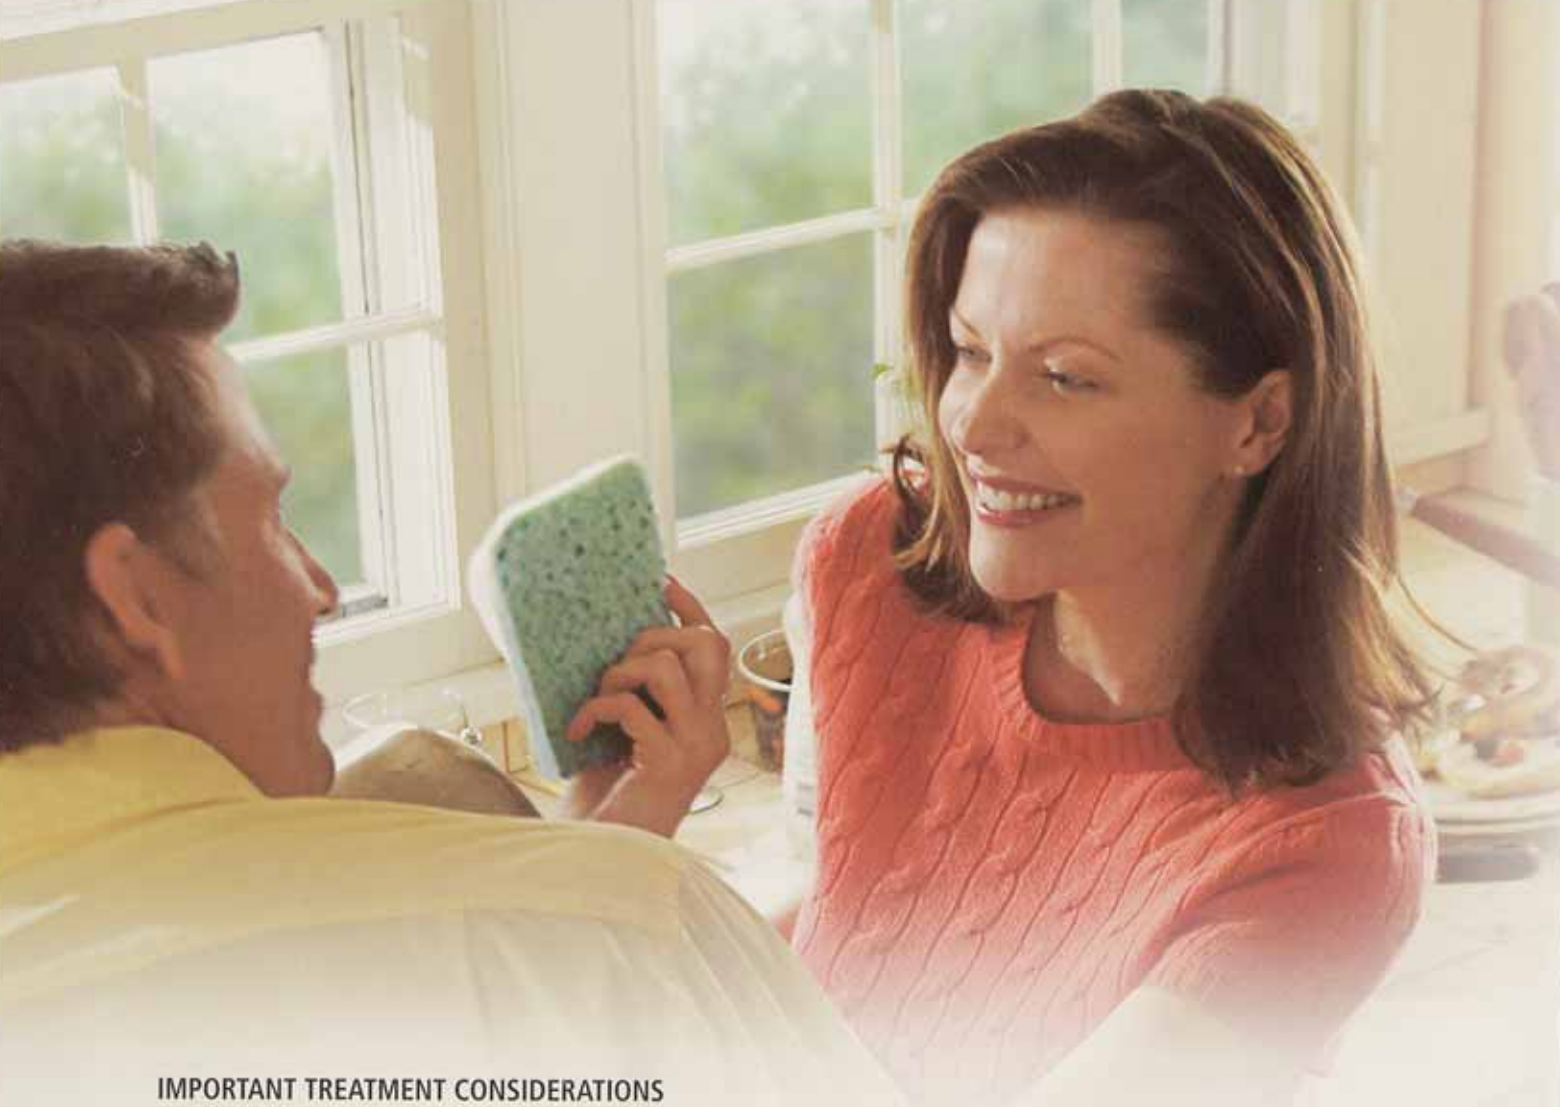

## IMPORTANT TREATMENT CONSIDERATIONS

### Suicidality in Children and Adolescents

Antidepressants increased the risk of suicidal thinking and behavior (suicidality) in short-term studies in children and adolescents with Major Depressive Disorder (MDD) and other psychiatric disorders. Anyone considering the use of EFFEXOR XR or any other antidepressant in a child or adolescent must balance this risk with the clinical need. Patients who are started on therapy should be observed closely for clinical worsening, suicidality, or unusual changes in behavior. Families and caregivers should be advised of the need for close observation and communication with the prescriber. EFFEXOR XR is not approved for use in pediatric patients. (See Warnings and Precautions: Pediatric Use.)

Pooled analyses of short-term (4 to 16 weeks) placebo-controlled trials of 9 antidepressant drugs (SSRIs and others) in children and adolescents with Major Depressive Disorder (MDD), obsessive-compulsive disorder (OCD), or other psychiatric disorders (a total of 24 trials involving over 4,400 patients) have revealed a greater risk of adverse events representing suicidal thinking or behavior (suicidality) during the first few months of treatment in those receiving antidepressants. The average risk of such events in patients receiving antidepressants was 4%, twice the placebo risk of 2%. No suicides occurred in these trials.

- EFFEXOR XR is contraindicated in patients taking monoamine oxidase inhibitors (MAOIs). EFFEXOR XR should not be used in combination with an MAOI or within at least 14 days of discontinuing treatment with an MAOI; at least

7 days should be allowed after stopping EFFEXOR XR before starting an MAOI.

# Break *the* Cycle

## with EFFEXOR XR

- ✓ In an open-label study of patients who failed previous antidepressant treatment, nearly **60%** achieved remission when changed to EFFEXOR XR<sup>1</sup>
- ✓ In the **PREVENT**<sup>™</sup> study, the probability of preventing a new episode of depression was **92%** with EFFEXOR XR in maintenance year 2 vs. 55% with placebo<sup>2\*</sup>
- ✓ More than **12** years of clinical experience and over **20** million patients treated with EFFEXOR/EFFEXOR XR<sup>3†</sup>

- Adult and pediatric patients with MDD can experience worsening of their depression and/or the emergence of suicidal ideation and behavior, whether or not they are taking antidepressants. **Patients treated with antidepressants should be observed closely for clinical worsening and suicidality, especially at the beginning of drug therapy, or at the time of increases or decreases in dose.** Anxiety, agitation, panic attacks, insomnia, irritability, hostility, aggressiveness, impulsivity, akathisia, hypomania, and mania have been reported and may represent precursors to emerging suicidality. Stopping or modifying therapy should be considered especially when symptoms are severe, abrupt in onset, or not part of presenting symptoms.
- The development of potentially life-threatening serotonin syndrome may occur when EFFEXOR XR is coadministered with other drugs that may affect the serotonergic neurotransmitter systems. Concomitant use of EFFEXOR XR with MAOIs is contraindicated. If concomitant use of EFFEXOR XR with an SSRI, SNRI, or a triptan is clinically warranted, careful observation of the patient is advised. Concomitant use of EFFEXOR XR with tryptophan supplements is not recommended.
- Treatment with venlafaxine is associated with sustained increases in blood pressure (BP) in some patients. Postmarketing cases of elevated BP requiring immediate treatment have been reported. Pre-existing hypertension should be controlled. Regular BP monitoring is recommended.
- Mydriasis has been reported in association with venlafaxine; therefore, patients with raised intraocular pressure or those at risk of acute narrow-angle glaucoma (angle-closure glaucoma) should be monitored.

- Abrupt discontinuation or dose reduction has been associated with discontinuation symptoms. Patients should be counseled on possible discontinuation symptoms and monitored while discontinuing the drug; the dose should be tapered gradually. See the Precautions section of the Prescribing Information.
- The most common adverse events reported in EFFEXOR XR short-term placebo-controlled MDD, generalized anxiety disorder (GAD), social anxiety disorder (SAD), and/or panic disorder (PD) trials (incidence  $\geq 10\%$  and  $\geq 2x$  that of placebo) were anorexia, asthenia, constipation, dizziness, dry mouth, ejaculation problems, impotence, insomnia, nausea, nervousness, somnolence, and sweating.

\*For study design, please see references or visit [PreventStudy.com](http://PreventStudy.com).

†Based on IMS National Prescription Audit and SDI longitudinal prescription data.

ONCE-DAILY  
VENLAFAXINE HCl  
**EFFEXOR XR**<sup>®</sup> EXTENDED  
RELEASE  
CAPSULES

*The change they deserve.*

Take a closer look at

# Dialogues

Time to Talk™

## Dialogues

is a unique patient support and education program that is designed to help you foster successful therapy

## Dialogues

offers patients access to a call center to speak with a health care provider for patient support and education to reinforce your efforts

## Dialogues

supplies feedback and updates about these patient calls to you, their physician

Encourage your **EFFEXOR XR** patients to enroll in **Dialogues** by calling 866-313-3737 — and you can visit [mddpatientsupport.com](http://mddpatientsupport.com)

ONCE-DAILY

VENLAFAXINE HCl  
**EFFEXOR XR**® EXTENDED  
RELEASE  
CAPSULES

## The change they deserve.

**References:** 1. Baldomero ER, Ubago JG, Cercós CL, et al. Venlafaxine extended release versus conventional antidepressants in the remission of depressive disorders after previous antidepressant failure: ARGOS study. *Depress Anxiety*. 2005;22:68-76. 2. Data on file, Wyeth Pharmaceuticals Inc. A randomized, multicenter, double-blind, placebo-controlled study (N=1,096 adults). This trial included an acute, a continuation, and 2 one-year maintenance phases. At the start of each of the 2 maintenance phases, EFFEXOR XR responders were re-randomized to either EFFEXOR XR or placebo. The primary end point was time to recurrence of depression. 3. Data on file, Wyeth Pharmaceuticals Inc.

Please see brief summary of Prescribing Information on adjacent pages.

Wyeth® © 2007, Wyeth Pharmaceuticals Inc., Philadelphia, PA 19101  
122873-01 January 2007

ONCE-DAILY  
VENLAFAXINE HCl  
**EFFEXOR XR**® EXTENDED  
RELEASE  
CAPSULES

BRIEF SUMMARY: See package insert for full prescribing information.

### Suicidality in Children and Adolescents

Antidepressants increased the risk of suicidal thinking and behavior (suicidality) in short-term studies in children and adolescents with Major Depressive Disorder (MDD) and other psychiatric disorders. Anyone considering the use of EFFEXOR XR or any other antidepressant in a child or adolescent must balance this risk with the clinical need. Patients who are started on therapy should be observed closely for clinical worsening, suicidality, or unusual changes in behavior. Families and caregivers should be advised of the need for close observation and communication with the prescriber. EFFEXOR XR is not approved for use in pediatric patients. (See Warnings and Precautions: Pediatric Use.)

Pooled analyses of short-term (4 to 16 weeks) placebo-controlled trials of 9 antidepressant drugs (SSRIs and others) in children and adolescents with Major Depressive Disorder (MDD), obsessive-compulsive disorder (OCD), or other psychiatric disorders (a total of 24 trials involving over 4,400 patients) have revealed a greater risk of adverse events representing suicidal thinking or behavior (suicidality) during the first few months of treatment in those receiving antidepressants. The average risk of such events in patients receiving antidepressants was 4%, twice the placebo risk of 2%. No suicides occurred in these trials.

**CONTRAINDICATIONS:** Hypersensitivity to venlafaxine hydrochloride or to any excipients in the formulation. Concomitant use in patients taking monoamine oxidase inhibitors (MAOIs). **WARNINGS: Clinical Worsening and Suicide Risk—**Patients with major depressive disorder (MDD), both adult and pediatric, may experience worsening of their depression and/or the emergence of suicidal ideation and behavior (suicidality) or unusual changes in behavior, whether or not they are taking antidepressant medications, and this risk may persist until significant remission occurs. There has been a long-standing concern that antidepressants may have a role in inducing worsening of depression and the emergence of suicidality in certain patients. Antidepressants increased the risk of suicidal thinking and behavior (suicidality) in short-term studies in children and adolescents with MDD and other psychiatric disorders. It is unknown whether the suicidality risk in pediatric patients extends to longer-term use, i.e., beyond several months. It is also unknown whether the suicidality risk extends to adults. **All pediatric patients being treated with antidepressants for any indication should be observed closely for clinical worsening, suicidality, and unusual changes in behavior, especially during the initial few months of a course of drug therapy, or at times of dose changes, either increases or decreases.** Adults with MDD or comorbid depression in the setting of other psychiatric illness being treated with antidepressants should be observed similarly for clinical worsening and suicidality, especially during the initial few months of a course of drug therapy, or at times of dose changes, either increases or decreases. Anxiety, agitation, panic attacks, insomnia, irritability, hostility, aggressiveness, impulsivity, akathisia (psychomotor restlessness), hypomania, and mania have been reported in adult and pediatric patients being treated with antidepressants for MDD and other indications, both psychiatric and nonpsychiatric. Although a causal link between the emergence of such symptoms and either the worsening of depression and/or the emergence of suicidal impulses has not been established, there is concern that such symptoms may represent precursors to emerging suicidality. Consideration should be given to changing the therapeutic regimen, including possibly discontinuing the medication, in patients whose depression is persistently worse, or who are experiencing emergent suicidality or symptoms that might be precursors to worsening depression or suicidality, especially if these symptoms are severe, abrupt in onset, or were not part of the patient's presenting symptoms. If the decision has been made to discontinue treatment, medication should be tapered, as rapidly as is feasible, but with recognition that abrupt discontinuation can be associated with certain symptoms (see **PRECAUTIONS** and **DOSAGE AND ADMINISTRATION**). Families and caregivers of pediatric patients being treated with antidepressants for MDD or other indications, both psychiatric and nonpsychiatric, should be alerted about the need to monitor patients for the emergence of agitation, irritability, unusual changes in behavior, and the other symptoms described above, as well as the emergence of suicidality, and to report such symptoms immediately to health care providers. Such monitoring should include daily observation by families and caregivers. Prescriptions for Effexor XR should be written for the smallest quantity of capsules consistent with good patient management, in order to reduce the risk of overdose. Families and caregivers of adults being treated for depression should be similarly advised. **Screening Patients for Bipolar Disorder:** A major depressive episode may be the initial presentation of bipolar disorder. It is generally believed that treating such an episode with an antidepressant alone may increase the likelihood of precipitation of a mixed/manic episode in patients at risk for bipolar disorder. Whether any of the symptoms described above represent such a conversion is unknown. Prior to initiating antidepressant treatment, patients with depressive symptoms should be screened to determine if they are at risk for bipolar disorder; such screening should include a detailed psychiatric history, including a family history of suicide, bipolar disorder, and depression. Effexor XR is not approved for use in treating bipolar depression. **Potential for Interaction with MAOIs—**Adverse reactions, some serious, have been reported in patients who recently discontinued an MAOI and started on venlafaxine, or who recently discontinued venlafaxine prior to initiation of an MAOI. These reactions included tremor, myoclonus, diaphoresis, nausea, vomiting, flushing, dizziness, hyperthermia with features resembling neuroleptic malignant syndrome, seizures, and death. Effexor XR should not be used in combination with an MAOI, or within at least 14 days of discontinuing treatment with an MAOI. At least 7 days should be allowed after stopping venlafaxine before starting an MAOI. **Serotonin Syndrome—**The development of potentially life-threatening serotonin syndrome may occur with Effexor XR treatment, particularly with (i) concomitant use of serotonergic drugs and (ii) with drugs that impair metabolism of serotonin (see **CONTRAINDICATIONS—MAOIs**). If concomitant treatment of Effexor XR with an SSRI, SNRI, or a 5-hydroxytryptamine receptor agonist (triptan) is clinically warranted, careful observation of the patient is advised, particularly during treatment initiation and dose increases. The concomitant use of Effexor XR with serotonergic precursors (such as tryptophan supplements) is not recommended. **Sustained Hypertension—**Venlafaxine is associated with sustained increases in blood pressure (BP) in some patients. Postmarketing cases of elevated BP requiring immediate treatment have been reported. Pre-existing hypertension should be controlled. Regular monitoring of BP is recommended. For patients experiencing sustained increase in BP, consider either dose reduction or discontinuation. **Mydriasis—**Mydriasis has been reported; monitor patients with raised intraocular pressure or at risk of acute narrow-angle glaucoma (angle-closure glaucoma). **PRECAUTIONS: General—Discontinuation of Treatment with Effexor XR.** Abrupt discontinuation or dose reduction of venlafaxine at various doses is associated with new symptoms, the frequency of which increased with increased dose level and longer duration of treatment. Symptoms include agitation, anorexia, anxiety, confusion, coordination impaired, diarrhea, dizziness, dry mouth, dysphoric mood, emotional lability, fasciculation, fatigue, headaches, hypomania, insomnia, irritability, lethargy, nausea, nervousness, nightmares, seizures, sensory disturbances (e.g., paresthesias such as electric shock sensations), somnolence, sweating, trivulus, tremor, vertigo, and vomiting. Monitor patients when discontinuing treatment. A gradual reduction in the dose rather than abrupt cessation is recommended. If intolerable symptoms occur following a decrease in the dose or upon discontinuation of treatment, consider resuming the previously prescribed dose. Subsequently, continue decreasing the dose at a more gradual rate. **Insomnia and Nervousness:** Treatment-emergent insomnia and nervousness have been reported. In Phase 3 trials, insomnia led to drug discontinuation in 1% of both depressed patients and Panic Disorder (PD) patients and in 3% of both Generalized Anxiety Disorder (GAD) and Social Anxiety Disorder (SAD) patients. Nervousness led to drug discontinuation in 0.9% of depressed patients, in 2% of GAD patients, and in 0% of SAD and PD patients. **Changes in Weight, Adult Patients:** In short-term MDD trials, 7% of Effexor XR patients had  $\geq 5\%$  loss of body weight and 0.1% discontinued for weight loss. In 6-month GAD studies, 3% of Effexor XR patients had  $\geq 7\%$  loss of body weight, and 0.3% discontinued for weight loss in 8-week studies. In 12-week SAD trials, 3% of Effexor XR patients had  $\geq 7\%$  loss of body weight and no patients discontinued for weight loss. In 12-week PD trials, 3% of Effexor XR patients had  $\geq 7\%$  loss of body weight, and no patients discontinued for weight loss. The safety and efficacy of venlafaxine in combination with weight loss agents, including phentermine, have not been established. Coadministration of Effexor XR and weight loss agents is not recommended. Effexor XR is not indicated for weight loss alone or in combination with other products. **Pediatric Patients:** Weight loss was seen in patients aged 6-17 receiving Effexor XR. More Effexor XR patients than placebo patients experienced weight loss of at least 3.5% in both MDD and GAD studies (18% of Effexor XR patients vs. 3.6% of placebo patients;  $P < 0.001$ ) and the SAD study (47% of Effexor XR patients vs. 14% of placebo patients;  $P < 0.001$ ). Weight loss was not limited to patients with treatment-emergent anorexia (decreased appetite). Children and adolescents in a 6-month MDD study had increases in weight less than expected based on data from age- and sex-matched peers. The difference between observed and expected weight gain was larger for children  $< 12$  years old than for adolescents  $\geq 12$  years old. **Changes in Height, Pediatric Patients:** In 8-week GAD studies, Effexor XR patients aged 6-17 grew an average of 0.3 cm ( $n=122$ ), while placebo patients grew an average of 1.0 cm ( $n=132$ );  $P=0.041$ . This difference in height increase was most notable in patients  $< 12$ . In 8-week MDD studies, Effexor XR patients grew an average of 0.8 cm ( $n=146$ ), while placebo patients grew an average of 0.7 cm ( $n=147$ ). During the 16-week, placebo-controlled SAD study, both the Effexor XR ( $n=109$ ) and the placebo ( $n=112$ ) patients grew an average of 1.0 cm. In the 6-month MDD study, children and adolescents had height increases less than expected based on data from age- and sex-matched peers. The difference between observed and expected growth rates was larger for children  $< 12$  years old than for adolescents  $\geq 12$  years old. **Changes in Appetite, Adult Patients:** Treatment-emergent anorexia was more commonly reported for



**COME TO THE BEAUTIFUL  
SHENANDOAH VALLEY (IN VIRGINIA)**

Northwestern Community Services, a community based behavioral health system, has immediate openings for BE/BC psychiatrists. We provide a wide range of Mental Health, Mental Retardation, and Substance Abuse Services in a five county, rural area. You will find excellent clinical support and administrative staff to work with. You will also find an exceptional team of psychiatrists to work with, both in our system and also in the private sector. We are most fortunate to also have an excellent psychiatric nursing staff. We offer a flexible schedule as well as an excellent benefit package including state retirement, independent investments, medical, dental, and a flexible reimbursement plan.

The positions we are recruiting for are newly established and we have psychiatrists who have been with our organization in excess of 25 years, thereby demonstrating the stability of our behavioral health system. The salary for these positions is negotiable.

Even though we are located in the beautiful Shenandoah Valley, we are within an hour's drive of major metropolitan areas.

**NO CALL  
NO EVENINGS  
NO ADMITTING**

Please contact:  
Mr. Millard F. Hall, Jr., Chief Executive Officer  
(540) 636-4250, extension 3256 or bhall@nwcsb.com

**WORKING TOGETHER.  
MAKING A DIFFERENCE.**

Iowa Health Physicians, the state's largest physician group, is searching for a **BE/BC Adult Psychiatrist** to join a highly respected group in Des Moines, IA.

**Practice Highlights**

- Located on the campus of Iowa Lutheran Hospital, the largest private hospital-based mental health facility in the state.
- Inpatient and outpatient responsibilities.
- A growing community, in need of an additional Psychiatrist.
- Teaching opportunities available.
- Call schedule 1:4.

**Organization Description**

- Iowa Health Physicians is a non-profit 250-member physician group.
- We pride ourselves on providing the highest quality patient care with innovative ways of approaching the health care delivery system.
- Highly competitive salary and compensation plan.

For more information please contact: Jessica Meisner at (888) 343-4912. To expedite consideration, please email your CV to meisnejj@ihs.org or fax to (319) 739-2750.

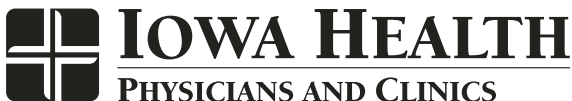

**Partner with a  
Magnet Hospital in  
Wausau, Wisconsin**

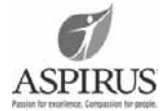

BC/BE Adult Psychiatrist needed for 50/50 Inpatient and Outpatient. Call shared with 6 local psychiatrists including a Medical Director of 11 bed inpatient unit at Aspirus Wausau Hospital. Work with a great team of young vibrant psychiatrists. There is a great potential for program growth and development with a focus on expanded community action. Excellent compensation package with outstanding benefits.

4 seasons of family fun await you. In your backyard you will find fishing, hunting, water sports and much more. For the indoor type we offer shopping, art museum, visual arts center and music conservatory, just to name a few.

Please contact Jamie Sitko today at 800-792-8728 or fax cv to 715-847-2317.

Email: [jamiesi@aspirus.org](mailto:jamiesi@aspirus.org) or visit [www.aspirus.org](http://www.aspirus.org).

**PSYCHIATRIST**

The Louis A. Johnson VA Medical Center, Clarksburg, WV, is seeking an inpatient/outpatient staff psychiatrist. Board certified preferred, board eligible required, specialty of psychiatry. Requirements include MD or DO degree, successful completion of a residency program, and licensed to practice medicine in any state of the United States.

**US CITIZEN PREFERRED.  
MALPRACTICE INSURANCE PROVIDED.  
EXCELLENT BENEFITS PACKAGE.**

Interested candidates may view the vacancy announcement at [www.usajobs.opm.gov](http://www.usajobs.opm.gov).

**Instructor/Assistant/Associate Professor  
Position in Psychiatry  
American University of Beirut  
Faculty of Medicine and  
Medical Center, Beirut, Lebanon**

We are seeking at the Faculty of Medicine and Medical Center of the American University of Beirut a full-time academic Adult Psychiatrist whose responsibilities include inpatient and out-patient care, resident supervision, and teaching medical students. Opportunities for clinical and basic research are available. The psychiatrist is expected to play a leadership role in the research and clinical operation of a new service that includes psychiatrists, clinical psychologists, psychiatric nursing. Candidates should be Board-Certified or eligible in General Psychiatry and have established academic and administrative credentials. Successful candidates will be appointed at the appropriate academic rank and track.

We are moving to a newly refurbished facility. Many opportunities for collaboration with the framework of the Abu-Haydar Neuroscience Institute exist with physician-scientists and clinicians from adult/child neurology, neurosurgery and psychiatry.

Fluency in both English and Arabic is a requirement.

To apply please send a cover letter, CV and names of three referees, no later than June 30, 2007 to:

Rose Mary Boustany, MD, Chairperson  
Abu-Haydar Neuroscience Institute and  
Acting Chairperson  
American University of Beirut  
P.O.Box 11-0236 - Riad El-Solh/Beirut 1107-2020, Lebanon  
E-mail submission is also encouraged at: rb50@aub.edu.lb

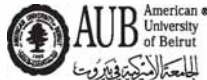

AUB is an affirmative action institution and an equal opportunity employer.

**Salt River Pima-Maricopa Indian Community**

**Psychiatrist**

**\$139,318 - \$208,978/year**  
*Open Until Filled*

The Salt River Pima-Maricopa Indian Community, located in Scottsdale, Arizona, is seeking a physician specialist psychiatrist to provide direct and indirect services for our community. Duties will include direct mental health and psychiatric evaluation and care, consultation and training, system development and associated administrative duties.

The position requires an MD from an accredited medical school and board certification in general psychiatry from the American Board of Psychiatry and Neurology and at least 5 years full-time experience practicing psychiatric medicine. Candidates must also possess current Drug Enforcement Agency (DEA) registration and a license to practice medicine in the State of Arizona. Board certification in child psychiatry and adult psychiatry from the American Board of Psychiatry and Neurology preferred. Experience working in Native American or Alaskan Native communities and experience in building systems of care preferred.

The Salt River Pima-Maricopa Indian Community offers a rich benefits package with too much to mention: Health Insurance, Prescription Drug Coverage, Vision Care, Dental, Paid Life, Employee Assistance Program, 401(k) plan, Accrue 15 Paid Annual and 15 Sick Days your first year, 13 recognized holidays and more!

**Apply Today!**

To be considered for this position, please apply online at [www.srpmicjobs.com](http://www.srpmicjobs.com). Or submit your resume and completed SRPMIC application to: **SRPMIC, HR Dept., 10,005 E. Osborn Road, Scottsdale, AZ 85256**. Please call 480.850.8096 for more details. EOE. Native American Preference Applies.

[www.srpmicjobs.com](http://www.srpmicjobs.com)

**FEDERAL BUREAU OF PRISONS**

Discover a Unique Career

**FMC Devens Career Opportunities** - The Federal Medical Center at Devens, MA., has 2 openings in the Psychiatry Department. A **Chief Psychiatrist** whose responsibilities include providing leadership to staff psychiatrists on professional issues; defining psychiatry programs within agency guidelines, utilizing evaluation standards, clinical practice guidelines, and performance measures and a **Staff Psychiatrist** whose duties include maintaining and developing program mission goals and objectives for psychiatry that are defined by the Bureau of Prisons, providing guidance on maintaining court ordered studies, forensic evaluations and civil commitment.

**Excellent Benefits** - Health and life insurance, sick and annual/vacation leave, plus 10 paid holidays per year, continuing education funds, Federal Law Enforcement Retirement Plan, and a Thrift Savings plan (similar to 401K).

**Career Pathways** - Work as a civil service employee for the Federal Bureau of Prisons, or as a Commissioned Officer in the U.S. Public Health Service Commissioned Corp.

YOU can have a significant role in the health of the nation by delivering quality psychiatric care within a federal health care facility.

For additional information, please contact:

**Federal Medical Center**  
**Attn: Charleston Iwuagwu or Michele Wilson**  
42 Patton Rd  
Devens, MA 01432  
**Phone: 978-796-1502 or 978-796-1153**  
[ciwuagwu@bop.gov](mailto:ciwuagwu@bop.gov) or [mmwilson@bop.gov](mailto:mmwilson@bop.gov)

The Federal Bureau of Prisons is an  
Equal Opportunity Employer

**NAPA, CALIFORNIA**

**Napa State Hospital  
and  
The University of California, Davis**

Napa State Hospital, in the heart of the wine country just north of San Francisco, in conjunction with the UC Davis, Department of Psychiatry, is inviting applications for Staff Psychiatrist positions.

Our hospital has been enlarging its Forensic Program and needs psychiatrists with a desire to serve the chronically and severely mentally ill. We are a large psychiatric teaching hospital with congenial staff, onsite CME, a research program and competitive salary and benefits.

Our collaboration with UC Davis includes consultation, forensic residents on site and joint educational presentations. UC Davis volunteer faculty positions are available to those meeting requirements.

**New salaries announced:  
Maximum will be up to \$242,000 per year  
(meeting qualifications)**

For more information, send a CV to:

**Jeffrey Zwerin, D.O., Medical Director**  
2100 Napa-Vallejo Hwy  
Napa, CA 94558

- call 707-253-5434

- email <[jzwerin@dmhsh.state.ca.us](mailto:jzwerin@dmhsh.state.ca.us)>

We are an equal opportunity employer

## NEW HAMPSHIRE HOSPITAL MEDICAL DIRECTOR

**DARTMOUTH MEDICAL SCHOOL.** The Department of Psychiatry is seeking a senior faculty member to serve as Medical Director of New Hampshire Hospital, in Concord, NH.

New Hampshire Hospital (NHH) provides acute and chronic hospital services for citizens of New Hampshire. The hospital first opened in 1842; its 230 acute care beds are housed in a beautiful 17 year-old facility. Through a longstanding successful collaboration between the State of New Hampshire and the Department of Psychiatry at Dartmouth, the hospital provides outstanding clinical services, is a sought-after teaching and training site, and has partnered with research groups to improve targeted aspects of care and to build new knowledge.

The NHH Medical Director will serve as the chief clinical officer of New Hampshire Hospital. The NHH Medical Director is part of the Senior Leadership of the Department of Psychiatry and will work closely with the Chair to lead the Department and to further extend the established state-academic partnership. The role will include supporting and facilitating excellent clinical care, supporting New Hampshire Hospital's function as an outstanding teaching and training site, and facilitating research activities that serve the mission of both New Hampshire Hospital and the Department.

The ideal candidate will have a passion for public sector care, a patient-centered clinical orientation, excellent clinical leadership skills, sound interpersonal skills, administrative experience, and a strong academic background. The candidate must be a board certified psychiatrist.

Curriculum vitae and three letters of reference should be sent to:

**Alan I. Green, M.D., Raymond Sobel Professor and Chairman  
Department of Psychiatry, Dartmouth-Hitchcock Medical Center  
1 Medical Center Drive, Lebanon, NH 03756**

*Dartmouth College is an Equal Opportunity/Affirmative Action Employer and encourages applications from women and members of minority groups.*

## PSYCHIATRISTS

The Department of Veterans Affairs, Central Texas Veterans Health Care System (CTVHCS), is accepting applications for several positions for board-certified Psychiatrists at Temple and Waco, Texas. CTVHCS is affiliated with the Texas A&M University Health Science Center. Applicants with interest in teaching and research will be given preference. CTVHCS offers competitive salaries and excellent benefits.

Applicants are required to have expertise in treatment of at least one of the following patient populations: the seriously mentally ill, PTSD or provision of mental health in primary care clinics.

In addition to its close proximity to the metropolitan Austin area famous for its live entertainment, Central Texas offers affordable housing, excellent schools, one of the lowest costs of living in the country and year-round recreational opportunities highlighted by the lakes and rivers of the Texas Hill Country. Texas has no state income tax.

Candidates must be US citizens or permanent residents, as well as possess a valid and unrestricted medical license in at least one state. Reasonable accommodation provided to any applicant with disabilities. Applicants are subject to drug testing. EOE

Please Fax or send CV to:

**Mary P. Doerfler, Physician Recruiter  
Central Texas Veterans Health Care System  
1901 Veterans Memorial Drive, Temple, TX 76504  
FAX (254) 743-0007, Voice (254) 743-0049  
E-mail to [Mary.Doerfler@va.gov](mailto:Mary.Doerfler@va.gov)**

## THE MIND INSTITUTE

*Mental Illness and  
Neuroscience Discovery*

The MIND Institute, located in Albuquerque, New Mexico, is part of a national science network committed to expanding the boundaries of neuroscience research, leading to a better understanding of human behavior and discovering new approaches to the diagnosis and treatment of mental illness and other brain disorders.

We are looking for both junior and senior research scientists and clinicians to join our organization with expertise in schizophrenia and psychosis, addiction and antisocial disorders, and both normal learning and learning in neurodevelopmental disorders. Candidates should have experience with neuroscience imaging technologies, clinical mental health experience, and strong organizational skills. M.D. or Ph.D. required.

Our research programs employ a variety of imaging methods including structural MRI, functional MRI, spectroscopy, diffusion tensor imaging, electro- and magneto-encephalography, as well as genetic, neuropsychological and psychiatric assessments. The MIND has recently obtained the first mobile MRI dedicated to performing brain imaging research in inmates, warfighters and other remote populations. Along with developing new technologies to reduce learning time and increase retention, we are also pursuing innovative methods of data-driven analysis, including ICA and Bayesian networks. We collaborate closely with MIND Research Network partners at Sandia and Los Alamos National Laboratories, the University of New Mexico, Harvard/MIT/Massachusetts General Hospital and the University of Minnesota.

For more information about the MIND Institute, as well as a complete description of the opportunities available, please visit our website at:  
[www.themindinstitute.org](http://www.themindinstitute.org)

The MIND Institute is a 501(c)3 independent, non-profit organization and is an equal opportunity employer.

## The doctor is in.

Whether you are a practicing physician or talented applicant, the American Psychiatric Association (APA) Job Bank is your psychiatric job placement resource.

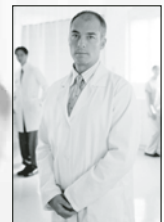

### IN FOCUS

#### Candidates:

Post your résumé online for free.  
Search psychiatric jobs by specialty or location.  
Gain access to employment tools.

#### Employers:

Post psychiatric career opportunities quickly and easily.  
Tap into an online résumé database.  
Find the right candidate for your psychiatric position.

### IN THE KNOW

Access sample cover letters and curriculum vitae, career development articles, salary surveys, interview worksheets and other tools on the APA Job Bank.

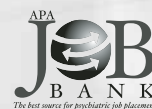

Visit [www.psych.org/jobbank](http://www.psych.org/jobbank) today.

Advertise your psychiatric opportunity in APA's *Psychiatric News* or *Psychiatric Services* classifieds and with the APA Job Bank online to receive a 10 percent discount on both. For more information, call (888) 35-PSYCH ext. 7330 or direct at (703) 907-7330, or email [classads@psych.org](mailto:classads@psych.org).

**Beth Israel**

First Avenue at 16th Street  
New York, NY 10003

*Stability, teamwork and medical excellence that makes a difference on a daily basis. Since 1889, Beth Israel Medical Center, a 1368-bed full service tertiary teaching hospital has been at the forefront of progressive medical advancement serving our local community and influencing healthcare on a national and international level. Our continued growth and success requires the best qualified individuals for an exceptional career opportunity.*

**PSYCHIATRIST – ADDICTION PSYCHIATRY  
DEPARTMENT OF PSYCHIATRY  
AND BEHAVIORAL SCIENCES**

The Department of Psychiatry is seeking an Addiction Psychiatrist for a full-time faculty position in the Division of Addiction Psychiatry. The division includes a nationally recognized 28-bed MICA unit, outpatient clinic and a fellowship program in Addiction Psychiatry. Responsibilities include: teaching and supervision of psychiatry residents, addiction fellows, medical students, and psychology interns; leading a multi-disciplinary team in providing clinical services to patients as well as QA and QI; collaborative and independent research as well as private practice. Candidates should be licensed or eligible for licensure in NYS and board certified in General Psychiatry and Addiction Psychiatry. Candidates must be eligible for appointment to the faculty of Albert Einstein College of Medicine. Salary commensurate with experience.

**Reply to: Michael Serby, MD, Associate Chairman, Department of Psychiatry, Beth Israel Medical Center, 1st Avenue at 16th Street, NY, NY 10003, Fax 212-420-3442. Email: mserby@bethisraelny.org.**

*We are committed to diversity and equal opportunity.*

**NEW YORK STATE OFFICE OF  
MENTAL HEALTH  
ELMIRA PSYCHIATRIC CENTER**

Elmira Psychiatric Center, a JCAHO accredited facility, is seeking BE/BC Psychiatrists. Located in New York's scenic Finger Lake Region, EPC is an intermediate psychiatric hospital offering a full range of inpatient and outpatient services.

EPC offers a comprehensive New York State benefits package including health, dental, prescription, optical, vacation, holidays, retirement, and Section 457 Investment Fund. Lucrative private practice potential and extra service compensation are also available. Salary to commensurate with experience.

**Contact:**

Elmira Psychiatric Center  
100 Washington Street  
Elmira, NY 14901

E-mail: ElmiraPC@gmail.com

Phone: (607) 737-4726; Fax: (607) 737-4722

An AA/EOE Employer

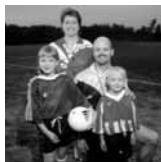

**ONE LIFE. FOUR SEASONS.  
COUNTLESS OPPORTUNITIES.**  
*opportunities.*

In Wisconsin, you will enjoy four-season living, small-town communities and a lucrative medical practice. When you join Ministry Medical Group, our entire team is committed to your success.

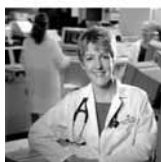

**CURRENT OPPORTUNITIES**

We are currently seeking BC/BE Psychiatrists to join our outpatient clinics. Adult and child/adolescent opportunities are available.

- Opportunities located in Stevens Point and Rhinelander
- Minimal managed care
- Combination of first-year salary guarantee, incentive bonus and benefits package

**“P**hysician-driven leadership, a supportive administration and excellent technology provide a work environment that fosters growth and outstanding patient care.”  
–John Oglesby, MD

  
**MINISTRY MEDICAL GROUP**  
Stevens Point, Wisconsin  
ministryhealth.org

Not a J-1 waiver site

CALL TODAY! 800-420-2622  
Brenda Chambers, Physician Recruiter  
Fax: 715-342-7910  
brenda.chambers@ministryhealth.org

**CHAIRPERSON  
DEPARTMENT OF PSYCHIATRY  
Brigham and Women's/Faulkner Hospitals  
STANLEY COBB PROFESSOR  
OF PSYCHIATRY  
Harvard Medical School**

Harvard Medical School and Brigham and Women's/Faulkner Hospitals are seeking an academic leader to serve as the Stanley Cobb Professor of Psychiatry and the Chairperson of the Department of Psychiatry at Brigham and Women's/Faulkner Hospitals, a founding member of the Partners HealthCare System. This individual will be responsible for the full scope of clinical, research and educational activities of the department as well as collaborative activities with the other departments of this academic medical center, Partners HealthCare System, Harvard Medical School, Faulkner Hospital and other affiliated institutions.

Candidates should have a strong record as a mentor and as a teacher, national recognition for psychiatric research accomplishments, and possess exceptional leadership, managerial, and collaborative skills. Ideally, she/he would be a proven academic medical leader with an international reputation in one of the disciplines of psychiatry, who can lead a complex and successful organization to even higher levels of excellence.

**Martin A. Samuels, MD, Chairman, Department of Neurology  
Brigham and Women's Hospital  
Professor of Neurology, Chair, Search Committee  
c/o Wanda McClain, Brigham and Women's Hospital  
75 Francis Street PB411, Boston, MA 02115  
Email: BWHPsychSearch@partners.org**

**Interested candidates are requested to submit  
a current Curriculum Vitae by email to  
BWHPsychSearch@partners.org  
by May 15, 2007 for consideration.**

Harvard Medical School and Brigham and Women's/Faulkner Hospitals are equal opportunity/affirmative action employers with strong institutional commitments to diversity in their faculty. Women and minority candidates are particularly encouraged to apply.

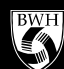

**BRIGHAM AND  
WOMEN'S HOSPITAL**

**HARVARD MEDICAL  
SCHOOL**

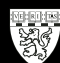



## PSYCHIATRISTS *The VA Needs You*

Shreveport, Louisiana, Alexandria, Louisiana,  
Biloxi, Mississippi, Pensacola, Florida,  
Mt. Vernon, Missouri, Fayetteville, Arkansas

Psychiatrist positions require: BE/BC Psychiatrists, current, full, unrestricted licensure (any state), U.S. citizen. Great Benefits, Excellent Pay, Rewarding Work. See announcements on [www.vacareers.va.gov](http://www.vacareers.va.gov).

**BILOXI/PENSACOLA** Outpatient and Inpatient Psychiatry positions. Expertise in substance abuse, geropsychiatry and PTSD preferred. BE/BC psychiatrist, state license (any state), U.S. citizen or permanent resident. Send applications to Jean Williams, HRMS (05A), 400 Veterans Avenue, Biloxi, MS or contact at [jean.williams@med.va.gov](mailto:jean.williams@med.va.gov) or (228) 523-5633.

**ALEXANDRIA** Strong clinical skills. Prefer experience in Geropsychiatry, Substance Abuse and/or PTSD. CV/ Application to [tammie.arnold@med.va.gov](mailto:tammie.arnold@med.va.gov) or Tammie Arnold, Psychiatry Service (116), P.O. Box 69004, Alexandria, LA 71306-9004. (318) 473-0010 ext 2696.

**SHREVEPORT** Prefer experience in Substance Abuse, PTSD. Contact Tracie Bennett at (318) 221-8411, ext 5118 or [tracie.bennett@va.gov](mailto:tracie.bennett@va.gov). Email or mail your CV to VAMC, HRMS (05) TB, 510 E. Stoner Ave, Shreveport, LA. (318) 221-8411, ext 5118.

**FAYETTEVILLE, MT. VERNON** Contact Laura Berg, HRMS, at [laura.berg2@va.gov](mailto:laura.berg2@va.gov) or (479) 443-4301, ext 5191.

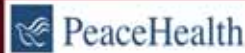

*Dedicated to Exceptional Medicine  
and Compassionate Care*

## SEEKING AN EXCEPTIONAL PSYCHIATRIST

PeaceHealth Medical Group in Eugene, Oregon, is a 120-physician multi-specialty group seeking a BE/BC Psychiatrist to join our inpatient Behavioral Health team. We are associated with Sacred Heart Medical Center, a 432-bed level-two trauma regional medical center. We offer a highly competitive pay system, full malpractice coverage and great benefits.

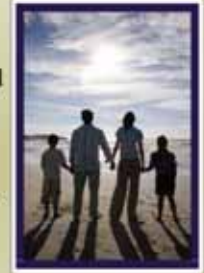

**EUGENE, OREGON** is one of the most desirable cities in the Pacific Northwest in which to live, work and play. The area is extraordinarily rich in recreational areas as well as cultural activities and the arts. Eugene is located in the heart of the Willamette Valley and is within an hours drive of adventures at the beach with amazing cliffs and sand dunes or at the snow peaked mountains with hundreds of different ski runs.

*PeaceHealth is an EEO and Affirmative Action Employer*

Email your CV to Dorothy Reed at [dreed@peacehealth.org](mailto:dreed@peacehealth.org) or Fax to (541) 681-3072.

## Discover Vacationland and Join the Professionals at

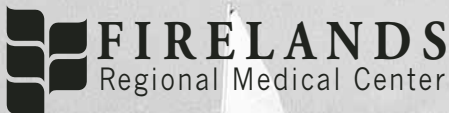

Sandusky, Ohio

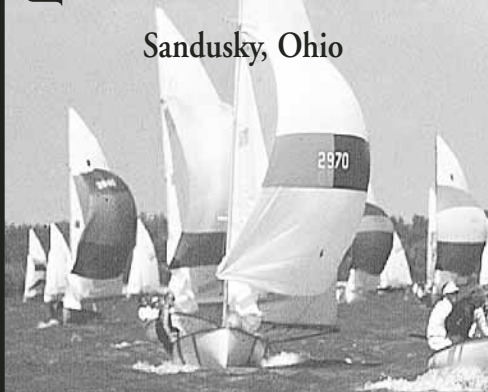

*Building the Future  
of Health Care*

Firelands Regional Medical Center invites you to become a member of one of the most progressive healthcare teams in the Heart of Vacationland.

Firelands is a 440-bed acute care medical center serving a population of over 250,000 in a six county area.

### PSYCHIATRIST WANTED.

*Join an active and successful practice.*

A \$150 million building project is underway to expand the medical center's patient capacity and cancer treatment/care.

Sandusky, located on the southern shore of Lake Erie, is one hour west of Cleveland. The area is famous for its recreational facilities, which include beautiful city and state parks, fishing piers, beaches, Cedar Point Amusement Park and boating facilities. Our North Coast region is also rich in both cultural activities and educational opportunities.

For more information, call Dru Meredith, Physician Recruiter at 419-557-7885, or e-mail resume to [meredid@firelands.com](mailto:meredid@firelands.com), fax 419-557-7235.

# ADULT PSYCHIATRY OPPORTUNITY

## GEISINGER HEALTH SYSTEM

Geisinger Health System's Division of Psychiatry in Danville, PA, is seeking an adult psychiatrist. This position offers an excellent quality of life and an opportunity to work part-time or full-time depending on the needs of the candidate.

### This position offers:

- A flexible schedule – start/end times are negotiable, and the specific psychiatric interests and talents of applicants usually can be integrated into the needs of the practice. Opportunities include inpatient – outpatient – emergency – and consultation-liaison psychiatry.
- A wonderfully collaborative team of psychiatrists/psychologists with experience and expertise in a variety of psychiatric specialties.
- The support of multiple PAs, a nurse specialist and masters-level therapists.
- An excellent call schedule (1 in 7), most call via telephone from home.
- The opportunity to work in a comprehensive academic practice that sees a wide variety of clinical activity from pediatric to geriatric patients and diagnostic types and treatments (including ECT).
- Research opportunities through the Weis Center for Research and Geisinger Center for Health Research (both located on the campus of Geisinger Medical Center). Current research projects include studies on genomic schizophrenia, adolescent depression and improving the delivery of adult depression through primary care.
- An accredited Clinical Psychology Internship and the opportunity to teach pediatric and emergency medicine residents, as well as third year medical students from Temple University and Pennsylvania College of Osteopathic Medicine, with clinical appointments available.
- An established referral base through Geisinger Health System's 40 community medical groups, 3 hospitals, local/community physicians and the broad-base of third party contracts.

In the past two years Geisinger's Department of Psychiatry has added a 10-bed Adolescent Inpatient Unit at Geisinger South Wilkes-Barre, the neuro-psychiatry practice has doubled and added 2 post-doctoral fellows and Pediatric Psychiatry has experienced significant growth. At Geisinger, you'll experience the support, camaraderie and professional challenges of a leading practice while discovering the charms of Pennsylvania living... all while having the time and flexibility to enjoy your new quality of life.

### To discuss this opportunity, contact:

Kathy Kardisco, Recruiter, Geisinger Dept. of Pro. Staffing,  
100 North Academy Avenue, Danville, PA 17822-2428  
Phone: 1-800-845-7112 • Fax: 1-800-622-2515  
e-mail: [kkardisco@geisinger.edu](mailto:kkardisco@geisinger.edu)

*Geisinger is a drug-screening employer; EOE/M/F/D/V.*

# GEISINGER

[WWW.GEISINGER.ORG/DOCJOBS](http://WWW.GEISINGER.ORG/DOCJOBS)

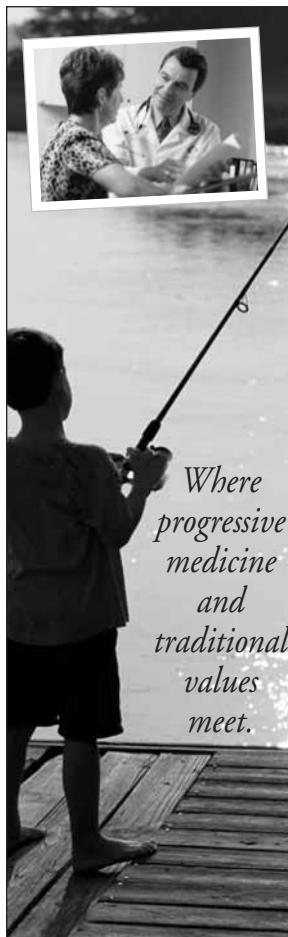

*Where  
progressive  
medicine  
and  
traditional  
values  
meet.*

**Marshfield Clinic** is nationally recognized for providing physicians with the most advanced medical equipment and health information technology today. Surrounded by nature's beauty in Wisconsin, we are located in communities where neighbors know one another.

**We have openings for Adult and Child and Adolescent Psychiatrists for our expanding services.**

Marshfield Clinic is a multi-specialty group practice with over 725 physicians located at 40 centers in Wisconsin. The Clinic's Research Foundation has a history of important medical discoveries in human genetics and support for clinical research.

To learn more about these opportunities and the very competitive compensation package, please contact: Beth Albee, Physician Recruitment, **Marshfield Clinic**, 1000 N. Oak Ave., Marshfield, WI 54449. Phone: 800-782-8581, extension 19775; Fax #: 715-221-9779.

E-mail: [albee.beth@marshfieldclinic.org](mailto:albee.beth@marshfieldclinic.org)  
Website: [www.marshfieldclinic.org/recruit](http://www.marshfieldclinic.org/recruit)

 **MARSHFIELD CLINIC.**

*Where the future of medicine lives*

Marshfield Clinic is an Affirmative Action/Equal Opportunity employer that values diversity. Minorities, females, individuals with disabilities and veterans are encouraged to apply.

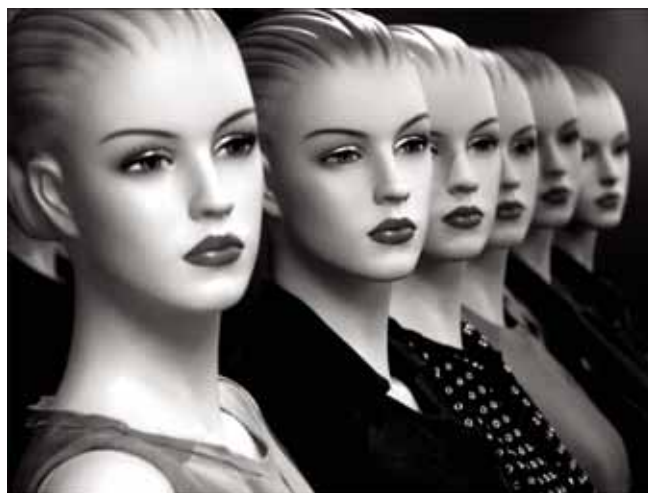

### Are you tired of generic, one-size-fits-all behavioral healthcare?

More and more physicians are turning to Acadia Healthcare for what's important to them: greater personal and professional reward, collegiality, a unique atmosphere and the respect and support of a great physician-led team.

You owe it to yourself to investigate the possibilities with Acadia.

### Acadia Healthcare

Phone: 888.392.2234 • Fax: 770.776.5533

[physicianrecruiting@acadiahealthcare.com](mailto:physicianrecruiting@acadiahealthcare.com)

*Opportunities nationwide. J1 and H1 Visa opportunities in Texas.*

**ACADIA**  
HEALTHCARE

[www.acadiahealthcare.com](http://www.acadiahealthcare.com)

Child - Adolescent - Geriatric - Dual Diagnosis

# Index to Advertisers May 2007

The publication of an advertisement in this journal does not imply endorsement of the product or service by the American Psychiatric Association.

|                                                                      |                                      |
|----------------------------------------------------------------------|--------------------------------------|
| American Journal of Psychotherapy.....                               | A35                                  |
| AstraZeneca MEASURE.....                                             | A38                                  |
| Bristol-Myers Squibb Company<br>Abilify .....                        | A39-A44                              |
| Eli Lilly and Company<br>Zyprexa.....                                | A7                                   |
| Employment Opportunities .....                                       | A58-A63                              |
| Forest Laboratories, Inc.<br>Lexapro .....                           | A9-A10                               |
| Janssen Pharmaceutica<br>Invega .....                                | A19-A26                              |
| Johns Hopkins University Press .....                                 | A38                                  |
| McNeil-PPC, Inc.<br>Concerta .....                                   | A17-A18                              |
| Montefiore Medical Center .....                                      | A27                                  |
| Osler Institute .....                                                | A35, A47                             |
| PBM Pharmaceuticals, Inc.<br>Animi-3.....                            | A37-A38                              |
| Sepracor<br>Lunesta.....                                             | A29-A30                              |
| Symposia.....                                                        | A2, A6, A8, A15, A35                 |
| U.S. Pharmaceuticals, Pfizer, Inc.<br>Corporate.....<br>Geodon ..... | A11-A12, A49-A50<br>A31-A34<br>C3-C4 |
| University of Pittsburgh School of Medicine<br>.....                 | A48                                  |
| Wyeth Pharmaceuticals, Inc.<br>Corporate.....<br>Effexor XR .....    | C2-A1<br>A51-A55                     |

## Subscription and Business Information

The American Journal of Psychiatry, ISSN 0002-953X, is published monthly by the American Psychiatric Association, 1000 Wilson Blvd., Suite 1825, Arlington, VA 22209-3901. Subscriptions (per year): individual \$205.00, international \$308.00. For additional subscription options, including single issues and student rates, please contact Customer Service at 1-800-368-5777 or email [appi@psych.org](mailto:appi@psych.org). Institutional subscriptions are tier priced. For institutional site license or pricing information, contact Customer Service or visit <http://highwire.stanford.edu/tfocis/>.

Business communications, address changes, and subscription questions from APA members should be directed to the Division of Member Services: (888) 35-PSYCH (toll-free). Nonmember subscribers should call the Circulation Department (800) 368-5777. Author inquiries should be directed to the Journal editorial office: (703) 907-7885 or (703) 907-7884; fax (703) 907-1096; e-mail [ajp@psych.org](mailto:ajp@psych.org).

Business Management: Nancy Frey, Director, Publishing Services; Laura G. Abedi, Associate Director, Production; Brian Skepton, Advertising Sales and Marketing Manager, Nonpharmaceutical and Online Sales; Alison Jones, Advertising Prepress Manager; Robert Pursell, Director, Sales and Marketing.

Director, Advertising Sales: Raymond J. Purkis, Director, 2444 Morris Avenue, Union, NJ 07083; (908) 964-3100.

Pages are produced using Adobe FrameMaker+ SGML 6.0 Printed by Cadmus Communications, Richmond, Va., on acid-free paper effective with Volume 140, Number 5, May 1983.

Periodicals postage paid at Arlington, VA, and additional mailing offices. POSTMASTER: Send address changes to The American Journal of Psychiatry, Circulation Department, American Psychiatric Association, 1000 Wilson Blvd., Suite 1825, Arlington, VA 22209-3901.

Indexed in Abstracts for Social Workers, Academic Abstracts, Biological Abstracts, Chemical Abstracts, Chicago Psychoanalytic Literature Index, Cumulative Index to Nursing Literature, Excerpta Medica, Hospital Literature Index, Index Medicus, International Nursing Index, Nutrition Abstracts, Psychological Abstracts, Science Citation Index, Social Science Source, and Social Sciences Index.

The American Psychiatric Association does not hold itself responsible for statements made in its publications by contributors or advertisers. Unless so stated, material in The American Journal of Psychiatry does not reflect the endorsement, official attitude, or position of the American Psychiatric Association or of the Journal's Editorial Board.

Authorization to photocopy items for internal or personal use, or the internal or personal use of specific clients, is granted by the American Psychiatric Association for libraries and other users registered with the Copyright Clearance Center (CCC) Transactional Reporting Service, provided that the base fee of \$15.00 per copy is paid directly to CCC, 222 Rosewood Drive, Danvers, MA 01923; (978) 750-8400 (tel), (978) 646-8600 (fax), [www.copyright.com](http://www.copyright.com) (web site). 0002-953X/05/\$15.00.

This consent does not extend to other kinds of copying, such as copying for general distribution, for advertising or promotional purposes, for creating new collective works, or for resale. Requests for commercial distribution should be directed to (703) 907-7894. APA does not require that permission be obtained for the photocopying of isolated articles for nonprofit classroom or library reserve use; all fees associated with such permission are waived.

Copyright © 2005 American Psychiatric Association.



*Control acute agitation with*

# **GEODON<sup>®</sup>**

*for Injection (ziprasidone mesylate)*

*In schizophrenia...*

## **Rapid improvement with low EPS<sup>1,2</sup>**

- Significant control achieved between 15 and 30 minutes\* after injection<sup>1,3</sup>
- Proven advantages over haloperidol IM
  - twice the improvement as measured on the BPRS<sup>4†</sup>
  - significantly lower incidence of movement disorders<sup>2‡</sup>
- Smooth transition, with continued improvement, from IM to oral therapy<sup>2,4</sup>
- May be used concomitantly with benzodiazepines

\* In 2 pivotal studies vs control, significance was achieved at 15 minutes (with 10 mg dose) and 30 minutes (with 20 mg dose), respectively.

† In a 7-day, open-label IM-to-oral transition study.

‡ In a 6-week, open-label IM-to-oral transition study.

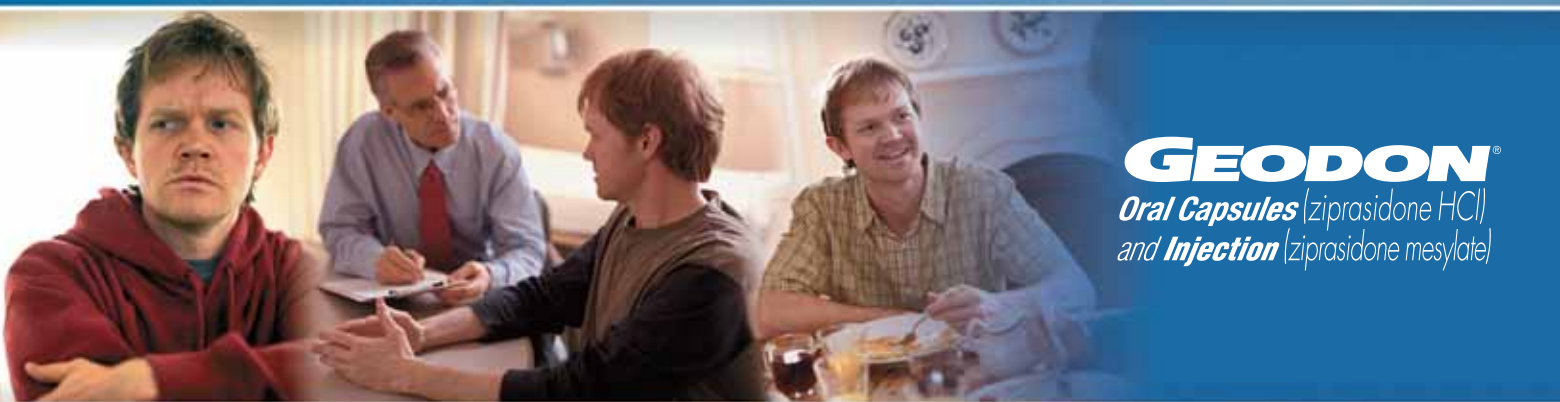

**GEODON<sup>®</sup>**  
*Oral Capsules (ziprasidone HCl)  
and Injection (ziprasidone mesylate)*

Elderly patients with dementia-related psychosis treated with atypical antipsychotic drugs are at an increased risk of death compared to placebo. GEODON is not approved for the treatment of patients with dementia-related psychosis.

GEODON is contraindicated in patients with a known history of QT prolongation, recent acute myocardial infarction, or uncompensated heart failure, and should not be used with other QT-prolonging drugs. GEODON has a greater capacity to prolong the QT<sub>c</sub> interval than several antipsychotics. In some drugs, QT prolongation has been associated with torsade de pointes, a potentially fatal arrhythmia. In many cases this would lead to the conclusion that other drugs should be tried first.

In fixed-dose, pivotal studies, the most commonly observed adverse events associated with the use of GEODON for Injection (incidence  $\geq 5\%$ ) and observed at a rate in the higher GEODON dose groups (10 mg, 20 mg) of at least twice that of the lowest GEODON dose group (2 mg control) were somnolence (20%), headache (13%), and nausea (12%).

Please see brief summary of prescribing information on adjacent page.
