# THE AMERICAN JOURNAL OF PSYCHIATRY

Official Journal of the American Psychiatric Association

## Instructions for Activating Your Online Subscription

All subscribers to the print edition of *The American Journal of Psychiatry* are automatically eligible to view the *Journal* online. The online version of the *Journal* allows you to conduct searches for topics of interest in issues going all the way back to 1844. Plus the only way readers can participate in the *Journal's* new CME Course program is to have an activated online subscription (note: there is an additional annual fee to be enrolled and eligible to receive up to 36 hours of category 1 CME credit).

To activate your online subscription:

Make sure you have your customer identification number available. This number is printed on your *Journal* mailing label, directly above your name and address. If you cannot locate this number, please contact American Psychiatric Publishing, Inc., through one of the following methods:

- e-mail: [accessnumber@psych.org](mailto:accessnumber@psych.org)
- phone: (800) 368-5777
- fax: (703) 907-1091
- mail:

American Psychiatric Publishing, Inc.  
1000 Wilson Blvd., Suite 1825  
Arlington, VA 22209-3901  
Attn: Circulation Department.

Internet: <http://www.psychiatryonline.org>. Click on the "Subscriptions" button located near the bottom of the page. Then click on the appropriate link:

- ACTIVATE Your Member or Individual (Nonmember) Subscription

For APA Members, you will find your member number on the mailing label above your name. It is

a 10-digit number beginning with zeros. Enter your number in the box and click the SUBMIT button.

For Individual Nonmembers and Institutions, your customer number is on the mailing label above your name. It is a 10-digit number beginning with 22 or 30. Enter this number in the box and click the SUBMIT button.

Fill out all the information on the next screen and press the "Send Form" button at the bottom on the right.

When finished, click the "Done" button. You will receive an e-mail confirmation that your subscription has been activated.

**Continuing Medical Education:** You now have an opportunity to earn CME credits by reading articles in *The American Journal of Psychiatry*. Three articles in each issue will each comprise a short course for up to 1 hour category 1 CME credit each. The course comprises reading the article and answering three multiple-choice questions with a single correct answer. CME Credit is issued only online. Readers who want credit must subscribe to the AJP Continuing Medical Education Course program (APA Members: \$97.00 per year; Nonmember subscribers: \$144.00 per year; nonmember nonsubscribers: \$180.00 per year). Go to [cme.psychiatryonline.org](http://cme.psychiatryonline.org), select *The American Journal of Psychiatry* at that site, take the course(s) of your choosing, complete the evaluation form, and submit your answers for CME credit. In the online course, correct answers will be highlighted for your reference; there is no minimum threshold score necessary for the credit. A link from the question to the correct answer in context will be highlighted in the associated article. A certificate for each course will be generated upon successful completion.

The American Journal of Psychiatry is online at [ajp.psychiatryonline.org](http://ajp.psychiatryonline.org)

# New Feature for Residents!

## The American Journal of Psychiatry Residents' Journal

A FREE electronic publication produced specifically for psychiatry residents

The Residents' Journal contains special links to full text of the articles from the current *American Journal of Psychiatry* and to AJP Audio, a downloadable MP3 file featuring highlights from the issue. In addition, this e-mail bulletin contains two exclusive features:

### Journal Club Kit

A featured article presented with an overview discussing the reasons for its selection, discussion questions, and an editorial by a senior member of the field placing the article into clinical context.

### Educational Article

Case presentation that illustrates a major point in clinical practice or highlights unique treatment approaches.

Plus lively contributions from your fellow residents:

- Instructive cases
- Unique clinical or educational programs
- Perspectives on training and career development
- Discussions arising from journal club discussions

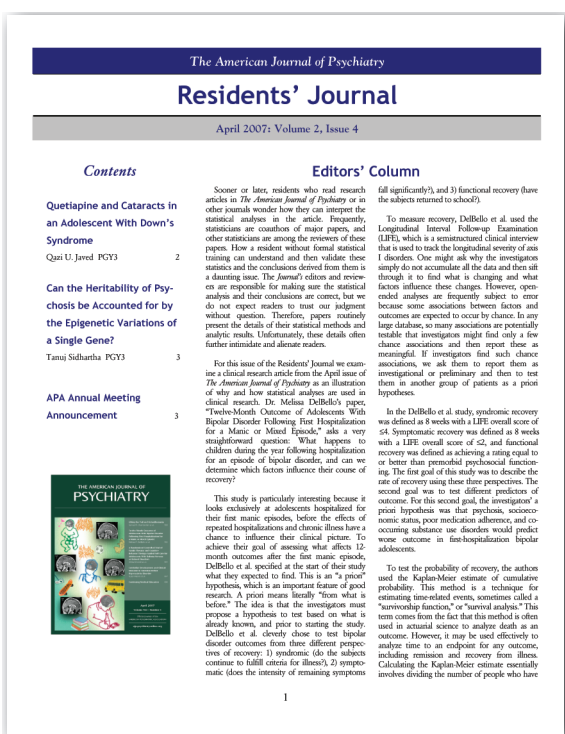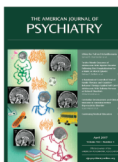

The Resident's Journal is sent free-of-charge to all psychiatry residents. Anyone interested in being included on the distribution list should contact Lisa Devine, the Residents' Journal staff editor at [ajp@psych.org](mailto:ajp@psych.org) with "Subscribe to Residents' Journal" in the subject line.

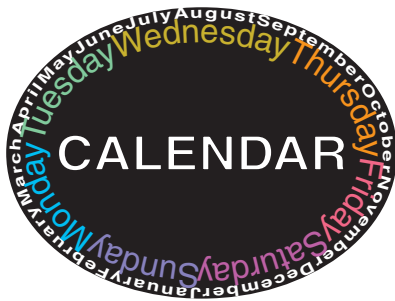

For free listing of your organization's official annual or regional meeting, please send us the following information: sponsor, location, inclusive dates, type and number of continuing education credits (if available), and the name, address, and telephone number of the person or group to contact for more information. In order for an event to appear in our listing, all notices and changes must be received at least 6 months in advance of the meeting and should be addressed to:

Calendar, American Journal of Psychiatry, 1000 Wilson Boulevard, Suite 1825, Arlington, VA 22209-3901, [jblair@psych.org](mailto:jblair@psych.org) (e-mail).

Because of space limitations, only listings of meetings of the greatest interest to Journal readers will be included.

## MAY

**May 17–20**, The 51st Annual Meeting of the American Academy of Psychoanalysis and Dynamic Psychiatry, San Diego. Contact: Executive Office, American Academy of Psychoanalysis and Dynamic Psychiatry, P. O. Box 30, Bloomfield, CT 06002; (888) 691-8281 (tel), (888) 286-0787 (fax), [aap@ssmgt.com](mailto:aap@ssmgt.com) (e-mail), [www.aapdp.org](http://www.aapdp.org) (web site).

**May 19–24**, 160th Annual Meeting of the American Psychiatric Association, San Diego. Contact: Cathy Nash, APA Annual Meetings Dept., 1000 Wilson Blvd., Ste. 1825, Arlington, VA 22209; (703) 907-7822.

## JUNE

**June 6–8**, WPA Thematic Conference, Dresden, Germany. Contact: Anett Reimann, Intercom Dresden GmbH, Zelle-scher Weg 3, 01069 Dresden, Germany; 49 (351) 4633 3014 (tel), 49 (351) 4633 7049 (fax), [areimann@intercom.de](mailto:areimann@intercom.de) (e-mail), [www.wpa2007dresden.org](http://www.wpa2007dresden.org) (web site).

## OCTOBER

**October 6–7**, 6th NYU Reproductive Psychiatry Conference, New York. Contact: Dr. Shari I. Lusskin, Director of Reproductive Psychiatry, New York University School of Medicine, 155 East 29th Street, Suite 26J, New York, NY 10016; (212) 263-5295 (tel), [www.med.nyu.edu/cme](http://www.med.nyu.edu/cme) (web site).

**October 7–11**, 15th World Congress on Psychiatric Genetics, New York. Contact: Lynn E DeLisi, International Society of Psychiatric Genetics, NYU School of Medicine, 650 First Avenue, 5th Floor Room 543, New York, NY 10016; (212) 263-3420 (tel), (212) 263-3407 (fax), [DeLisi76@AOL.com](mailto:DeLisi76@AOL.com) (e-mail), [www.WCPG2007.com](http://www.WCPG2007.com) (web site).

**October 11–14**, 59th Institute on Psychiatric Services, American Psychiatric Association, New Orleans, LA. Contact: Jill Gruber, APA Annual Meetings Dept., 1000 Wilson Blvd., Ste. 1825, Arlington, VA 22209; (703) 907-7815.

**October 12–15**, Annual Meeting of the Society for the Study of Psychiatry and Culture (SSPC), Hyatt Regency Capitol Hill, Washington, DC. Contact: Jim Boehlein or Shannon Squire, (503) 220-3481, [shannon.squire@med.va.gov](mailto:shannon.squire@med.va.gov) (e-mail).

**October 23–28**, 54th Annual Meeting of the American Academy of Child and Adolescent Psychiatry, Boston. Contact: AACAP, 3615 Wisconsin Avenue, N.W., Washington, DC 20016-3007; (202) 966-7300 (tel), (202) 966-2891 (fax), [meetings@aacap.org](mailto:meetings@aacap.org) (e-mail), [www.aacap.org](http://www.aacap.org) (web site).

## FEBRUARY 2008

**February 15–18**, 21st Annual Meeting of the American Association for Geriatric Psychiatry, Washington, DC. Contact: AAGP, 7910 Woodmont Ave., Ste. 1050, Bethesda, MD 20814-3004; (301) 654-7850 (tel), (301) 654-4137 (fax), [www.aagpmeeting.org](http://www.aagpmeeting.org) (web site).

**February 27–March 2**, Annual meeting of the American College of Psychiatrists, Kauai, Hawaii. Contact: American College of Psychiatrists, 122 S. Michigan Ave., Ste. 1360, Chicago, IL 60603; (312) 662-1020 (tel), (312) 662-1025 (fax), [maureen@acpsych.org](mailto:maureen@acpsych.org) (e-mail).

## MARCH

**March 14–17**, 21th Annual Meeting of the American Association for Geriatric Psychiatry, Orlando. Contact: AAGP, 7910 Woodmont Ave., Ste. 1050, Bethesda, MD 20814-3004; (301) 654-7850 (tel), (301)

654-4137 (fax), [www.aagpmeeting.org](http://www.aagpmeeting.org) (web site).

**March 26–29**, Annual Meeting and Scientific Sessions of the Society of Behavioral Medicine, San Diego. Contact: Society of Behavioral Medicine, 17000 Commerce Parkway, Ste. C, Mount Laurel, NJ 08054; (856) 439-1297 (tel), (856) 439-0525 (fax), [info@sbm.org](mailto:info@sbm.org) (e-mail).

## MAY

**May 1–4**, The 52nd Annual Meeting of the American Academy of Psychoanalysis and Dynamic Psychiatry, Washington, DC. Contact: Executive Office, American Academy of Psychoanalysis and Dynamic Psychiatry, P. O. Box 30, Bloomfield, CT 06002; (888) 691-8281 (tel), (888) 286-0787 (fax), [aap@ssmgt.com](mailto:aap@ssmgt.com) (e-mail).

**May 3–4**, American Academy of Psychiatry and the Law Semiannual Meeting, Washington, D.C. Contact: One Regency Drive, PO Box 30, Bloomfield, CT 06002-0030; (800) 331-1389, (tel) (860) 286-0787 (fax), [execoff@aapl.org](mailto:execoff@aapl.org) (e-mail).

**May 3–8**, 161st Annual Meeting of the American Psychiatric Association, Washington, DC. Contact: Cathy Nash, APA Annual Meetings Dept., 1000 Wilson Blvd., Ste. 1825, Arlington, VA 22209; (703) 907-7822.

## JUNE

**June 19–21**, Thematic Conference on Depression and Relevant Psychiatric Condition in Primary Care, Granada, Spain. Contact: Francisco Torres-González, Andalusian Research Group on Mental Health, University of Granada, Avenida deMadrid 11, Granada 18071, Spain; (34) 958-272651 (tel), (34) 958-275214 (fax), [ftorres@ugr.es](mailto:ftorres@ugr.es) (e-mail).

Continued on page A57

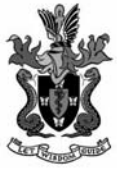

# THE BRITISH JOURNAL OF PSYCHIATRY

April 2007, VOL. 190

A12 Editorial Board

A13 Highlights of this issue

A14 Psychiatry in pictures

## EDITORIALS

283 **Can deficits in social problem-solving in people with personality disorder be reversed?**  
M.J. Crawford

285 **Management of insomnia in older adults**  
B. Sivertsen and I.H. Nordhus

## REVIEW ARTICLE

287 **Therapeutic effect of follow-up assessments on antidepressant and placebo response rates in antidepressant efficacy trials. Meta-analysis**  
M.A. Posternak and M. Zimmerman

## PAPERS

293 **Depression and socio-economic risk factors: 7-year longitudinal population study**  
V. Lorant, C. Croux, S. Weich, D. Deliège, J. Mackenbach, and M. Anseau

299 **Population level of unmet need for mental healthcare in Europe**  
J. Alonso, M. Codony, V. Kovess, M.C. Angermeyer, S.J. Katz, J.M. Haro, G. de Girolamo, R. de Graaf, K. Demyttenaere, G. Vilagut, J. Almansa, J.P. Lépine, and T.S. Brugha on behalf of the ESEMeD/MHEDEA 2000 investigators

307 **Social problem-solving plus psychoeducation for adults with personality disorder. Pragmatic randomised controlled trial**  
N. Huband, M. McMurrin, C. Evans, and C. Duggan

314 **Fair assessment of the merits of psychiatric research**  
G. Lewison, G. Thornicroft, G. Szukler, and M. Tansella

319 **Psychiatric disorder among British children looked after by local authorities: comparison with children living in private households**  
T. Ford, P. Vostanis, H. Meltzer, and R. Goodman

326 **Impact of psychiatric disorders on health-related quality of life: general population survey**  
S.I. Saarni, J. Suvisaari, H. Sintonen, S. Pirkola, S. Koskinen, A. Aromaa, and J. Lönnqvist

333 **Burden on caregivers of people with schizophrenia: comparison between Germany and Britain**

C. Roick, D. Heider, P.E. Bebbington, M.C. Angermeyer, J.-M. Azorin, T.S. Brugha, R. Kilian, S. Johnson, M. Toumi, and Å. Kornfeld on behalf of the EuroSC Research Group

339 **Association between trauma exposure and delusional experiences in a large community-based sample**  
J. Scott, D. Chant, G. Andrews, G. Martin, and J. McGrath

344 **Effect of comorbid anxiety on treatment response and relapse risk in late-life depression: controlled study**  
C. Andreescu, E.J. Lenze, M.A. Dew, A.E. Begley, B.H. Mulsant, A.Y. Dombrovski, B.G. Pollock, J. Stack, M.D. Miller, and C.F. Reynolds

350 **Enduring consequences of terrorism: 7-month follow-up survey of reactions to the bombings in London on 7 July 2005**  
G.J. Rubin, C.R. Brewin, N. Greenberg, J. Hacker Hughes, J. Simpson, and S. Wessely

## SHORT REPORTS

357 **Hypothalamic—pituitary—adrenal axis response in borderline personality disorder without post-traumatic features**  
J.L. Carrasco, M. Díaz-Marsá, J.I. Pastrana, R. Molina, L. Brotons, M.I. López-Ibor, and J.L. López-Ibor

359 **Lithium and risk for Alzheimer's disease in elderly patients with bipolar disorder**  
P.V. Nunes, O.V. Forlenza, and W.F. Gattaz

## COLUMNS

361 Correspondence

365 One hundred years ago

365 Corrigendum

366 Book reviews

368 Contents of the *American Journal of Psychiatry*

369 Contents of *Advances in Psychiatric Treatment*

370 From the Editor's desk

# Psychological Medicine

Volume 37 Number 4 April 2007

## CONTENTS

|                                                                                                                                                                                                                                                                                                                                     |     |                                                                                                                                                                                                                                              |     |
|-------------------------------------------------------------------------------------------------------------------------------------------------------------------------------------------------------------------------------------------------------------------------------------------------------------------------------------|-----|----------------------------------------------------------------------------------------------------------------------------------------------------------------------------------------------------------------------------------------------|-----|
| <b>In this Issue</b>                                                                                                                                                                                                                                                                                                                | 465 | <b>What predicts poor mother–infant interaction in schizophrenia?</b>                                                                                                                                                                        |     |
| <b>REVIEW ARTICLE</b>                                                                                                                                                                                                                                                                                                               |     | WAN, M.W., SALMON, M.P., RIORDAN, D.M., APPLEBY, L.,<br>WEBB, R., AND ABEL, K.M.                                                                                                                                                             | 537 |
| <b>Predicting costs of mental health care: a critical literature review</b> JONES, J., AMADDEO, F., BARBUI, C., AND TANSELLA, M.                                                                                                                                                                                                    | 467 | <b>Aggressive behaviour at first contact with services: findings from the AESOP First Episode Psychosis Study</b> DEAN, K., WALSH, E., MORGAN, C., DEMJAHA, A., DAZZAN, P., MORGAN, K., LLOYD, T., FEARON, P., JONES, P.B., AND MURRAY, R.M. | 547 |
| <b>ORIGINAL ARTICLES</b>                                                                                                                                                                                                                                                                                                            |     | <b>False memory and schizophrenia: evidence for gist memory impairment</b> LEE, Y.-S., IAO, L.-S., AND LIN, C.-W.                                                                                                                            | 559 |
| <b>Young males have a higher risk of developing schizophrenia: a Danish register study</b> THORUP, A., WALTOFT, B.L., PEDERSEN, C.B., MORTENSEN, P.B., AND NORDENTOFT, M.                                                                                                                                                           | 479 | <b>Verbal self-monitoring in psychosis: a non-replication</b> VERSMISSEN, D., JANSSEN, I., JOHNS, L., MCGUIRE, P.M., DRUKKER, M., À CAMPO, J., MYIN-GERMEYS, I., VAN OS, J., AND KRABBENDAM, L.                                              | 569 |
| <b>Risk of schizophrenia in second-generation immigrants: a Danish population-based cohort study</b> CANTOR-GRAAE, E., AND PEDERSEN, C.B.                                                                                                                                                                                           | 485 | <b>Slow habituation of arousal associated with psychosis proneness</b> ALLEN, P., FREEMAN, D., AND MCGUIRE, P.                                                                                                                               | 577 |
| <b>Parental separation, loss and psychosis in different ethnic groups: a case-control study</b> MORGAN, C., KIRKBRIDE, J., LEFF, J., CRAIG, T., HUTCHINSON, G., MCKENZIE, K., MORGAN, K., DAZZAN, P., DOODY, G.A., JONES, P., MURRAY, R., AND FEARON, P.                                                                            | 495 | <b>Using transcranial magnetic stimulation to investigate the cortical origins of motor overflow: a study in schizophrenia and healthy controls</b> HOY, K.E., GEORGIU-KARISTIANIS, N., LAYCOCK, R., AND FITZGERALD, P.B.                    | 583 |
| <b>Delusional ideation and manic symptoms in potential future emigrants in Uganda</b> LUNDBERG, P., CANTOR-GRAAE, E., KAHIMA, M., AND ÖSTERGREN, P.-O.                                                                                                                                                                              | 505 | <b>The effect of antipsychotic treatment on Theory of Mind</b> MIZRAHI, R., KOROSTIL, M., STARKSTEIN, S.E., ZIPURSKY, R.B., AND KAPUR, S.                                                                                                    | 595 |
| <b>Does normal developmental expression of psychosis combine with environmental risk to cause persistence of psychosis? A psychosis proneness–persistence model</b> COUGNARD, A., MARCELIS, M., MYIN-GERMEYS, I., DE GRAAF, R., VOLLEBERGH, W., KRABBENDAM, L., LIEB, R., WITTCHEN, H.-U., HENQUET, C., SPAUWEN, J., AND VAN OS, J. | 513 | <b>BOOK REVIEWS</b>                                                                                                                                                                                                                          |     |
| <b>Postpartum psychosis: two cohorts compared, 1875-1924 and 1994-2005</b> TSCHINKEL, S., HARRIS, M., LE NOURY, J., AND HEALY, D.                                                                                                                                                                                                   | 529 | <i>Seminars in Child and Adolescent Psychiatry (2nd edn)</i> PEIRIS, T. AND IQBAL, Z.                                                                                                                                                        | 603 |
|                                                                                                                                                                                                                                                                                                                                     |     | <i>Neuroethics. Defining the Issues in Theory, Practice and Policy</i> SAHAKIAN, B.                                                                                                                                                          | 603 |
|                                                                                                                                                                                                                                                                                                                                     |     | <i>American Journal of Psychiatry Contents December 2006</i>                                                                                                                                                                                 | 605 |
